# Supplementary material for: Gene Expression Signature-Based Screening Identifies New Broadly Effective Influenza A Antivirals
Source: PLoS One. 2010 Oct 4;5(10):e13169. doi: 10.1371/journal.pone.0013169 (PMC2949399; doi:10.1371/journal.pone.0013169)
Supplement: Table S2 — Gene expression data for 300 influenza virus regulated genes identified in our experiments. Values are log2 normalized gene expression intensities (see Experimental Procedures). (0.28 MB XLS) [file pone.0013169.s011.xls]

## Sheet: Gene Expression
CloneID	Name	Symbol	Alias	Entrez GeneID	H1N1	H1N1	H1N1	H1N1	H1N1	H3N2	H3N2	H3N2	H3N2	H3N2	H5N1	H5N1	H5N1	H5N1	H5N1	H5N2	H5N2	H5N2	H5N2	H5N2	H7N1	H7N1	H7N1	H7N1	H7N1	Mock	Mock	Mock	Mock	Mock
51372	Cytoplasmic linker associated protein 2	CLASP2		23122	5.57760809009069	8.32960852718205	-1.36340841655092	8.67487771122003	-0.987680271875256	3.22807340995537	3.44289101799044	8.3815176936015	8.01897632353744	3.86884208615353	7.8956824535922	8.14354233133407	8.4490972908561	8.5541126749968	8.12111100415284	-0.588153309828079	5.44840386671017	8.4367043611889	7.25012935740371	8.66770760012282	8.47409341106787	6.29683636302127	-1.83976602367221	8.14593988255354	8.33306513481066	8.74774756591113	8.28600647107575	8.53080473612935	8.03687566851654	9.55065194941662
183462	Mannosidase, alpha, class 2C, member 1	MAN2C1		4123	8.62226649162554	8.11084255742723	6.76624708913865	0.9193581873805	7.7542693904528	8.05916342369757	7.14886976415936	8.51234498274034	7.6429981931391	7.94813219133262	-1.83976602367221	2.41782634984849	7.8498206368456	8.23343522521436	2.31426973828464	6.91981111408204	-1.83976602367221	7.76200886606998	5.77287829794949	-1.83976602367221	8.07427907735613	7.90467158333065	6.5771704124653	8.21579630737934	8.37777969702362	7.30688446919856	7.11317524159458	7.88191441815041	7.49959236657235	8.05529580151383
320252	BTB (POZ) domain containing 11	BTBD11		121551	7.63702977961855	7.04861982323098	7.10290276165927	7.77336430697897	7.30073628566624	5.58189560877353	4.16450345269203	5.31851420806832	5.56469218071249	4.1490878663803	5.66333200745837	6.74478701119464	7.39505398423128	6.65356602687398	6.18013608724194	6.9489397450977	6.43886043198554	7.34975334473488	6.97999528283815	7.10290276165927	6.27778705271736	5.2682976971827	4.04967625649748	5.3873591594719	7.90467158333065	6.87937628524583	7.64462445712274	8.34606344310853	7.23991222629317	8.27721249617999
714266	actin, beta	ACTB		60	12.0155190376133	12.4750028276158	12.1589709241301	12.7840928513721	12.3543599345616	9.84420421184156	8.60461415964554	9.99053910126711	9.90029964562154	9.96737790747934	11.5023019812666	11.1518532275553	11.3133779586912	11.3424618473792	10.7761257108296	11.7158635570770	11.2156117057549	11.4298224135811	12.1063149591587	11.5320882539653	10.6379573997221	11.0271994024414	10.6948007710170	11.041645052259	11.5763735240006	12.4285443491322	12.4645485340931	12.0249930973987	12.3102043090220	12.4183960204264
730942	2,4-dienoyl CoA reductase 2, peroxisomal	DECR2		26063	0.817937303180472	7.24297794034128	7.90015224638042	-0.987680271875256	7.70572314755385	5.40233749506527	5.22483574210902	6.2537194511332	5.89162606503492	6.22109745239458	5.35639624996178	7.22699385164507	7.99365876675777	7.0859894666497	7.33340589966717	7.8498206368456	7.30464099994849	7.42363122309242	5.6780206316016	7.32358954710786	6.50402959853174	7.21163728621096	6.89007346634371	6.40319382250038	3.62182005004677	7.8700808117837	7.89634385352098	6.79623022729639	7.77864193343049	7.93875935495498
125376	Gem (nuclear organelle) associated protein 4	GEMIN4		50628	3.84969211679349	5.91116440649805	8.22722499649146	8.45080028963034	9.36511565941048	8.11084255742723	7.5270644444811	7.19896125750861	-0.987680271875256	6.5774565553564	6.17884478077995	5.96422204132092	8.14235468361492	7.63524617056148	5.2643689566119	5.96624988956588	7.01178739253686	6.93454430781356	8.7175706456631	8.22604286668601	7.561666248134	8.00452299281748	7.84687084787275	8.22604286668601	6.4647424439808	9.12137323471585	8.43626401512213	7.36885812028425	8.10005173135904	8.47630103997689
2349125	Pre-B lymphocyte 3	VPREB3		29802	9.9662243764828	11.0521029874035	10.5935809955532	11.1866862501962	10.8098369782272	7.29171277225665	5.11373095830301	8.57855320207546	8.64460141348542	8.16932494266482	8.8851923620424	8.24568665619558	9.30645299374792	9.50478933363374	9.16613598348287	9.54450916412772	9.81234141134942	10.2833369282526	11.0122325489633	9.55696292548669	8.3672049515253	7.28731319087415	8.28958039110819	8.87946294004095	10.5449747272616	11.6470782419880	10.6518796904566	11.041645052259	9.9345286727084	10.9329498971830
1473929	Ets variant 3	ETV3		2117	7.4633302298563	7.8001107550654	7.39842711652305	6.41963982479405	6.4760070779623	8.98606704225313	8.08971311434822	7.90738491550293	8.63693837787129	8.82916537418518	8.34424842603185	8.2622396846101	7.78929647790155	8.64283264325353	8.81688041518014	7.87975461496447	8.79617805621078	8.61247408673903	8.6106596286099	9.05356973574817	8.80585327399274	-0.588153309828079	9.0144396486154	8.81589929145271	8.8689599157921	0.0626179705954004	1.36707020737796	0.252955199737426	7.412580766426	6.72688164689168
682091	Helicase (DNA) B	HELB		92797	5.77587882016604	7.49376480145764	7.13823145152749	3.17700945291871	6.51717525888809	5.68371244231743	4.45996329655326	2.64815594675075	6.38138359512453	5.45556132903382	7.21395279743465	7.06430733624737	7.55008488091715	4.6300712420995	5.45480007648725	6.81661752771547	6.59719051370775	5.63323437682483	7.36325052178964	7.12804197428287	5.66511099863696	6.08475793951199	6.13122611767115	6.18909107961259	6.3844821298354	7.24516635535358	7.19236273892337	7.34778295616333	6.95830556127112	7.1475086148578
50160	Sushi domain containing 1	SUSD1		64420	4.36868989830415	7.34495220592965	6.51532831419062	7.14861446547365	6.78876943224597	5.58189560877353	6.29083544477816	6.2537194511332	5.80453460721062	5.73048110076928	6.68963158020194	5.7119126234158	5.17025786339887	6.26422492496779	6.27623618182767	3.49448447595954	5.37303637634627	4.92839618640404	6.81612934018206	6.06911967167473	5.99275803506341	5.89228034310688	6.445933939365	5.9598488241576	6.50402959853174	7.81217377601514	6.50303291076704	6.95999725655805	7.223715195575	7.16705937276092
591684	Ribosomal RNA processing 7 homolog A (S. cerevisiae)	RRP7A	CGI-96	27341	7.17715268048966	8.02946625299516	7.43653036049747	7.89206721635638	7.74552191577984	8.28091650798382	6.16959586811796	7.99248209579964	7.90467158333065	7.78765049285107	7.72820856855037	4.82932633584167	7.14943843359503	7.8323912782734	0.443189066857439	7.30750724461212	6.76624708913865	7.1211052648604	7.89701366526689	6.88684645705625	6.82622826404157	7.96660739039401	0.443189066857439	7.36444880138007	8.03837137368329	8.53417998147737	9.4378365413024	8.73741855214007	8.37266224993157	8.3265574414123
142606	TGFB-induced factor homeobox 1	TGIF1		7050	8.13098496104905	8.95464565588691	8.63053955971815	9.48430593426943	8.74006826040246	7.74218763122124	6.45834405135451	7.72376461593066	-0.281808343259185	7.33669820588322	8.23488343031046	8.4017655007808	7.61264177925305	8.00760065664579	8.38978585659296	8.37777969702362	7.79515474161382	5.57593895611008	8.57135978384342	7.96517621580223	7.00577891491813	6.25129783164456	6.9571049811106	7.03989425111461	8.1150433208206	8.89892992660785	8.84787145661666	8.63693837787129	9.09978143562706	8.52289139888609
397872	Mitochondrial ribosomal protein L48	MRPL48		51642	6.33422504802342	8.00083367447933	7.42686637152805	7.78637148154505	6.5807618466683	7.62730426415563	7.01954516069897	7.82143796308957	6.76544410509861	6.31689070812517	7.72820856855037	7.26737645044568	5.79142051175007	1.92812740947199	5.4495201070024	7.6878304165838	6.73393435026068	7.70543630398379	6.53164944226534	7.7762898657148	6.03324002179794	7.83412577156869	6.59675991689408	7.9874621812374	7.38347449603723	8.96400959176175	7.67188644630151	7.80283108379359	8.08595342581809	8.36025589694376
1326169	NCK adaptor protein 1	NCK1		4690	10.9537092866292	10.7424208405482	9.85056562965579	10.1898085033516	10.3653178588624	9.30506371611537	8.06391421643178	7.25803641431389	8.97239972723381	9.42592533889976	9.55310576224624	9.13668204675491	9.5245105729705	10.0343964447214	9.21109657486473	11.3201090808216	8.35159805579854	9.7074963018969	10.5935809955532	8.04189399106385	9.71445846985787	9.01769618081359	0.870280431140233	8.44531024609936	10.4644769189933	10.8473859830874	11.0709568692103	11.1260642560686	10.0746155891767	10.5652689878641
531319	Aurora kinase B	AURKB		9212	8.90468349088106	9.41240528045616	9.31541056716774	7.4534359200518	8.95732444281347	7.5888302505176	6.80983669846111	5.35035177068534	8.73085263105871	8.1330013481447	8.18672236011375	5.69830904655556	8.19953587835181	8.05103754195702	0.817937303180472	9.20673412557313	8.74316631045754	9.04210716288263	0.60364324541809	8.77371190557774	5.85004833290668	8.66906579777302	7.31625102320386	1.09172125563471	8.9141464295049	9.07239125324003	8.82053874033197	9.48430593426943	8.79726699300237	9.45933700644196
511672	2'-5'-oligoadenylate synthetase-like	OASL		8638	7.45643324484273	7.8596961667131	7.74894383656535	6.3689059039033	7.89258169844622	8.84919389752238	9.79230796121434	8.60103354067607	8.92234445340853	9.13052680612936	9.01152813942621	10.2257628790835	10.0461727586204	9.7074963018969	9.79619653903496	7.958739085533	7.13658234950989	8.09575978553738	8.57855320207546	8.28646069140578	7.58760635219044	8.83886482539462	8.790956086895	8.44418771133306	8.8872891926181	7.43712283882142	6.28186196470243	7.01077857754298	6.15124138282649	6.60315821823159
587803	Ribophorin II	RPN2		6185	10.3213307078521	10.645738849917	10.8344627646950	10.9643253409276	10.4644769189933	8.87573593916595	8.16809320408732	9.38388632821961	8.9868169182966	9.32969346911843	9.84420421184156	9.80589309731486	9.94252798948066	9.86395752747757	10.4502087648824	10.9151383715455	9.69026128527536	9.94252798948066	10.6046781808826	10.5420011874375	10.2474979517184	9.37664910610447	9.9345286727084	8.97239972723381	10.1646730406592	11.0376040947677	10.9125743410067	10.9286600999593	11.2209483130282	11.3359660764460
1579639	Interferon, gamma	IFNG		3458	7.40768065008695	8.56167196481737	7.04303749640949	8.35307010366898	8.25695661167335	4.99875108322716	6.77167594259276	0.0626179705954004	6.20310325023664	5.2513026262024	6.99483192834257	5.7197202277466	7.34745527746053	7.27531431875207	7.40890489808035	7.66798214807773	7.55243633598366	6.37279041275385	9.14860502362336	7.20872146759152	6.48634676551358	5.64861811857169	6.9338915598964	6.64655643167957	7.27814711901467	8.4587283438596	7.80805363976788	8.20985321480325	7.4738280848127	8.79780286959761
346321	Signal peptide, CUB domain, EGF-like 2	SCUBE2		57758	3.61060438397834	3.83846514588347	2.59680307669622	5.45683525497918	2.97657681157172	3.71939661962387	4.10643870405808	4.27057625238879	3.607938917446	3.09480263540592	5.53040263284228	4.53694997633484	5.50093640007618	4.80712051398723	4.54520888279506	5.37910057203874	4.60059515106562	4.71348440182632	4.5870653732425	4.52229298573976	5.05169664736614	4.70997067419172	3.04096593150957	4.78827436139415	5.95502283239212	5.16473193210131	4.87365825609705	7.56837590111498	5.90655765683555	5.62808256248808
341675	Microtubule-associated protein 4	MAP4		4134	6.99050218846822	5.72490235320063	3.7491099031589	7.29644295862465	7.23123622168346	5.71851791960694	4.99739389117891	5.31851420806832	5.13144543809559	5.11560342137645	7.26368350837353	6.10026211699536	7.0085720511319	6.73249923774529	6.38631055438348	7.10432255848477	5.9237257706702	6.08475793951199	5.37631088261369	5.11289078876277	6.04429312163651	6.49007262985164	5.43561066109849	5.56166256286243	6.98044529750845	7.54399337396054	7.94360592438004	7.2205156303014	7.78420411366675	7.58610997090567
27908	Phospholipase C, epsilon 1	PLCE1		51196	5.66300676232875	5.13270307790867	5.43501083362784	5.48541383380691	4.85437526544924	3.71939661962387	5.27924323818047	4.39298646528239	4.6884439836142	4.96441398691061	4.52188465234105	4.46455867452413	5.71493648049572	5.4103652050676	5.3163752018308	5.99208842969385	5.63910666175997	5.42262369755743	5.52107031061332	5.53683738061989	5.14810099654811	5.1808244166048	5.25865965136243	4.78827436139415	5.05792114008919	6.35256673800124	6.28186196470243	6.47069683888132	6.41675608023762	7.23295631471202
448049	Mannosyl (alpha-1,3-)-glycoprotein beta-1,2-N-acetylglucosaminyltransferase	MGAT1		4245	8.22567161582944	7.89056374501008	6.40298262070644	8.35096553075885	7.7827877975276	6.43616581998319	4.74676941331192	7.03299618701246	5.84602312235453	6.1853028040418	7.53048930995867	7.36354088049321	7.97022757879218	8.73208016605772	6.88211927704308	8.08528638190304	7.02578524628949	7.85301733440999	8.159481201968	7.3943968225061	6.98907054494675	5.12325540881788	6.80831226187237	7.22699385164507	8.99338355960928	9.14860502362336	8.6209972577028	8.41565924619077	7.81076278293274	8.61180836596025
204456	Ankyrin repeat and BTB (POZ) domain containing 2	ABTB2		25841	5.49398208697349	7.93276091863997	7.18619285005412	7.85774463291081	8.24404146718764	8.29427027038538	7.68004950424241	6.9967481965075	7.47085190514781	7.8885796187918	7.77774097042616	7.61909724696735	7.44879851662903	7.4174797518248	8.49588515754605	5.91958938255588	7.19113497859725	8.196119410973	6.73638608849709	6.74855008154373	7.47356913159928	7.87891630120433	8.22851549103654	7.72254184377802	6.93513632263504	5.34151178586294	5.095301536611	4.63915750491972	5.93396474507988	6.90699826107848
510661	Nucleobindin 1	NUCB1		4924	9.37481825625194	9.75068836510336	9.63279105811965	9.8044531804135	9.1567834149923	7.98277386628536	7.12272922942335	7.97300238620361	7.51085954252715	8.05410900492333	8.66967377399207	8.71228482953952	9.06037698537147	9.27690363266449	7.64837317001809	9.48430593426943	8.8443484065875	8.73321496090879	9.40653286257493	8.83106093811217	8.53616872400687	8.06645178623835	8.49970418596072	6.31951692878705	9.46141946326327	9.7085777357077	9.6221412652477	10.6249594854232	9.37055222884837	10.2806613309124
563625	Cell division cycle 20 homolog (S. cerevisiae)	CDC20		991	9.09184969427342	9.80980993604466	8.70377218643661	9.9541825609229	8.86481640716828	7.48712783545946	6.63242595102097	7.88291289104996	5.78405291284772	7.64809972964024	7.13505690248564	7.08240315338746	7.18645639522438	8.05618212296389	7.62871119666061	8.8695624810782	8.02130717584334	8.0840004039618	8.92724908384058	8.17502949825934	1.55675146681346	8.04283997813307	7.35293298552526	7.67009214670529	8.63960851637014	9.08542051082036	9.09431148104107	9.3453766901861	9.07928502978327	9.38184705986442
565275	Cleavage and polyadenylation specific factor 1, 160kDa	CPSF1		29894	9.18710604040755	9.26894052350316	9.12283160829685	8.8135994225118	8.68751399816061	7.58230136297782	6.58181244247003	7.74858816160525	8.02761638245471	7.12743329711495	7.0877402688397	2.73766451559432	7.6074143631545	7.72510692119199	7.57792538907126	8.9381028107235	9.57141376150987	6.55452170340432	8.34424842603185	7.6683104537604	5.66926946624517	7.50521136851011	4.04635180103542	6.79084172258775	9.08542051082036	9.132645411248	9.25127069339767	9.05474218833133	9.98777522832616	9.5090076146604
207963	Solute carrier family 2 (facilitated glucose transporter), member 2	SLC2A2		6514	5.99803795762582	3.20056901422016	6.05511216354712	6.28538480550762	5.11604779090607	7.15592509606147	6.45834405135451	7.92414894578548	6.54844156331929	7.11935125166019	6.74588851656097	6.61280738955774	5.2972770460018	6.44913215334433	8.38192367792095	6.16559842480573	6.0822929060995	7.54792096379007	7.27814711901467	6.93298694031134	6.2086202315523	7.44830561215305	6.9338915598964	7.38104285088684	3.63310375283605	3.04096593150957	4.32115746255812	1.69242790438450	4.42344360399659	6.2539746101657
128065	BH3 interacting domain death agonist	BID		637	6.5037032317511	7.67625186206869	7.3730396640694	7.28617097725102	7.1653441612409	6.47236540289813	5.57019797950074	6.2537194511332	6.52640464526002	6.22109745239458	7.30834417890909	7.09112874191434	7.09371499059071	5.96679746772829	7.24977640318426	7.51835224383416	7.1673530364961	7.03404426239444	4.98298635650924	7.12804197428287	6.47871510130452	4.76626680151651	5.51695916432348	7.31139801206113	6.87876343361078	8.46032064257506	8.19378068957882	7.6046048355004	7.85380570189549	7.17318911943141
753240	Melanophilin	MLPH		79083	10.2833369282526	9.39647618474916	8.92797631760772	9.37664910610447	9.06200713406582	6.37573921182588	4.98245211057142	7.68208897715577	7.56622029556847	7.71004600831362	8.53616872400687	9.36511565941048	8.92797631760772	9.01996239630508	8.10005173135904	9.63973739381577	8.330666516504	8.29257551581819	9.13830718532896	8.45502470857718	8.10412935638415	7.40349566870672	6.01909802867576	6.96539449890277	8.81230161963639	9.75835325417797	9.43118468875586	9.38732072657606	9.8044531804135	9.04128649515178
263094	PTPRF interacting protein, binding protein 1 (liprin beta 1)	PPFIBP1		8496	5.25153783963038	5.66759283184402	4.35713436881164	5.69830904655556	2.67324868568925	5.44363890957937	9.64872496477717	5.58889629509684	5.56469218071249	5.37164570357015	5.71899384923274	5.68407301372521	4.88684452815324	6.01909802867576	6.63000210059827	5.10343721673241	5.16197981817735	5.84149607523613	5.88512755358975	5.49142184665492	5.92709569585683	5.64861811857169	5.43561066109849	5.82178730002543	5.77263300067486	3.58441263478301	4.45574546787406	2.46922139600312	4.51047625355774	3.6122218369306
79022	FBJ murine osteosarcoma viral oncogene homolog B	FOSB		2354	4.70099230006306	7.66459383413593	5.7292038201424	6.34643195877314	5.15926460556374	4.77009930279021	2.80543777326984	5.76362209949991	5.27716142976437	4.06281467789434	5.86905066478583	3.01248381058644	5.81069364714865	5.26853459778314	3.19675991618987	5.10343721673241	4.34270877305621	4.71348440182632	4.5870653732425	5.13474310774212	5.68140611847027	4.99682205970874	5.19470200516447	4.68817283206023	3.29619019106192	7.79515474161382	7.51564395360045	7.96793927518974	8.00682049613589	7.7849088524992
1851036	Cathepsin D	CTSD		1509	9.5179630709518	10.2257628790835	9.60934090332205	10.0654312392772	10.2159619442606	7.86439730763476	8.48696910076994	6.97655796055625	1.82723053504043	5.74763214086243	9.54042221291329	9.4419063352987	9.9059268482517	9.31704833930572	9.23768046620277	10.0169593739384	9.95127086278684	8.70446451609977	7.70385102007729	8.40786623038366	8.8851923620424	7.34614858797052	8.4181793626498	7.94990435432444	9.31704833930572	9.49511191575732	10.0829735737869	10.3783296626417	9.6221412652477	10.6908105525609
567177	tubulin, alpha 1a	TUBA1A	TUBA3	7846	10.6948007710170	11.1143002490698	10.8897601628793	10.4211634907906	11.2043804522864	9.35291443098722	8.41768784078922	9.37481825625194	10.3035527897409	9.2729268803527	8.6037746424567	9.05886686654674	9.39779927324239	7.82694162905837	8.85023124291274	11.3896498486924	10.5780417075792	9.75835325417797	11.3424618473792	10.4300247815941	10.3906368218553	10.1671355688768	9.9662243764828	9.56682540285082	10.756491665283	11.4824793060633	11.8363722168367	10.7903621854251	10.5294933398598	11.3896498486924
384966	Proteasome (prosome, macropain) 26S subunit, ATPase, 4	PSMC4		5704	5.76134713847353	4.2083424132431	6.01344494476139	6.18127808746786	5.30504408450052	6.05640654987583	8.74649167952877	6.78281290857858	6.08367287432012	5.73048110076928	7.72820856855037	6.80707994733358	6.22634359447058	6.15575621255445	6.13642335500543	6.97939100462499	6.0822929060995	7.1401739946535	5.14720492494223	7.11659697417071	6.32136457476677	2.54488131035099	6.34967609234058	5.58910591028725	5.89598666909264	7.18619285005412	8.81230161963639	9.0271608836047	6.68343440332221	6.3934531849033
416653	Phosphogluconate dehydrogenase	PGD		5226	12.5290498275591	13.2255396738875	12.3225761787494	12.6355678849822	12.8240968017947	10.6563862371259	9.23463643879044	10.2232762478173	10.6413880406685	10.645738849917	11.4636271355883	11.9000372730583	12.0347245701458	11.8660739664477	11.8808384390219	12.3774485223566	11.5243885882419	11.3965086524715	11.8363722168367	11.4031834700679	11.1441394375298	11.2814599798844	11.2156117057549	11.0757430743842	11.8363722168367	12.8686342571980	12.7972033498849	12.9246436700915	12.8414973441786	12.9407804642671
1157556	Phosphatidylinositol-3,4,5-trisphosphate-dependent Rac exchange factor 2	PREX2	DEPDC2	80243	7.39033748168178	8.62226649162554	6.66147121907391	7.84658386519428	7.98361148662047	5.84338123877376	5.59311923624277	6.53848806809087	6.20310325023664	6.29700330423048	7.13505690248564	7.6303079114202	7.61090907908042	7.12657795665206	7.13374686073091	8.41470229358347	7.30464099994849	7.223715195575	7.38824622312768	7.05727485687797	6.17952679760084	6.73609778299079	6.28660644960566	6.4976376281829	6.46208080104533	8.60202125169202	7.96140218412208	8.1407450094844	8.02039203967971	8.2988310262856
745138	Tubulin, alpha 3d	TUBA3D	Tuba2	113457	9.8023847178193	9.84758256693146	10.2770519141696	9.24433921965185	9.51576839697717	6.74478701119464	7.29611219523187	9.1945195180102	9.64184288804628	8.40384700705173	8.93171867776874	8.8032409100554	7.677222870878	5.68248018002323	6.86481616234548	9.59866588332576	9.95927784394742	9.45403541960048	8.82916537418518	9.38018097776041	9.00885354904158	8.38304481110561	10.0544513004433	9.29844707475004	9.4378365413024	10.3181763217558	10.7524513371427	10.6160926587928	9.91910727936687	9.91321574490673
239920	Proliferating cell nuclear antigen	PCNA		5111	9.7698346077755	10.6121884222069	10.6080378242093	9.82964348903646	10.5331057455649	8.75910044739703	8.54578873586609	5.28666887895825	9.23463643879044	9.09184969427342	9.42411742660798	9.2943235888167	9.13749484487367	9.34196852874826	9.14510076942756	10.7761257108296	9.44270071234454	10.8344627646950	9.05886686654674	9.93129943594242	9.36013062769877	9.75586418780424	8.0269457651861	8.72721926871988	9.91321574490673	10.7903621854251	10.6688578273338	10.8010639341241	10.5173905229091	10.5971861112639
395715	Sorting nexin 17	SNX17		9784	6.71389828118937	2.11816571635820	6.19173860575297	8.56352580687661	8.61884999228748	4.29459166904036	7.04155111786137	7.3444717739432	7.02915798939704	6.93786711615069	8.65672429755462	7.29579079921395	7.65298981371964	7.51239933876566	7.98061577915838	9.01574572583718	8.09932772959588	8.02039203967971	7.579459400244	8.05795146364964	6.60109820598002	7.47050816317165	7.11066443134489	8.37683757084998	8.40122571521404	8.90941073166956	9.3273513842824	9.2651100931168	8.50548885633454	8.94898168599366
116831	Tumor protein D52-like 1	TPD52L1		7164	6.69540120803981	7.56064337509138	6.80428094941616	7.8331877415372	6.46709809813176	5.40609572557208	3.28296581972516	5.97021403816129	5.20337898137922	5.68371244231743	6.56006214476551	6.83664174958437	7.72146622044505	5.59578246161128	6.79732528189087	8.12491269190322	4.16025568073352	6.68519123314183	8.52174963348544	6.41081144695333	6.04429312163651	6.40739134321966	5.71361490734814	6.35536698842682	7.30073628566624	8.2533583972903	7.33792120342106	7.37565062381034	8.26437920161405	7.06474123013074
668070	CDC-like kinase 2	CLK2		1196	6.8252306812247	7.12657795665206	5.38529341057659	7.34975334473488	7.24077156081083	5.9001797195254	4.8409722799188	0.443189066857439	5.71571007912461	6.05148989992512	6.80316438630673	6.11171775604581	6.77795523930608	6.75249391920699	2.67324868568925	7.38463089879462	5.8408203417067	6.43121062091027	6.35562973869873	6.6271100280942	2.61070155705561	5.76715777137801	6.28660644960566	5.3633601842955	7.25108940280665	8.12754006679073	6.46410962028866	8.40895137356794	7.9097308621033	8.37986129594925
757264	Glucosidase, beta, acid	GBA		2629	6.37573921182588	9.2361054609693	8.92052109500715	9.99053910126711	7.6715493523118	7.02624397065659	6.49847420070896	7.77233806682112	7.4259754009897	6.67284479139198	7.13103102961799	7.41828336878223	2.56393428674183	7.30541126694681	6.83550559018497	7.9984787204053	6.14661201402168	7.98435919183664	8.70050570223897	6.18989491575298	7.93617887111012	6.43587884098242	7.07700289682733	8.39404943478105	8.10853425766228	8.87841673632126	8.53616872400687	8.82836808640341	9.38388632821961	9.14944117206607
377479	Biogenesis of lysosomal organelles complex-1, subunit 1	BLOC1S1		2647	5.79634231685989	7.39762616821585	7.4897249599894	7.83585203729424	8.37683757084998	7.61406214446015	8.4186707171074	7.25743871866835	7.8171565144033	7.79354636169763	10.0169593739384	8.6632606552033	7.8805370345675	8.0648140801289	7.75301115519537	4.97048819410486	7.58378320977548	7.60004921212443	7.82500283433977	8.10799420001398	7.63524617056148	7.61634457450184	7.87235887718909	7.73681207137539	7.5410451377582	8.68865478256883	9.01705740711606	8.943754658163	8.80420815752838	8.71228482953952
381892	Fizzy/cell division cycle 20 related 1 (Drosophila)	FZR1		51343	4.74710946606248	3.74691139508172	4.99463951257348	5.48541383380691	4.35335791164028	4.19688221465101	5.16318787856285	5.07833865214105	4.88734672741667	4.33229267479687	5.65291529685803	4.62929943502317	4.58161582684353	4.74319401183201	5.4677087213235	4.9963930373159	5.01159881727472	4.86280760941914	3.52166901362679	5.1581405207543	4.57845629504548	5.4374742320101	5.06614847247639	5.32626819254916	5.12533989758547	5.90542661331914	6.71437215012245	5.52872906495962	6.42568253718129	5.67504967732953
668364	Nischarin	NISCH		11188	6.44046025191374	6.8758603621927	6.9933399000787	6.84746064907743	6.36035427421675	5.9001797195254	4.15894517082661	6.39879387764385	5.89162606503492	5.18754345088584	5.22228225428703	3.60204433936253	5.94922702504474	5.67823797419299	5.1966682633462	6.78758448936181	6.10826803868478	6.28020988380856	6.39113629810778	5.93396474507988	5.72219146363524	5.4374742320101	5.61913901799547	5.14810099654811	6.79047408739127	7.42618857270163	7.06782294953217	7.31311178594294	6.80000710101727	7.7157265578459
588019	Apoptosis-inducing factor, mitochondrion-associated, 1	AIFM1	PDCD8	9131	7.52899228697369	9.28070570858701	8.2873700732414	8.59881837144111	8.44681748102381	6.08339516836779	7.73838262554017	6.91138719952238	5.59611189296268	6.59149867565387	1.9540387187161	7.45583635825636	6.39094195675894	6.41061296283298	7.11408050010218	9.05079149958706	7.64870997777751	6.31267131922136	7.71835403864584	2.68317941311693	7.94156327992191	6.39042605682377	7.30802780149614	7.06269515408699	6.34096867790517	9.00349437840246	8.8682689499713	8.38829152942415	8.56650539700816	8.16088503629203
703430	Interferon regulatory factor 7	IRF7		3665	6.99573602829448	8.0746874183751	5.92603546145311	7.60618462318874	4.96214556925053	7.83500490857918	6.73923927064332	6.5526241106202	7.06745988983523	7.07449293730334	1.97613447283165	8.6972749696416	7.9318083099793	8.80012358327235	8.1844767879916	8.36517810530174	7.06322730041887	7.05286671130957	8.1024247971227	6.96539449890277	9.35480969669037	6.11446949443556	7.38439906390783	7.25803641431389	8.74114760004747	5.61934660699888	5.42585433304251	5.38620685274284	4.93825824381388	4.64187843386879
268907	Secernin 1	SCRN1		9805	6.33422504802342	8.02946625299516	7.58130333160608	7.46821054417537	7.98781973664387	7.15592509606147	1.86611607535252	7.09964526494222	3.43837497753253	6.52394029629255	7.74685764876116	8.05618212296389	8.77686525770598	8.78708229389211	6.35174005250294	6.90093633930063	6.80944995905001	7.80734126628438	5.10759782782617	7.3647559198297	7.29546933158116	1.53232485125696	7.29385437171383	7.29052705113384	7.46456429651073	8.85414901590837	9.51957632953416	7.69319425118604	7.71835403864584	7.81107756303951
111086	solute carrier family 22 (extraneuronal monoamine transporter), member 3	SLC22A3		6581	7.42068800669519	8.28327293946397	7.4081820518481	8.28141328223335	7.21142982488893	6.68207786188819	9.87717874232482	7.05818460826799	6.30992024263402	4.77555319146415	7.25408198482477	5.54763719850362	7.0085720511319	6.78793674852027	7.9657694923966	7.79127794875887	5.75337354383609	8.70737147414392	7.38824622312768	7.02443625274018	7.0148895061973	6.88475478358575	6.61071603902114	7.2205156303014	6.24536857059957	8.95608256426236	8.72323332865015	8.65672429755462	8.81589929145271	7.73681207137539
589971	Solute carrier family 7 (cationic amino acid transporter, y+ system), member 7	SLC7A7		9056	10.3248718506961	10.7903621854251	10.1931838342465	11.1143002490698	10.6160926587928	8.8689599157921	8.26134727569534	9.07324244172446	9.38388632821961	8.65672429755462	10.1571012844577	10.5420011874375	9.8696745118141	8.92652148330453	9.38925264141584	10.4137923350571	8.22931108973657	9.41240528045616	10.1571012844577	9.56682540285082	8.52074600519721	8.99206881641833	9.75313680458813	8.21449072961585	10.3104812167342	10.8010639341241	10.9537092866292	10.2612199103723	10.6029384930043	10.9024786974921
683965	Angiogenic factor with G patch and FHA domains 1	AGGF1		55109	5.97652279550369	5.87085474372427	7.16236933774435	6.64247675233613	6.49512512258325	5.9001797195254	6.01076709384095	1.71506620289331	5.20337898137922	5.81419831529878	6.26726376305086	6.56006214476551	6.54391276436993	5.07549607428452	6.25801374607451	4.14338515159728	3.20229124127695	5.53927368017026	5.54352133404960	6.03150858222363	6.09214041703298	4.2201248116252	2.89590846480624	5.58662889318876	6.06728658106334	6.68438044956115	7.50332495637448	6.58324978217326	6.59115220734415	6.6960851816775
156956	Follistatin-like 3 (secreted glycoprotein)	FSTL3		10272	8.26751038956215	7.46753371274975	8.22256030544783	7.84658386519428	7.33375532212165	7.69962626083252	5.52820037452516	7.2641175600687	7.06745988983523	6.44726426467947	6.66121130196756	6.11747049825913	7.0297442279092	7.62871119666061	6.87343009473616	6.79900182358488	7.55243633598366	5.79066688589854	8.07120627350954	7.60787736651167	7.1162726391073	6.96962085657231	6.9571049811106	6.76139795425953	8.31153205762023	9.13668204675491	7.51782241426736	8.49646012784295	8.95732444281347	8.31282692643789
28448	XPA binding protein 2	XAB2		56949	7.61193678976675	7.76708221752323	8.23207143316133	8.5827009449397	8.78381514081011	5.22539263827646	4.00490614939877	7.31489109076437	6.00015193723431	6.61489105476045	6.94573940541137	5.56093885893818	4.88214965987169	7.37492625224516	6.72708647313469	8.09932772959588	7.25078584599283	5.97021403816129	6.65019171441757	4.57754260226889	5.9416084071001	6.96962085657231	6.58783423527885	4.83754809724643	7.3725927576444	7.8103816815571	7.4633302298563	8.83556090539252	8.28224550636648	8.09463738226396
381295	SWI/SNF related, matrix associated, actin dependent regulator of chromatin, subfamily a, member 1	SMARCA1		6594	7.14835912160241	2.40265699107967	6.49935419329037	6.99515083452174	6.06131410687446	6.94019705044857	2.94897484989555	3.42882128644895	6.92169539883645	6.91721702387227	6.75542638304191	6.45273231369535	7.7157265578459	7.0772790678523	6.7068583703251	8.97341906247998	6.57092281745052	1.82723053504043	6.11059068054389	7.3647559198297	6.97765371990954	6.81581776273957	7.29385437171383	7.074158742057	7.48280004446404	8.38111159500312	7.62017698351389	8.73146652911614	7.5046820792601	7.80912734253665
395999	Stimulated by retinoic acid 13 homolog (mouse)	STRA13		201254	2.02568206138084	9.07467207168697	7.8666343434988	8.46807093903397	8.10720234011571	8.75638930298673	7.1644923141914	8.74534084776692	8.38304481110561	8.50672932119164	5.99508695155646	8.4473159951267	8.74061630634894	0.817937303180472	8.42062531978773	9.75068836510336	9.11000803644188	8.4017655007808	9.24251977778023	9.08069312000194	8.90222196921124	9.2292382266131	9.47902960026124	7.9464791042534	9.42411742660798	10.4076765707155	9.76781480387148	9.66800779570372	9.2651100931168	8.76172873916102
31657	CXXC finger 1 (PHD domain)	CXXC1		30827	8.45298016532081	2.41782634984849	8.21766035450107	7.91098729492438	7.7813197130465	8.90619938240738	7.77733195096507	8.17238755015848	1.50358624996032	1.23113001994818	8.55294417097605	5.66583106424421	8.70515651368272	0.96961857988766	8.74452651212944	8.45701962105905	5.93817038429224	1.86611607535252	1.42161959543616	8.56908867992703	8.64504164586057	1.09172125563471	8.88924761011839	8.90156936904919	8.48159360275022	7.77233806682112	7.58483415003427	7.13693726585723	8.41710175024403	9.4202111580263
382264	karyopherin alpha 6 (importin alpha 7)	KPNA6		23633	10.4360374889624	10.0282090571206	10.2359267218678	10.6160926587928	10.9329498971830	5.22676214588403	8.39404943478105	8.98481327689629	5.69147955777315	8.45701962105905	9.05772380722813	8.23111870041811	7.58658355747399	8.46525896019751	8.45601948693488	11.8428664160588	9.9482555506478	9.88981108451062	8.66906579777302	9.62867174924047	9.04456518541346	9.59575919238288	9.33355606687157	9.49895835454415	9.73815110460091	11.8363722168367	11.9084380255501	11.7421266499649	10.2644303698564	10.9100057454289
376180	Folylpolyglutamate synthase	FPGS		2356	6.71940701780068	6.71052662044234	6.72293719608238	6.77795523930608	6.71825014018037	5.9001797195254	4.75329969800308	6.8223023722674	6.01555496575948	5.58750646863	7.09112874191434	4.77913751433662	6.75542638304191	6.66390618792005	6.55599060177244	7.20557427478694	6.39399236563406	6.53254839674059	7.04425628337887	7.3725927576444	5.99275803506341	5.82902520033416	6.15013127689682	5.61469353869937	6.55926163254519	7.2205156303014	8.32204686409074	7.6853695848757	7.07574586119038	7.27664359958105
593051	Heat shock protein 90kDa alpha (cytosolic), class B member 3 (pseudogene)	HSP90AB3P	HSPCP1	3327	10.6688578273338	11.4701720576268	11.3270482957174	11.2616677526354	11.5388504445384	10.6011967047735	8.91340317025048	10.4928510637767	9.68372697293407	9.9084918965885	10.1898085033516	10.5935809955532	11.1697346709418	10.2232762478173	10.2302426346319	11.2156117057549	10.6249594854232	10.2806613309124	11.1441394375298	10.2441740235587	9.86693171580026	9.73485687590637	9.91910727936687	9.48902987708331	10.6870519201864	11.5525980525361	11.9754615653042	11.4031834700679	11.4485367137447	11.1812153234539
248257	Emopamil binding protein (sterol isomerase)	EBP		10682	9.83699776409182	10.6413880406685	8.88988703350624	10.4569817858703	10.4769684741478	8.36843324603306	7.38402958118002	8.4323633000256	9.47902960026124	8.19772775086845	8.96532790310861	8.42489319493331	9.98190164502144	8.19559374810381	9.47686246708285	10.0912709764000	9.48430593426943	9.74183153290157	9.50205492663016	9.12210260578416	7.59948882465668	6.71857709426824	8.14281376758144	8.62504449792517	9.57867604885853	10.5523850524181	10.3466937029082	10.4122005030902	10.4317054868800	10.4569817858703
366599	Prostate transmembrane protein, androgen induced 1	PMEPA1	TMEPAI	56937	7.91920287356965	9.01833467181016	9.13553546233193	8.16903049041529	7.52364160182014	5.51457873701074	5.30807875929519	4.05466441719678	5.16726727825307	6.08954953985237	5.64602909578836	6.52441004436877	6.17918582949231	5.31789627432373	5.21371948733257	8.82757035776665	7.04375982637606	6.671822078741	8.31195405273702	5.87136058925721	7.23217703421905	4.04907306907426	5.93923513427753	5.93252612501345	7.26208726098469	9.05609824334067	8.06763879345243	7.81380625047022	9.52333596285411	7.67425259059497
145112	intercellular adhesion molecule 1	ICAM1		3383	6.39904072261623	9.10597331263951	6.80632018210239	9.39470335492422	9.4826050636697	8.09415312080939	8.52903735251627	7.85202245084453	7.27814711901467	8.23723744043487	10.3669061178669	11.1812153234539	11.0496014762988	10.2968234741752	11.2665669556621	8.488766568988	7.7406404812294	8.0840004039618	8.55294417097605	7.50434236029436	8.82757035776665	6.68207786188819	5.77841300238854	6.83499641078571	8.74452651212944	4.98967724959755	5.24740268693205	5.12094521139506	5.20337898137922	5.12423585364212
669124	Protein phosphatase 2, regulatory subunit B', alpha	PPP2R5A		5525	10.7224661156674	11.0058049980301	10.7040754157498	10.6609573407043	10.8515354104187	8.36321579128084	7.56029147208846	8.89046034165833	8.84124858524213	8.64224205675646	8.76852125214792	9.21200046421322	8.89103342207575	9.4393864526157	9.37481825625194	10.3136364054357	9.52086894112793	9.67060438225185	10.2788577513213	9.69783611402058	9.8192745704484	9.3385179187649	9.17839159489323	8.95986469725207	9.72845753664104	10.6063589805074	10.8642699724891	10.4769684741478	10.6379573997221	10.8568412140326
30066	Integrin-linked kinase	ILK		3611	8.43426347008119	7.79242562661961	2.09877037046349	8.34503548583536	9.04779400544821	8.21413648961616	6.61013565387048	7.81798798520162	7.22216239602722	7.57985641429112	7.61478857338715	8.47630103997689	8.5351046067045	8.53138695143379	8.32258644533915	9.02148243983715	8.32119243534826	5.01716079215746	8.159481201968	8.46032064257506	8.13953026518244	9.1298025740461	1.99983163770926	7.8956824535922	8.27611492448632	8.70050570223897	9.11128559918317	9.06749218347262	8.60103354067607	9.6968894226019
416587	Laminin, beta 2 (laminin S)	LAMB2		3913	7.1934073001144	8.8135994225118	8.6539167136559	8.50253588210029	8.76282208016048	6.54060174160559	7.80283108379359	7.28650146863158	7.47554092370069	6.54507431819151	7.49822793572952	7.92907004058551	7.92414894578548	5.03085044258079	8.47673636807699	8.38192367792095	8.0746874183751	6.80398781904574	7.55171203324027	7.42986618051301	8.45502470857718	6.13929261806332	6.47452127144163	6.72931311822042	9.4046947519682	8.93321857694885	8.9176450742356	9.44111152061182	8.21413648961616	8.77524765241318
346464	E2F transcription factor 2	E2F2		1870	5.24505620834069	6.6713645945276	6.86979528663595	6.1248794095177	5.46667874158104	5.18691910888675	5.33414596933882	4.99953695641455	5.50852342948565	4.33229267479687	5.61893139911784	5.65344896588404	5.56166256286243	4.80712051398723	6.15278415156409	6.39490140343403	5.78382685878198	5.45683525497918	6.03363209282614	5.62920465963597	5.76260280547593	4.70997067419172	5.43561066109849	5.4531299501219	6.85812110165747	6.44022814858067	6.76293420757937	8.00834715014117	7.9308959983488	6.38423729021697
470206	actin, beta	ACTB		60	12.8240968017947	12.7096548264907	12.7649603330107	12.9109146131684	12.8103628305744	10.1179347434768	8.43528407093233	10.2441740235587	10.4769684741478	10.9665261088347	11.6707596219174	11.7983268712171	11.9674636257221	10.8690040216145	11.8206100234402	12.7649603330107	12.1298949456904	11.8428664160588	11.8660739664477	11.7677700612332	11.6224345612448	11.256528573378	11.5905139284134	11.7601094799868	12.6917144963397	12.8838332138728	12.8414973441786	13.2255396738875	13.3048198063707	13.2573417347899
53322	General transcription factor IIIC, polypeptide 1, alpha 220kDa	GTF3C1		2975	4.67526478762393	7.18369693380861	7.34495220592965	6.88475478358575	6.7931666536954	5.09255075929272	5.03315288043109	6.10434760898765	5.93784309771723	5.2513026262024	5.37984443797075	5.61377781033327	6.0665490732985	5.54352133404960	5.97073936696466	6.47623067595875	5.82902520033416	6.15988729994405	5.55366623048021	3.40431054702012	5.79509436079173	5.2682976971827	5.09921462677154	5.11109273912343	7.46456429651073	7.43712283882142	7.58692880931418	8.45178944356275	7.61304031976506	7.5270644444811
30029	Talin 1	TLN1		7094	8.70618480163784	9.1567834149923	9.5880578707285	9.23262847508637	10.0219599615899	7.46226355955072	6.78140267000157	7.3817566304386	7.48931374993988	6.78162988226299	7.5940774674569	8.25695661167335	8.24522481111055	8.14593988255354	6.43966416327213	7.63358996830457	7.7585171080194	8.19872011032326	8.790956086895	6.55767793353284	7.2553042662314	6.45184583626952	7.05905449949849	6.81921625201332	8.6312361237683	8.6037746424567	9.26982795802343	9.0404653603237	8.77310910677815	9.15349346878274
434337	Tripartite motif-containing 28	TRIM28		10155	10.6785590135820	10.5039489098008	10.4137923350571	10.204495076527	10.0568886023740	7.8001107550654	6.30234363682044	8.55509145378033	8.67346476353168	8.12264577313588	2.15710768701508	9.22338688159843	8.60952524415626	9.17344449492906	9.62867174924047	10.7524513371427	9.95672662579774	9.14510076942756	10.7380448163627	9.05886686654674	9.53588962582157	8.95099170984112	9.23768046620277	8.66273948247882	9.34013150520143	10.8059242870198	10.1467285446453	10.6650672725088	10.7130427365867	10.5139158594120
195748	Nardilysin (N-arginine dibasic convertase)	NRD1		4898	8.69130363030282	9.0778781829089	8.76025363947344	8.81638993671968	9.16110555641055	7.82694162905837	6.94921594134893	8.25965196029871	2.93208390290493	8.02039203967971	7.79689662908814	8.29710128246581	7.47698499938403	8.70050570223897	8.00682049613589	8.91166435077678	1.74076193652944	8.5296299407966	8.84016502442393	8.59502994152795	7.77414548116562	6.8974234931979	8.04115746687102	5.29181183884295	8.72323332865015	9.11000803644188	8.84368257287413	9.07019858758055	9.18568929241868	9.10185511556538
234129	Solute carrier family 24 (sodium/potassium/calcium exchanger), member 6	SLC24A6		80024	6.75830049913785	7.50247111353987	7.32300614649194	7.47085190514781	7.72855592994522	6.20966774267292	7.13658234950989	6.3238386284908	6.47452127144163	5.56440277106264	6.4911155811128	5.2861044311131	3.75613993191876	6.60977960927246	4.65168663162743	4.42376750090034	5.96301329433685	6.84932096479168	7.08637241838123	7.07471639671066	2.89070218975985	6.03896863597881	6.50747238592906	6.15575621255445	7.05627500237816	6.97563051276038	7.05286671130957	7.58413943735725	7.58378320977548	8.5280107232968
489568	DEAH (Asp-Glu-Ala-His) box polypeptide 9	DHX9		1660	9.44111152061182	9.39073746378404	9.52885512735042	9.82769339028815	9.42295905224415	7.1653441612409	7.8711066161277	7.83730187539081	5.16548362216581	7.51239933876566	2.27427109893292	8.00452299281748	8.36025589694376	8.1269355873983	8.15381540521105	8.76852125214792	8.61434844667551	8.45820257946066	8.68505460897962	8.3438150465042	8.16533366534646	6.21470306282542	7.27375289391213	7.15845725748259	8.44363427088222	8.85199761442437	9.54042221291329	9.08244493608714	9.34385537617487	10.3935404701393
379313	Selenophosphate synthetase 1	SEPHS1		22929	7.06642219434335	5.94637367435298	7.36506297291439	7.11165982212361	7.42263660365289	6.79143491152907	6.5111833873943	5.19883789214158	5.78792487021388	7.17522142173143	7.56622029556847	7.49740516431844	7.21980938524226	7.19001607788061	6.7331410683802	7.57611678844731	7.22169112199292	7.37598326463278	6.68551062863971	7.54557572452681	5.66422926097408	7.21163728621096	7.465122831821	7.17050841023648	7.00577891491813	7.68495887839534	8.40676570826209	8.66659964460755	7.29514931841996	8.3859483166588
152720	twinfilin, actin-binding protein, homolog 2 , PTK9L	TWF2	PTK9L	11344	6.86618514939557	7.50574046364816	6.47466681517222	7.13622734582836	6.62274250321511	3.96707665258488	4.7690075535812	5.52442045943548	5.93784309771723	4.73247787782931	7.31139801206113	4.46604741238289	6.31337760886205	4.80712051398723	6.263595917286	7.10432255848477	6.1782923156003	6.78432858354451	6.5467755569163	7.71069267331399	5.497245503329	4.8092695265916	5.16437615041698	6.71559366394931	6.80339238700213	6.98022030771974	7.58563622882431	6.78942571995725	6.91527278781298	8.02341073838
663838	Transketolase	TKT		7086	12.0249930973987	12.5172325328528	12.8414973441786	12.6226819136392	12.6917144963397	10.4211634907906	9.7008411730370	10.1136040873439	10.5694094541220	10.0183692533042	11.2043804522864	11.4754962760764	11.4565465550403	11.0914559643622	10.9376970351551	12.1394055822347	11.2209483130282	11.3820705919485	11.8206100234402	11.0665131076541	10.756491665283	10.8690040216145	11.2075798647207	10.6870519201864	11.3553841849615	12.2786320731802	12.5290498275591	12.6781566817960	12.4535333588357	12.2831894384818
259087	Glucosidase, alpha; acid	GAA		2548	7.28822376994967	7.49067129171361	5.40059575364957	6.40986003116825	7.39475179077057	7.70075356148314	6.05959868533459	6.14147243575175	6.32398822764291	5.77238766168595	6.97891623086722	7.15623463781484	7.94484047278196	4.27057625238879	6.7068583703251	6.80031691434994	7.44612011281555	4.02285939748991	6.93200164884744	5.22604355282835	7.27588933699383	6.40739134321966	5.79634231685989	5.89801007227167	4.4789293228242	7.47408699155426	6.7934529874918	8.026625297953	7.4292425863988	8.45080028963034
526042	Deoxyribonuclease II, lysosomal	DNASE2		1777	7.7901379687067	2.59680307669622	8.40271272360819	8.70377218643661	2.48295649502243	7.37744420965989	2.43266557957977	2.28426156603772	8.29710128246581	1.47446890290961	2.3696431730003	7.56029147208846	7.37068244131037	7.50762442766375	7.17967009039929	7.56798705304965	7.070733566935	7.55279839662788	6.65191478767416	2.11816571635820	7.37068244131037	7.97795864276843	7.3917845479275	7.17050841023648	8.66448509070334	9.24729279504683	7.75722898177648	7.72553042284327	7.49639443802993	7.6182075184646
162472	Protein tyrosine phosphatase, non-receptor type 3	PTPN3		5774	8.4490972908561	7.59622962990436	2.35060466639403	7.64501803865913	4.76100411140256	7.38588922009053	7.00912081486108	7.45103720507388	7.24709010740157	7.16369123053701	8.57021238583939	7.85743667416474	7.47554092370069	7.99563013493671	1.99983163770926	8.23906869911203	7.96660739039401	8.54933133701393	8.27882196445393	8.4260995780056	8.49588515754605	7.8923244803351	7.90383371188999	7.59860555487814	9.35480969669037	9.05474218833133	8.5103196290531	9.13553546233193	8.26651773721652	8.7169020677609
148609	TNF receptor-associated factor 6	TRAF6		7189	9.7337572511132	9.92692272794275	8.7622755132338	9.42918725681753	9.30232491272869	8.49890120233673	7.2769899135827	7.51085954252715	8.12953071431038	8.27920965837632	9.44432385519927	8.8770820824583	8.21104470251868	8.61764921616973	9.1644807579061	9.88981108451062	7.33080429609578	8.40945669784591	9.18018432151926	8.52232062913654	8.57193822086151	7.93430299162136	8.12264577313588	8.07621337616236	8.00083367447933	9.83168245102453	10.1179347434768	9.22157213230646	9.57749271510515	9.66391175972846
299661	GATA binding protein 1 (globin transcription factor 1)	GATA1		2623	6.66971662851271	7.58413943735725	6.49256013023168	6.95676634249284	6.26438944654345	4.77009930279021	4.49084123175216	6.87184657210435	5.50852342948565	5.18754345088584	6.54415549691066	4.82849002782479	6.4294846076793	5.31789627432373	6.19205086220077	5.50329425724726	6.25759387185536	6.26590081566853	5.81069364714865	5.67672146634499	5.89628411333721	6.27843063739558	4.14396631637213	4.41659712638878	3.84199222127199	7.12338409949675	7.19236273892337	7.14619839452653	6.78432858354451	6.99769499442912
234149	Fatty acid desaturase 1	FADS1		3992	9.26194508355591	10.0118631208570	9.48551256689956	10.1646730406592	9.75313680458813	7.54875156527267	8.56018295134697	7.85805252593382	7.48931374993988	5.4573421725445	8.46564926899055	2.14147469928949	8.37155093639117	8.16841462686918	8.53022228577071	7.4654744463106	8.714149944922	8.6081351374	9.2171793372363	8.37155093639117	8.20439462694013	7.61634457450184	6.9179615541421	7.34545437491197	8.69935892598883	9.87217787449622	10.0013083848609	10.0157747908013	9.73815110460091	9.655034469747
347070	C1q and tumor necrosis factor related protein 2	C1QTNF2		114898	7.9898506623874	7.71241522593401	2.35060466639403	6.90557684838357	2.56393428674183	8.22360813325774	4.28829898060961	8.51678778604777	1.23113001994818	7.75385934565856	8.11353901213583	7.08240315338746	7.8498206368456	6.05845607748129	7.96068705134265	9.56682540285082	7.32391727683614	7.60424089753353	7.88089002607282	7.60787736651167	7.89925043071651	7.54185966244403	8.08824162834267	7.228430114918	5.91849455509972	8.83791505649541	8.68402137028682	9.22514037378156	8.28224550636648	8.0480659597201
115295	Damage-specific DNA binding protein 2, 48kDa	DDB2		1643	7.7948225644163	9.00292874790825	7.73347297841998	7.52985466850859	7.57503869128406	7.35617324290529	4.62598621329876	5.11833330748173	5.93784309771723	6.2754516485765	6.19684113846157	5.72030271270365	6.77378939476027	5.66000537326937	6.08549044369866	8.3705785067801	6.6388139352035	6.92917931812361	6.2106907614379	5.95490157991147	6.67246719169533	6.77795523930608	6.28660644960566	7.39126289829809	6.5179010697369	8.35203836078163	8.5255339882497	7.82842911803305	8.50206786542366	8.06284805741735
713218	Mechanistic target of rapamycin (serine/threonine kinase)	MTOR	FRAP1	2475	5.26371550184165	7.56064337509138	6.8307297013982	6.7455960411303	6.51446887613318	5.27809946834073	5.27924323818047	5.65315709402482	5.20337898137922	4.43184190893725	6.22221254202093	3.54089951976765	5.76236984299014	6.15575621255445	5.77713418803086	6.87215507553403	4.17525739281816	6.08475793951199	6.23108246213051	5.53683738061989	5.46259105587743	5.89228034310688	5.06614847247639	5.26107550352623	6.02271755745276	7.36195029584998	7.37201768210672	7.33792120342106	7.20557427478694	7.81650735689143
1671903	Luteinizing hormone beta polypeptide	LHB		3972	8.3760462038381	8.35247853142633	8.7257954054635	8.27199169315313	8.53022228577071	7.66323189653	6.25224983810431	7.58793864927318	7.60315187846178	4.48712769231981	8.04283997813307	7.13482927815863	7.27165597716192	6.33671839997052	7.0759819005319	8.88988703350624	7.55243633598366	8.49703486908303	8.71169068560767	7.64837317001809	7.61406214446015	7.58044022143828	8.14132034617436	7.82500283433977	9.0901092049689	10.5652689878641	9.85056562965579	8.61517176403592	8.71473872374469	8.67809965892694
740948	Filamin B, beta	FLNB		2317	9.41634148258421	9.68179661712326	9.78958107886446	9.7608979774584	9.1999986085265	8.35359014749633	7.32601355506451	8.65866168966309	8.37522107693319	8.35359014749633	7.86084248426867	6.38212902195988	7.06591320390996	8.96400959176175	8.37563369937545	9.3784904710077	8.05226752252223	8.76025363947344	9.3453766901861	8.55188320572433	8.5296299407966	7.61634457450184	8.45502470857718	8.02911910226364	9.16374582375624	9.88705132803928	9.83980279092055	10.7130427365867	9.53129534600634	10.0519012308419
155559	heparan sulfate proteoglycan 2	HSPG2		3339	8.05529580151383	7.93331406953395	7.80099604328796	6.79900182358488	5.09211013440269	6.11039806828698	5.76026201002758	6.06262855795586	2.11816571635820	5.58750646863	7.06850121877202	6.37363678655107	6.83886791629669	6.63548566619234	6.12200638204504	7.90570127077843	6.12629915715581	6.45151475022586	7.06513608505719	7.04719036479507	4.79713285804107	4.22653413730133	6.04143354504906	5.66962514420085	7.97174987299967	8.478478000084	8.63562184294462	8.59881837144111	8.59996861540186	7.83500490857918
503355	Protein disulfide isomerase family A, member 4	PDIA4	ERP70	9601	10.1467285446453	9.82769339028815	9.42918725681753	10.2302426346319	10.2096378821687	8.84501393314654	7.08286266497025	8.25965196029871	8.05955303775045	8.20635014335506	9.06877895813283	8.4367043611889	7.74760648959746	9.15027683617962	8.47465738222726	10.3840034488896	9.106771488578	8.98544029577185	9.39779927324239	8.88116310664268	9.4102126834037	8.08782377618154	8.10124623356976	8.20154205218679	9.4897593822807	10.5252216284833	10.2644303698564	10.3397996530285	9.9956473800299	10.0938467245778
239664	Clusterin	CLU		1191	10.6121884222069	11.6061940085213	11.7421266499649	11.7788307829664	11.4967709662528	4.09426146315919	8.63960851637014	9.57345192016781	8.99482476914572	9.45073455896409	10.3906368218553	10.6160926587928	11.0757430743842	10.5610035030737	10.2509668937347	11.4096899384934	10.1376515075279	10.0369797236055	11.0470956202506	10.9286600999593	10.1861347204224	9.28308424920636	9.1298025740461	9.82964348903646	11.4967709662528	11.7873268583144	12.083779105064	11.9714681378275	11.6893992103524	11.4031834700679
290036	chibby homolog 1 (Drosophila)	CBY1	PGEA1	25776	2.91085863237479	5.18324276652136	6.23043792191453	5.8261534277601	2.59680307669622	5.71851791960694	4.34874607997252	5.45667932447184	3.68627888439947	5.53508216097954	6.0346993800883	6.09214041703298	2.99325730280013	5.36305682440884	5.50494466669077	6.64013096608985	5.67823797419299	5.21434986451787	6.00285350582849	5.76912392341719	5.28848647904682	5.2682976971827	5.19470200516447	5.56166256286243	5.53766689181116	6.38258982773785	6.88211927704308	6.41798279902816	5.90655765683555	6.03985287661679
342606	Cell division cycle associated 8	CDCA8		55143	5.89504793775057	5.95502283239212	5.89288054176765	3.88469683141138	4.65821148275179	4.36810359223119	5.50221496914246	5.31851420806832	3.19884472878562	5.53508216097954	4.25251573646662	4.60139468868005	5.50093640007618	4.70525397611897	5.42967157525483	5.25865965136243	5.53464517667892	4.66934886224349	6.08150871977692	5.07485245375015	3.09836529196977	5.89228034310688	5.31411711968223	4.86946695069469	2.27308618802422	6.88279548226716	7.16605937195105	5.48866641796622	5.7371262334243	6.80568510620379
504252	zinc finger, CCHC domain containing 9	ZCCHC9		84240	8.9586782265505	8.33264803157386	8.06701774745563	7.67799766939502	8.3260525893554	6.8372083459841	6.54987262481931	6.47509219613186	6.57193261219794	6.97695477682525	6.88787573754353	6.7331410683802	7.05076230569948	6.36537740176849	4.87436898493073	7.22602327337264	5.1834808609789	6.96899978042325	8.32771935479744	6.85283170384962	6.50402959853174	7.07893538572726	5.22821104792806	7.04930459361218	7.1971358031037	8.7025850552014	6.8455208180532	8.16134628561881	9.1676874250973	9.3618062820821
133520	Calcium activated nucleotidase 1	CANT1		124583	5.07868927464029	8.97915205409324	8.74316631045754	7.99884050591482	8.67541431840613	7.64501803865913	6.94921594134893	4.02885027174763	7.73071190788854	2.56959030490371	7.95914642822178	6.61113163283827	8.39809014612981	8.24068387877236	7.81217377601514	9.97441099890199	8.32204686409074	8.18761818621903	8.6595681740511	2.89170219489356	9.24729279504683	7.58044022143828	7.65491423606892	7.77692281550969	8.56571033564743	8.58882847189646	8.46433513433846	8.32258644533915	9.07019858758055	9.26894052350316
341304	CD36 molecule (thrombospondin receptor)	CD36	FAT	948	9.15440831309007	10.0343964447214	9.95927784394742	8.86183052110883	8.775821585256	6.47236540289813	7.85430468650302	6.85249178003204	7.38886199448085	7.35176339117506	8.81470140204779	7.7827877975276	4.61796722874781	7.31541973946334	7.5721437318513	9.23689317851723	8.44020876113687	7.71352355472245	8.0269457651861	7.8498206368456	6.86831337610442	6.46934506202644	3.91000318287731	4.52990098862459	7.92502770440749	9.0404653603237	9.4202111580263	9.0404653603237	9.63769711926618	9.17641057848788
564592	SRY (sex determining region Y)-box 2	SOX2		6657	9.0404653603237	7.04116214660234	7.54749468482167	9.75068836510336	8.78381514081011	8.08279580406081	9.15804306467663	7.94156327992191	7.94054127286052	7.57985641429112	7.39535611440643	8.52394544351655	8.47158499490408	7.56768618095237	8.44581460848225	8.71912740531919	8.6632606552033	9.02655233767149	8.67700764801506	6.08445521270647	8.06732830387223	7.80805363976788	8.91887406140859	7.4897249599894	8.27089880615643	9.80733157850494	8.95608256426236	9.56682540285082	9.33545999264688	9.32169761728799
195120	myocyte enhancer factor 2D	MEF2D		4209	7.89667738536277	6.27393808858956	6.02032524226679	7.56531228656136	8.40786623038366	5.80359368442359	6.97248381131185	8.71109629688919	10.4171696155328	7.7410355603713	7.56244701133162	8.45701962105905	5.36201315642299	8.18284438871903	4.77555319146415	7.45131764688377	8.3672049515253	6.96436975028691	8.33786010638181	6.69502561133013	8.5103196290531	7.95789802696727	8.25801121078875	8.04672889779122	7.9657694923966	5.46008153583511	6.86481616234548	2.76655993892481	2.20332507853591	2.40265699107967
525221	Aldehyde dehydrogenase 3 family, memberA1	ALDH3A1		218	12.8554924572340	12.7840928513721	12.5831196272677	12.5075279421761	12.3654634800350	10.8098369782272	9.20813349336188	10.0024548458858	10.2542352845655	10.4397022170315	11.2156117057549	10.9861844235212	11.6893992103524	11.2340554702474	11.3756643178524	12.8103628305744	11.7241916340136	11.4754962760764	12.3957164162852	11.4824793060633	11.3424618473792	11.5525980525361	11.3965086524715	11.4352483981986	12.3102043090220	12.8414973441786	13.1029037891685	13.1493101957274	12.7840928513721	12.5966576006729
502583	Cysteinyl-tRNA synthetase	CARS		833	7.16324600947793	6.29916772555806	6.97212776388256	7.54129703872244	8.26349693685668	5.04426441208937	3.10451847167700	6.72560155159136	6.24050303601591	6.55706374917437	7.22531255000804	7.70919486369951	7.59249594986296	6.16735938875576	6.5467755569163	7.40227299362063	7.61343875021176	7.14478907127801	2.71515832696003	5.9125971910274	6.40197068900896	5.68407301372521	7.03920035578183	7.074158742057	7.36224771458088	7.69962626083252	8.18358187434396	8.24224966528024	8.8217256399297	7.27664359958105
588480	Splicing factor proline/glutamine-rich (polypyrimidine tract binding protein associated)	SFPQ		6421	8.2841156073403	8.67700764801506	7.6921084914312	7.05905449949849	7.73716041689077	0.252955199737426	1.96512889660361	5.78771868854965	6.50170292174412	6.13816776643063	7.95483828170013	7.09112874191434	8.00293644542785	7.38824622312768	6.50977688312844	8.64622715421108	6.40595184576142	5.4738629326328	7.61406214446015	7.46614004441753	7.1498096525106	7.0003816628715	7.09825550810226	6.91771914721115	7.39607782462705	8.39659563662416	8.9889870177405	8.14317809544852	7.31210690032362	8.68231826602118
773349	Minichromosome maintenance complex component 7	MCM7		4176	10.5420011874375	10.6989779968813	9.7997987333372	8.80070518805514	9.68798250441807	1.47446890290961	8.31625453243523	8.73741855214007	8.95536428896774	8.14032254416778	9.3784904710077	6.67719666160948	8.40428904536174	8.57602482441034	7.05392880206778	9.59386142833043	9.27556755648946	9.1298025740461	9.44863619398332	9.26616349649267	9.4393864526157	7.72468329518572	2.35060466639403	9.24729279504683	9.63042505787424	10.1804563580273	9.83699776409182	9.75068836510336	10.4801557251742	9.87460432938266
416460	postmeiotic segregation increased 2-like 3	PMS2L3		5387	7.30541126694681	8.0648140801289	8.21484488265665	7.00771321407105	8.55509145378033	6.64721999933793	7.46401847391179	6.69178922855896	5.59262166940187	6.44726426467947	4.88684452815324	2.33273059098445	8.50971823205407	7.95483828170013	7.39126289829809	4.9304940737012	5.71686286403427	7.23387257670624	7.3725927576444	7.27093492635779	7.27131231451626	7.0524993518612	6.86447552462867	7.86491771127674	8.10929137112038	7.96104466204309	8.25913262113109	9.93761075924379	9.5266480432426	8.0032897974485
563024	Lamin A/C	LMNA		4000	10.2509668937347	10.3466937029082	9.85859988484005	9.41402350601362	9.42918725681753	8.28091650798382	6.42087671714811	7.81178307816443	7.92004996527498	8.72041809909886	8.9425095408236	9.106771488578	9.07858177783226	8.20985321480325	9.00885354904158	9.48671819117683	9.03033960368191	8.76610311770145	8.9828699977661	8.4270993576687	7.81683197215937	7.86259971996728	7.76860356124005	7.64234924766281	9.0062992224477	9.89232751284338	9.9662243764828	10.3906368218553	9.5690490782368	10.0369797236055
265122	Secretory carrier membrane protein 4	SCAMP4		113178	6.79623022729639	7.89002053909302	7.66394806037766	7.17120562370536	7.38069147895376	6.18444414554574	5.39966326062799	4.76219278316232	6.81953177008126	6.71905647126947	6.27778705271736	7.28322831553015	7.14943843359503	6.70084835947188	5.12956018082243	7.01856396336467	7.01954516069897	7.80912734253665	7.35617324290529	6.60278083600017	6.91617492390771	6.70322318777295	6.06131410687446	7.57241586702267	8.43714457289223	7.46150586860704	8.29606765801208	7.90534006396494	8.11998365597377	8.3760462038381
380738	Transcription factor 4	TCF4		6925	8.90696741032133	9.6221412652477	9.89232751284338	9.8531502603432	10.2968234741752	8.78086515500236	9.11875495128438	8.35925088365509	8.27199169315313	8.97764811639566	10.8098369782272	9.0967387947806	9.34013150520143	9.59026988073728	8.45080028963034	11.2456781389742	9.18298743094684	9.08542051082036	9.49689838106811	9.4202111580263	8.32204686409074	8.33159721681403	9.41634148258421	8.24476281812927	8.9425095408236	11.3691805966426	11.8917780293836	10.8139390375909	9.23162678101722	9.87217787449622
48517	Pecanex homolog (Drosophila)	PCNX		22990	4.45115893385294	2.50095530343693	4.27532183391962	2.99784690668728	4.24869563294245	2.17524159881808	5.33414596933882	4.39298646528239	4.36546420030639	2.87727597823776	2.69334755993983	4.48658047698281	3.91064918143418	4.43526224286862	4.33759367611741	5.69147955777315	3.29339889018059	3.42243102376622	3.6537181069424	4.06482801882573	2.66808608268294	3.55361714352419	4.20638814816464	5.23391602401868	2.98037822909277	5.36170479422046	5.24740268693205	5.22539263827646	4.79083306372213	4.76937044576772
591262	Kruppel-like factor 6	KLF6		1316	6.8818147360855	7.57985641429112	7.67656202892529	2.27427109893292	6.36198318351126	6.39425821669127	5.35035177068534	5.28250930624084	6.08367287432012	6.32824174421556	7.45520846063176	7.03472479864966	7.29315322984447	7.04570938395884	2.98856533200123	5.99208842969385	6.34338744049922	4.8658706694289	6.00285350582849	5.91477643388783	6.60109820598002	6.27843063739558	4.7143107374867	6.04016987733862	6.56979637588124	7.8128366625393	7.12410183881656	7.81139227447972	7.20953433911949	6.91557668246586
668088	Hyaluronoglucosaminidase 4	HYAL4		23553	9.36965808880107	5.15579495345697	7.7157265578459	6.94438671867737	9.22787899678537	8.14281376758144	8.6863392300207	7.56738524609554	8.07427907735613	5.99827469352897	7.74602455060984	8.79954174392818	10.0036003965803	9.64438474108957	9.80980993604466	8.4323633000256	9.56077295142284	9.49689838106811	9.80980993604466	7.34265403129937	8.21766035450107	9.53702975448322	9.70533926402187	10.1434474513542	7.81959889214579	5.69183350124703	5.78360076929057	7.4391274494677	2.38434495918557	7.38486269643254
704566	Seryl-tRNA synthetase 2, mitochondrial	SARS2		54938	8.79726699300237	2.81781994875249	6.0764330596796	8.82113231218804	8.66770760012282	9.01219488564855	8.44531024609936	8.31751780226917	8.97239972723381	8.85801754810785	5.05656912395201	8.5898071232106	2.17524159881808	8.93630220826653	8.85996343774732	9.08715592832763	7.55966980892289	2.30420140547479	9.37573397160783	5.29798075644886	8.57698788305879	8.71834923547146	8.80503095025295	2.43876659085271	9.11433325126062	8.87016479479808	8.50159969687108	9.01574572583718	8.89559241784745	9.04340999836914
725570	Aldolase A, fructose-bisphosphate	ALDOA		226	13.0326956519295	13.5329727531111	13.4974954731313	13.3048198063707	13.4464555585472	11.9674636257221	10.1500010174129	11.1697346709418	11.5763735240006	11.0470956202506	12.5172325328528	12.4285443491322	12.5432119672612	12.5075279421761	12.9109146131684	12.9109146131684	12.4750028276158	12.0954361134941	12.2997326883007	12.0639439011325	11.8428664160588	12.3957164162852	11.7601094799868	11.9966962961862	12.968872692609	13.7419037874054	13.3970533262556	13.2072385958697	13.3970533262556	13.5329727531111
152743	Solute carrier family 37 (glycerol-3-phosphate transporter), member 2	SLC37A2		219855	10.9238871372740	9.51347477771374	10.5420011874375	11.3008470470116	10.0714475861602	8.76025363947344	9.93129943594242	9.92459869762666	10.0489304807246	5.39802778068070	10.5860356048659	10.2441740235587	10.1536628929131	9.57749271510515	10.6046781808826	10.5075637602913	2.32358669695761	9.76274710691993	10.6989779968813	9.9971111672732	10.6011967047735	9.84758256693146	7.76051239348948	10.0654312392772	10.7307034816599	11.6061940085213	11.0757430743842	10.7380448163627	10.4360374889624	11.1028936256170
1521706	Jagged 2	JAG2		3714	11.2107721976313	11.5092667201885	11.3077244010262	11.0560262116816	10.9643253409276	9.36013062769877	2.77649883231434	10.1434474513542	9.35123673799818	9.9482555506478	10.0883459597712	9.56077295142284	10.4537633550107	9.73155436958553	10.1700264581761	11.3359660764460	10.6160926587928	10.4537633550107	10.4283421160427	10.2375108659386	9.25418274411272	9.91461399470283	8.7567203014059	8.48510713416071	10.8608561461718	11.4701720576268	11.4096899384934	11.5463846927751	11.1697346709418	11.3691805966426
769861	CD63 molecule	CD63		967	11.6061940085213	11.3489315278646	11.4031834700679	11.4096899384934	11.4031834700679	9.9985734708339	2.79565295394440	8.52074600519721	9.9713583930073	9.49048851878694	11.5525980525361	11.5609516542643	11.5763735240006	11.7677700612332	11.0122325489633	11.4824793060633	10.7956954098939	10.7480705483161	11.1866862501962	10.6650672725088	10.3749468594446	9.4393864526157	9.04456518541346	10.1025557797656	11.2456781389742	12.1481731915282	11.5967161937988	11.4565465550403	11.8760984255607	11.6893992103524
436044	Protein tyrosine phosphatase, receptor type, F	PTPRF		5792	4.20235634281531	7.6442307681841	9.4342698135464	8.18358187434396	7.7400342258486	8.76732058905839	8.01542413922832	8.60103354067607	8.52232062913654	7.13460161791203	8.42370745715504	6.09916268182246	8.49646012784295	8.78590418700477	2.25117496566392	6.20780360193854	7.47609721366329	8.3859483166588	9.24917140176895	8.61573321518283	8.31503590429777	-1.83976602367221	8.57753807597065	8.2481444142608	8.68037197353348	9.6774840592567	8.3260525893554	9.07467207168697	9.17049633752324	8.58882847189646
505524	Lysophosphatidic acid receptor 1	LPAR1	EDG2	1902	8.6539167136559	2.91085863237479	2.58382067633161	2.38434495918557	8.5969268149413	8.1790524914074	7.79449031071812	7.56099519227884	8.07949811736077	8.24686354210519	8.20485618841873	8.26651773721652	4.15343979403435	8.26393813667781	8.16809320408732	8.15433442638265	2.35948825439475	8.3559075607383	6.82840988547065	8.5969268149413	8.44167076327537	8.08561994241233	8.20439462694013	8.30216581367616	8.43289678894493	2.55772300543231	2.43266557957977	5.26981984561989	4.67564891314251	2.46922139600312
685418	Polymerase (RNA) I polypeptide B, 128kDa	POLR1B		84172	6.63592655105639	5.86084221422076	6.96698610589999	7.05651870736914	7.66360178815188	6.8511795273534	7.30297968675277	6.9842619707143	2.9628125614921	6.76066816045218	2.64388540861891	6.49219397772687	6.85012728223751	5.66000537326937	7.10838616210033	7.65456103018157	4.15817696020427	7.21050512723533	7.18213047770455	6.78567718143688	7.29546933158116	6.85283170384962	3.27973222439538	6.26590081566853	6.99013565708252	6.49601942577001	7.65105691536273	7.77369634986919	7.88157871375778	8.1269355873983
666029	cadherin 19, type 2	CDH19		28513	6.2558714822259	6.58896482649074	6.46051732985077	7.51212034779659	4.72761892839098	5.58189560877353	5.47455053538159	5.91958938255588	6.7014933470559	3.65932485193538	6.54415549691066	6.62339511674097	6.31337760886205	7.18528966836115	6.23976777100949	6.39599610134537	4.25062823502767	5.041166999641	5.81120192113764	5.03357982284488	6.57871627154577	5.08574337974852	7.06881645076336	5.91504846606744	7.58197364729137	8.16435204128353	6.61399665935362	8.3859483166588	7.27531431875207	7.3565392551654
277273	Rhomboid 5 homolog 2 (Drosophila)	RHBDF2	RHBDL6	79651	8.05016082105438	4.70468814273189	7.50935509343966	7.40312490883829	6.50139051632096	6.25460453706987	5.51526517802096	2.57045524499440	6.74066278793413	6.52394029629255	6.47623067595875	6.46267776313681	6.51286957822558	6.06200172066387	6.59745753825079	6.15278415156409	4.34769929164539	6.15988729994405	6.74238661826271	3.13242456484916	6.52839575043531	5.3163752018308	6.31897948623727	6.40319382250038	6.63000210059827	8.06763879345243	6.5771704124653	8.25033500134118	7.77864193343049	8.00760065664579
454476	Insulin induced gene 1	INSIG1		3638	7.33937477541203	2.93208390290493	7.42686637152805	6.44938506485989	5.00197821133184	6.05640654987583	7.06591320390996	6.72560155159136	5.31894317305747	3.18811492706538	6.81581776273957	7.0054985930007	5.4417898547588	6.84780180979061	7.12051826064232	4.72511814138191	3.10798178917535	7.0085720511319	7.33468521693312	4.88356649180132	5.89628411333721	6.70322318777295	6.50747238592906	6.76139795425953	4.67049938937929	7.44345751393554	7.31246352960016	7.62595778530249	8.00293644542785	7.86387671620694
756918	C1q and tumor necrosis factor related protein 6	C1QTNF6		114904	7.01404484294108	7.91358251804473	5.01404660905741	7.06322730041887	7.18645639522438	4.94396063254885	7.21079678337437	6.39879387764385	3.45077171428434	5.53508216097954	5.26625281320477	6.71940701780068	5.18162500850765	5.80272984864101	5.12956018082243	6.5619271535175	5.47858737226324	6.09738377094325	7.13133049034588	3.65055008143343	6.04429312163651	5.71149272845635	6.68281550758262	6.63445242794816	7.2719995579636	6.55315997141716	7.14943843359503	8.18551209615589	7.1374531419677	7.45209524162287
284740	Farnesyl diphosphate synthase (farnesyl pyrophosphate synthetase, dimethylallyltranstransferase, geranyltranstransferase)	FDPS		2224	10.6609573407043	9.85859988484005	9.92459869762666	9.22514037378156	9.64438474108957	7.97374633495863	6.78982003014836	9.3669673951441	4.63586733041055	7.33236760584755	8.23987711434258	8.76501142178897	9.15532257764234	8.49646012784295	8.0746874183751	9.21623501788707	9.49511191575732	7.65526735550428	9.7008411730370	9.35480969669037	8.18551209615589	9.13390265602724	8.77133184960206	8.05060710438941	9.3385179187649	10.1646730406592	9.9849552209742	10.785414081313	9.65084943826004	9.05886686654674
111007	Cytoplasmic FMR1 interacting protein 1	CYFIP1		23191	7.67289445937463	5.85272702927922	4.35713436881164	6.50525881644462	7.67009214670529	7.3369949457937	7.34975334473488	5.91958938255588	5.4013985661254	5.85715345944471	6.43819847992754	7.5563450105825	5.92939794201317	6.3234467476542	6.19205086220077	3.57969902984818	6.8974234931979	5.97873018695876	4.91153420795585	4.4789293228242	6.84814288984703	6.77795523930608	5.96301329433685	5.26107550352623	6.47466681517222	7.83585203729424	8.4694140398746	7.23508444024955	8.06284805741735	7.3768460689534
589647	Polymerase I and transcript release factor	PTRF		284119	8.33348211749196	7.99365876675777	7.31774675753126	6.9927773925239	6.84484716604477	7.76051239348948	11.9868147613882	5.94591382939727	7.41949395593244	6.82711483885929	5.38529341057659	7.46582597512539	5.04840064874079	7.22924063230544	7.48491477462307	8.66273948247882	7.55243633598366	7.12194902370319	7.21219521992511	6.64013096608985	7.04930459361218	7.31625102320386	7.12857127708257	5.15040542878136	7.68077856411945	7.96104466204309	8.72411928357404	9.29262443795284	8.45820257946066	8.31667668797844
666657	Caspase 3, apoptosis-related cysteine peptidase	CASP3		836	7.73875950090838	7.47514524767465	5.92709569585683	6.05734058655769	6.99706366381856	6.18761955639591	5.64808448008682	2.60381411644266	6.98496495222614	3.40228351915787	7.15018077593264	6.60681818552829	3.29837758481443	5.90092411425642	7.04930459361218	7.38463089879462	4.17871212019553	7.32424493213262	2.49418468422714	6.99544346107929	3.60506967923104	7.23352684718621	6.52547794116484	7.09941031923071	7.10134217910811	7.70314180035293	7.62210390450704	8.56770186827696	8.05795146364964	7.32481644126783
52182	glycoprotein M6B	GPM6B		2824	8.32960852718205	7.66286191004755	7.8711066161277	8.21104470251868	7.8885796187918	6.18671981391554	7.77733195096507	1.42161959543616	7.06745988983523	7.3964817650917	7.91592101588762	7.77011263593757	9.01574572583718	7.27664359958105	1.01324739718931	7.59585001768827	8.4186707171074	7.7827877975276	7.63119248502236	2.48295649502243	7.64267375688911	7.9941005894692	7.92740733163507	7.35549606960654	4.77813245514918	9.29620539576344	7.95789802696727	8.52174963348544	8.20985321480325	7.81798798520162
179887	Exocyst complex component 3	EXOC3	SEC6L1	11336	8.0423670621349	5.84338123877376	7.28976318233069	7.83500490857918	7.34364036526283	7.15592509606147	6.39399236563406	6.83789894318116	6.98496495222614	6.97695477682525	7.49376480145764	7.85202245084453	-1.36340841655092	7.93363262817323	4.92903362851096	7.48712783545946	7.53292372543211	2.46158979194623	7.75608508957757	7.4528074977912	6.68324738529501	6.66876969260804	6.58783423527885	6.86910573388705	7.1701287696282	8.16575649205827	7.46821054417537	8.68402137028682	8.12814429301649	7.83500490857918
375479	L(3)mbt-like 2 (Drosophila)	L3MBTL2		83746	5.45821294815521	6.1509754207829	4.62369631247655	6.66353986465726	5.74096085352736	5.31851420806832	6.19705397513668	5.38595793838822	4.97299450458789	5.31016694833909	4.89078375460014	6.42192606442563	5.21207305805203	5.05169664736614	5.50494466669077	6.82934701150711	3.67818782111644	3.75844588382909	5.67729346624128	5.07485245375015	5.19815421952998	5.35575531224596	4.48210589358988	5.30073599610069	5.95369144079486	6.83835373842334	6.11520271313137	6.9040013632334	6.93700424982433	5.8977028371944
1492440	Interleukin 13 receptor, alpha 1	IL13RA1		3597	6.07200163458971	6.9134668215052	6.76368134352	7.57470345417652	6.86413480646418	5.09255075929272	5.81553874720817	6.47509219613186	6.122321484485	6.50170292174412	5.49508336645697	6.18345573413088	6.24404767883378	6.18233651745855	6.55599060177244	7.26208726098469	6.58095524044549	6.29141057714656	6.06262855795586	6.76066816045218	4.82294388741429	4.23437058793634	6.28660644960566	5.80108005153110	6.22109745239458	7.18619285005412	8.57288097621816	6.83942736019406	8.07949811736077	6.8090631159389
377152	NADH dehydrogenase (ubiquinone) Fe-S protein 4, 18kDa (NADH-coenzyme Q reductase)	NDUFS4		4724	7.58483415003427	3.04766096929836	6.91695730145295	7.79163008004639	3.93929651673041	7.66323189653	6.19705397513668	7.64974266421279	6.51212259869592	7.38039215296185	7.97840667946862	7.56423983200477	7.69572264556915	6.84780180979061	7.22602327337264	8.17502949825934	6.91195054783987	7.50434236029436	5.90475307664032	6.83043698228184	6.78903130196579	7.58044022143828	6.62362894825171	7.00973243331165	6.55926163254519	7.98565020967703	8.55835235039	7.47654117481282	8.39976194420159	7.95570894045932
550051	Protein kinase N2	PKN2		5586	2.64815594675075	6.02647529176707	5.45901002736841	5.34130064842969	5.86905066478583	5.95152597405589	4.8409722799188	5.20902420738052	4.48210589358988	4.06281467789434	2.67324868568925	4.67607177958554	5.01023489325206	4.52400851102311	4.90552981830288	6.67823875433818	3.93216802152236	4.89767469463599	4.94057528173993	5.13474310774212	4.86379420381107	5.08574337974852	4.92081639732499	4.78827436139415	4.81397475503436	6.31803619083638	6.37054409017927	6.67671577643936	6.59115220734415	5.40480473574306
130941	neurotrophin 4	NTF4	NTF5	4909	8.1982240159203	7.35329983810941	8.56352580687661	7.80099604328796	7.43828890309822	6.76258998090237	3.79024908885574	4.45574546787406	6.71716762274933	6.7934529874918	7.20953433911949	7.51161411887292	7.25078584599283	4.49337412445252	4.36810359223119	6.87554373175579	7.76165255858325	7.7433978136695	7.84047458779372	7.71530452653283	7.69705223285086	5.22459705010898	7.53918255882758	7.49895400077086	8.00682049613589	8.9162354053624	9.18568929241868	8.69184051188475	8.99206881641833	8.78590418700477
68203	5', 3'-nucleotidase, cytosolic	NT5C		30833	8.96400959176175	9.19859355796048	9.21999164426189	8.95464565588691	7.53097347007454	8.45366087857264	8.95986469725207	2.62995784829843	6.87854158313417	7.7228704201077	2.81781994875249	8.48811268166853	8.85937351087222	8.91166435077678	8.54824481317199	8.89486448449733	7.34081280279494	3.80478454517893	9.45073455896409	7.19459791049813	8.31503590429777	1.86611607535252	8.66553168023767	8.54101849431919	9.9849552209742	9.53588962582157	8.83886482539462	9.60700164878747	9.9985734708339	10.0568886023740
282857	Elongation of very long chain fatty acids (FEN1/Elo2, SUR4/Elo3, yeast)-like 1	ELOVL1		64834	8.54264830019946	8.6863392300207	9.6221412652477	6.88211927704308	8.52394544351655	7.9952430303688	7.78170675283074	4.47107733276226	7.17256201423098	7.88457995411155	7.70745340146754	5.40366992461616	4.53525076460151	7.79649998743641	8.3627239286119	6.29226192339545	5.84182307713203	7.87332455546809	6.58394037240947	8.28646069140578	8.46986939768983	8.43026479191647	8.27551980212076	2.56393428674183	8.53336308741947	9.8949248829099	8.76555737300681	8.4565196406636	8.77686525770598	8.39576032474202
469989	Ubiquitin-like modifier activating enzyme 1	UBA1	UBE1	7317	9.88981108451062	9.91321574490673	10.0393630093124	9.76496731855195	9.3784904710077	8.11084255742723	7.85202245084453	8.07236881133059	7.94054127286052	5.79256627448253	9.19716668184326	8.8336372194846	9.15151999012322	8.00180527061695	8.0298133202131	10.3590273310740	8.68402137028682	8.48510713416071	8.87841673632126	8.50390912181995	8.23817455674157	8.02130717584334	8.04115746687102	7.57125965427506	9.07998924668203	10.5039489098008	10.9195496337899	9.63279105811965	10.5000014458980	10.2011071692698
284543	Spastic ataxia of Charlevoix-Saguenay (sacsin)	SACS		26278	10.3559337453371	10.2870296497871	9.94252798948066	10.6650672725088	9.84223627623817	7.85380570189549	8.08337473803872	8.8851923620424	3.60204433936253	8.34245533326441	9.4102126834037	8.59996861540186	8.21766035450107	8.73676295062018	9.03213954100662	10.785414081313	8.69482674505133	9.22157213230646	10.0061766436313	9.18568929241868	9.9713583930073	9.15027683617962	8.79617805621078	10.1898085033516	9.6795017784635	10.9308065930136	10.0688336505004	10.4695754180877	10.6121884222069	10.9582141755549
742121	RUN and SH3 domain containing 1	RUSC1		23623	6.69540120803981	6.42339626321888	6.406741191109	5.35860001641893	8.20985321480325	5.78035246378205	5.54875607611715	6.06262855795586	6.57193261219794	4.83876511532395	6.07706075997526	6.38499353569605	5.76236984299014	4.9119477043957	4.21954964262326	7.55713453670874	6.46442606683245	6.23976777100949	4.72690793868327	6.47069683888132	6.42777827005767	2.75140846506035	4.24715177223622	4.4092904918472	2.9036454502366	8.4270993576687	6.64567986326675	6.92853702126641	6.60977960927246	7.40386633331762
166621	Glucose-6-phosphate dehydrogenase	G6PD		2539	12.3543599345616	12.4124497276149	12.8554924572340	12.2877324527308	12.1173939632245	9.5880578707285	9.2035563392711	10.0853241256355	10.1350112262065	9.24729279504683	11.3616414994791	11.3008470470116	11.7788307829664	12.1926131333135	10.9994662148032	11.9754615653042	11.4221132050655	11.256528573378	11.5243885882419	10.6563862371259	10.9797335506404	11.2456781389742	11.0613672376406	9.42411742660798	11.9966962961862	12.9407804642671	12.4414256836874	12.7028233402678	12.5432119672612	12.1868742535169
260743	Protein-O-mannosyltransferase 1	POMT1		10585	6.20146946932863	6.24576644864853	6.17598372997431	4.50143410597718	5.11164744277874	3.96707665258488	6.58181244247003	4.06281467789434	5.56469218071249	4.06281467789434	3.81280689096668	5.17651404088781	3.06886499419577	5.57836122533483	3.24492077015842	3.97992258750926	5.78611161062152	5.01469145021264	6.39113629810778	5.32164272350064	5.24759888083541	4.59270681658262	4.77046526602816	4.39869823922654	5.6787374036971	6.073980518113	6.18845582613765	6.66353986465726	6.60977960927246	6.65233655432663
255398	Transforming, acidic coiled-coil containing protein 3	TACC3		10460	9.18899574097801	8.3003109960241	8.39617804113817	8.24224966528024	7.74552191577984	6.76258998090237	5.39924303636898	6.72560155159136	7.22924063230544	6.24117614037888	6.62274250321511	5.54432866886262	7.71241522593401	6.61760392952119	7.01877796968152	8.3069793640489	8.52610957218947	7.70794509973461	8.05103754195702	6.76066816045218	6.75879861011257	7.10716442454825	7.16941704082628	4.9123610823557	6.81982741721133	8.265382710691	7.96140218412208	9.64438474108957	8.04341060405542	8.42489319493331
725472	Tubulin, gamma complex associated protein 6	TUBGCP6		85378	6.99737906216296	6.30007215909589	6.00254488770584	5.9255168826494	6.42087671714811	5.58189560877353	5.09653168931855	6.01781340305934	4.93087279904002	6.01555496575948	5.92205705215474	4.13162907498622	6.10778154622151	4.28279050279447	5.13292916754433	5.78733971674109	5.67823797419299	6.23976777100949	5.90475307664032	6.29270160342408	6.00470049646692	5.55061115349939	5.75662092408969	5.11109273912343	6.00470049646692	6.94507966244302	6.2631503218376	7.64373451431843	7.20240020719531	7.30202055227743
120828	ATP-binding cassette, sub-family C (CFTR/MRP), member 2	ABCC2		1244	8.344642009606	9.38551622804415	6.70227155526822	6.87976721455464	7.12374301379098	5.92243743394261	6.39042605682377	6.94316521936712	6.63066180594778	6.64033795938585	9.06200713406582	7.46367439292528	6.9297696061843	4.77749920363699	5.82430482617631	7.49129980496417	7.04506754496618	6.98203504466903	7.59111858590145	7.09300763583755	5.84338123877376	5.13692169549044	6.99573602829448	6.37363678655107	8.05877370439713	8.02484275295027	8.42062531978773	8.94088274230239	8.31899528361483	8.60695718297187
41473	Phosphofructokinase, liver	PFKL		5211	6.10881820626816	6.43345497379808	5.09027995087749	6.53457623185608	6.29683636302127	5.44363890957937	6.63774628563627	5.07833865214105	5.50852342948565	5.42856000675568	6.67569669835023	6.33323745602284	6.12861891133587	6.10434760898765	5.55109980679745	6.11596419405479	5.89397405184437	6.06024264576871	6.7752831326467	6.1589268011787	5.3773187250268	5.35575531224596	6.22082983113171	5.35639624996178	3.26647463060662	7.28188338118861	7.07857342326014	7.52301920571491	6.89464175098913	7.1971358031037
30319	Plexin B2	PLXNB2		23654	8.17547069359527	8.30593961328575	8.57855320207546	9.19546057468356	9.5011067104194	6.94019705044857	5.54875607611715	4.22317017941075	6.98496495222614	5.81419831529878	7.21912160085668	7.83500490857918	7.17146598240128	7.49465573947327	7.12051826064232	8.59777070823396	7.20953433911949	7.01926857899548	7.26368350837353	7.412580766426	7.67362071421899	3.84969211679349	6.76853381472955	6.46509466795303	7.63298105210263	9.56514340826604	8.67028149410753	8.446318794603	8.87431144098874	8.67198005399803
435076	Centromere protein F, 350/400ka (mitosin)	CENPF		1063	2.69866862586461	8.781876092229	8.5280107232968	8.22760452012304	2.89120227897099	1.76550453324092	5.64846726339723	8.5507197574255	8.92652148330453	8.87146483447787	8.70377218643661	8.50159969687108	8.60103354067607	9.05772380722813	8.324271497442	6.22221254202093	8.95308802846054	6.4647424439808	8.56853371387814	8.5442129938936	8.67028149410753	1.9540387187161	5.85743775690891	8.637876489977	6.43994618348588	8.55940481903535	8.36843324603306	8.7530942481084	8.5196238127606	8.54212861389324
489006	interferon induced transmembrane protein 1 (9-27)	IFITM1		8519	7.89258169844622	8.24476281812927	8.53254573055137	8.47032461182583	6.90298772381391	8.66273948247882	7.59172471705542	8.33567104145552	8.01897632353744	8.75056961750617	10.3783296626417	10.1984229083668	10.3812256891409	10.7704971461794	9.96038253136115	7.82374966257854	8.66553168023767	7.64154028448713	8.07799284409192	8.6539167136559	8.86055312349629	7.5707092226411	8.37522107693319	7.79982307625024	9.1978802963057	2.67324868568925	7.68456091273624	6.77040546352465	6.99050218846822	6.02534915652698
344938	Vesicle-associated membrane protein 5 (myobrevin)	VAMP5		10791	8.80954265978924	9.4834557496255	9.32266550955918	9.07019858758055	9.32266550955918	8.07075317946396	9.13553546233193	5.35094141884485	7.46582597512539	8.41768784078922	7.26781518804851	8.70515651368272	8.73433945720435	9.04340999836914	8.65494671466136	9.13830718532896	9.30645299374792	8.47465738222726	7.83585203729424	9.19716668184326	8.22604286668601	7.69181031621823	7.49491557056388	7.33563362677518	8.63960851637014	9.95927784394742	10.2257628790835	9.61128358983222	9.7189146604255	10.2474979517184
591527	Keratin 8	KRT8		3856	12.5966576006729	12.4414256836874	12.3421677279782	12.1678444822880	11.7052342599228	9.82769339028815	8.68402137028682	5.88691203822432	9.55894724561077	9.6037629914835	10.5000014458980	10.9482020494472	11.1260642560686	11.4298224135811	10.5173905229091	12.1868742535169	11.0271994024414	10.3906368218553	11.5023019812666	10.8059242870198	10.5139158594120	10.756491665283	10.4211634907906	9.9084918965885	11.2941682931699	12.895750021644	12.7468355065478	12.4535333588357	12.6355678849822	12.7337368113302
739608	aspartate beta-hydroxylase	ASPH		444	13.2433583211553	13.3242691171337	13.1333375150523	13.1333375150523	12.968872692609	11.0323377585016	9.21109657486473	9.9639545031181	10.6011967047735	10.9582141755549	12.0249930973987	12.2997326883007	12.1678444822880	12.5966576006729	12.1063149591587	12.9840646553883	12.255873952431	11.7342663207514	12.9109146131684	11.0613672376406	11.8660739664477	11.6315719536551	10.9238871372740	11.1028936256170	12.8686342571980	13.8668932160143	13.6025638959753	13.4839045253252	13.6400259151433	13.5684935163306
163023	Nuclear pore complex interacting protein-like 3	NPIPL3	LAT1-3TM	23117	11.1260642560686	10.6379573997221	10.0912709764000	10.3248718506961	9.20813349336188	9.22787899678537	8.63562184294462	8.65631273001752	9.72749731070517	8.27920965837632	9.77667119786733	10.2900335926262	9.9580027988096	10.1825731311837	10.3684926302841	9.15027683617962	9.3669673951441	7.82433534340189	10.0829735737869	8.6037746424567	10.8993793438495	7.41405107857214	9.0838323627687	8.77884415422205	10.7130427365867	11.2941682931699	10.2612199103723	10.5971861112639	11.0122325489633	11.1866862501962
786084	Chromobox homolog 1 (HP1 beta homolog Drosophila )	CBX1		10951	7.09825550810226	8.22851549103654	7.63422666388401	7.71119003645578	6.87246351300797	5.51457873701074	5.59311923624277	6.58026310018095	4.41888912283009	4.3856167030948	6.62274250321511	6.39625575665541	6.31337760886205	6.42539399624677	5.4677087213235	7.24380773927248	6.46442606683245	6.7080955390522	6.25064232553426	6.73859234542431	6.03293500398339	7.03989425111461	6.25415495914035	5.41567866554609	7.12525753236249	7.49129980496417	8.87146483447787	6.72618339219002	8.5467966235382	7.42107945512653
140272	Insulin-like growth factor binding protein 4	IGFBP4		3487	12.1758842108379	12.0954361134941	12.0420491229654	12.4750028276158	11.6787768756445	9.41634148258421	8.24968238559716	9.24597757466098	9.41788831583116	9.06037698537147	10.6205207568315	10.8139390375909	10.1376515075279	9.56514340826604	10.2660858809048	12.2786320731802	10.8728136310333	10.3328707090157	11.3691805966426	10.8568412140326	10.1025557797656	9.106771488578	10.4537633550107	8.84245930433151	11.2881762204594	12.7028233402678	12.4928118606401	11.9000372730583	12.3327152176614	11.9868147613882
612956	Cleavage stimulation factor, 3' pre-RNA, subunit 3, 77kDa	CSTF3		1479	5.07452494687544	6.66427241819114	4.8405723871952	2.52439342970194	6.51092030613238	5.41149757975406	2.96423922606215	7.49202441887487	6.84897447008799	7.29742550669058	1.82723053504043	2.53042362350501	6.59080565580885	1.97613447283165	6.51092030613238	5.166585795476	3.38127460953929	3.6561360826525	6.32356788582471	7.10243804490712	7.02501021551719	7.3369949457937	6.91861098129754	2.66299504853237	6.57263067826943	6.84384355012806	6.27568899795439	6.43696687079295	7.47050816317165	6.76907139071463
398844	Stonin 1	STON1	ALF	11037	4.13909797003917	4.98126017368571	6.29700330423048	5.92393709175225	6.34888863770564	7.10651788528502	6.88638248159128	6.10434760898765	5.4309645235956	5.27674046768137	7.41704672108807	5.93301790518472	6.6416061602481	7.11821533850395	5.95620041996196	7.49263054205367	6.96727303041196	5.23668031201978	5.65942308900522	6.03150858222363	2.51798924844254	6.08475793951199	6.6268791565457	5.30073599610069	5.19162149215867	7.78000899320357	7.03580432580407	7.35924692135234	6.90907239090284	7.18387702211567
70555	Calpain 1, (mu/I) large subunit	CAPN1		823	8.35159805579854	8.05300310397204	8.67809965892694	7.92586894324884	8.01774559433878	6.50561686374133	6.38175635668657	6.47509219613186	6.63066180594778	6.22109745239458	7.86259971996728	6.41838338910066	5.03916547001158	7.5022474854451	7.51624846601236	8.45701962105905	7.08406544250153	7.80149333002408	7.61634457450184	6.97632882852277	7.03550341680791	7.48712783545946	6.82407617824079	6.15575621255445	6.13400220341879	10.1287346819119	8.70117216447452	9.2823899863969	9.36013062769877	8.40786623038366
306697	THAP domain containing 11	THAP11		57215	6.74478701119464	5.94955081610898	7.45209524162287	6.69774031729262	5.71804616957851	5.27809946834073	7.16369123053701	5.16262237348113	3.63730813508878	5.21726753422373	4.60059515106562	5.65344896588404	5.64148246566821	5.94922702504474	5.77713418803086	6.30121503900074	6.34338744049922	4.97971496973464	6.5037032317511	5.99803795762582	5.46259105587743	5.57998992106721	5.25865965136243	5.32626819254916	5.89598666909264	6.63295241659642	7.18246570216513	7.2719995579636	6.8758603621927	6.7790951139054
269565	Multiple endocrine neoplasia I	MEN1		4221	7.62516241218102	8.02412515856116	8.89413618367214	7.93363262817323	7.45958078379266	6.1621602470254	6.30292807869665	5.67823797419299	6.41121973260372	4.33229267479687	6.98577926145097	6.50855376682468	6.6920778046392	5.93100937024963	6.36229245736942	7.52554955219619	6.213519554113	6.88856504891268	6.04513754935924	6.86223224211729	6.62801794150608	6.56620858199055	6.37800559913979	6.29815481741598	7.15018077593264	7.9967220552671	7.6412110177816	9.01152813942621	8.22851549103654	7.69404733430938
364840	5'-3' exoribonuclease 2	XRN2		22803	8.28041956261729	7.58921887111647	7.56577646818803	7.62790565566571	7.19158729319575	6.47236540289813	6.43482653575311	6.70965119636038	6.75088821660552	6.41838338910066	6.88151013082828	5.25211147970804	7.49166215741296	6.78260311810538	6.31337760886205	7.89601024455325	7.40227299362063	8.11251473024877	7.81139227447972	5.04638772234297	6.26341778476771	5.39334918074487	6.61071603902114	5.98521433821189	6.69667563534289	7.82404253271081	8.01113456015613	7.67473660159873	8.18672236011375	8.35820118822592
454265	SID1 transmembrane family, member 1	SIDT1		54847	11.0058049980301	10.6080378242093	11.2734599154709	10.9195496337899	10.5819731335020	9.4301863184708	8.36025589694376	9.38018097776041	10.4211634907906	9.4461202682637	9.60270621235637	9.96853051688767	9.46714723551488	9.72845753664104	9.42179974704638	10.5744366530413	10.4137923350571	10.3712896568857	10.6720242252069	9.48430593426943	9.76182283844716	9.45291621136477	9.41905020442144	9.75068836510336	10.7224661156674	11.2156117057549	10.7307034816599	11.4421186408925	11.0861557027825	10.9797335506404
270505	Matrix metallopeptidase 14 (membrane-inserted)	MMP14		4323	9.34196852874826	9.6968894226019	9.5947282803366	9.48671819117683	8.81021583340133	4.43341271463605	6.49847420070896	6.83789894318116	7.68004950424241	5.33414596933882	8.3721067001675	7.10243804490712	8.13180975868567	8.86481640716828	8.03250882968724	9.36322521920623	8.61123411161948	8.15814523555953	6.4760070779623	2.55772300543231	7.83767140446964	7.25908040775578	8.28041956261729	7.40227299362063	8.87640916781878	9.39647618474916	9.18710604040755	9.60934090332205	9.57345192016781	10.3590273310740
530986	tubulin, alpha 1c	TUBA1C	TUBA6	84790	12.255873952431	12.1394055822347	11.8428664160588	11.5243885882419	11.6893992103524	10.9582141755549	9.33147893895597	10.1646730406592	10.2968234741752	10.6290047295906	9.80980993604466	10.3004521531955	10.3590273310740	10.6650672725088	10.9238871372740	11.9169977799065	11.4485367137447	10.9901502240608	11.5463846927751	11.3424618473792	10.8180113245082	11.1999776272942	10.8953188881271	10.5420011874375	10.4769684741478	12.6355678849822	11.9169977799065	11.8760984255607	12.1678444822880	11.9566388960358
399182	Vacuolar protein sorting 29 homolog (S. cerevisiae)	VPS29		51699	11.3424618473792	11.0757430743842	11.1385134430610	11.2107721976313	10.9994662148032	7.77233806682112	8.20105502376641	9.35480969669037	8.9626945126888	8.31153205762023	10.7956954098939	10.2573174376776	10.3466937029082	10.0829735737869	10.0853241256355	10.4106069127973	10.1179347434768	9.60051318076909	10.3435613354294	9.54450916412772	9.757109257786	8.84787145661666	9.34385537617487	9.2999688324916	10.204495076527	11.5905139284134	10.3749468594446	11.3965086524715	11.4298224135811	10.9994662148032
195800	cyclin-dependent kinase 4	CDK4		1019	8.86055312349629	8.90814452607438	7.89601024455325	9.07928502978327	8.4002239098454	7.94676441116558	8.06103001168167	8.10929137112038	8.4017655007808	7.71069267331399	7.44083356291362	8.4323633000256	8.08431450721025	8.53616872400687	8.22479417606548	8.88058188366125	5.72537704460224	9.07928502978327	8.83556090539252	8.28646069140578	7.78822436734668	6.6885930399229	8.40525916449467	8.13264823770011	8.18551209615589	9.42411742660798	10.1931838342465	8.7847743399162	9.54042221291329	8.81772653260972
666703	2',5'-oligoadenylate synthetase 1, 40/46kDa	OAS1		4938	8.5280107232968	8.79344098731058	8.324271497442	8.57078111481261	8.54824481317199	7.36649998073171	5.07948478382681	7.22415244966366	7.71862868045423	8.89840373523441	9.132645411248	9.27373522874138	9.40090946453882	9.7997987333372	9.49048851878694	8.31625453243523	7.92740733163507	7.75722898177648	7.32810569077815	7.69871895102653	7.79092573150257	8.00219760782172	8.2239480592253	7.70745340146754	8.12111100415284	7.31210690032362	4.92543096682266	5.85886155117829	6.41675608023762	6.15762643464868
469880	Sepiapterin reductase (7,8-dihydrobiopterin:NADP+ oxidoreductase)	SPR		6697	7.8484960716515	7.98519564476718	7.70543630398379	7.25743871866835	8.05618212296389	6.43616581998319	4.28402899173018	5.97021403816129	6.63066180594778	6.44726426467947	4.72511814138191	7.44345751393554	7.59249594986296	7.32424493213262	7.36564207254026	7.67289445937463	7.72620241989256	6.40172177998778	7.65231607314967	6.91981111408204	7.44381323510155	6.85283170384962	6.3608384739511	5.18876879384105	7.7542693904528	8.24902947450308	8.26651773721652	7.83662387446502	8.22851549103654	7.7304012366691
140525	protein phosphatase 1, regulatory (inhibitor) subunit 14D	PPP1R14D		54866	4.79439530093039	3.96910413917533	4.45996329655326	4.30885741542767	10.0544513004433	10.7803619872404	5.59311923624277	4.91437566996766	4.6884439836142	6.47452127144163	11.9084380255501	4.72273188792155	4.46984786134104	4.15096835348983	10.7040754157498	10.9436923321949	4.44867516745788	4.32631570093714	4.36810359223119	4.06482801882573	4.35403284494817	10.6046781808826	4.99423383395054	4.78827436139415	3.48424420661965	9.72749731070517	11.6555606281538	9.27071484699811	4.6996932429317	10.7903621854251
131015	Apolipoprotein B mRNA editing enzyme, catalytic polypeptide-like 3C	APOBEC3C		27350	8.4473159951267	8.27292531209479	8.76732058905839	7.63807693125991	8.18551209615589	8.37986129594925	8.33882293039878	8.44216472523044	3.35672663965036	8.30786965880256	3.02242821671695	8.45298016532081	8.1407450094844	8.23343522521436	7.56393163268978	8.21819927297526	8.6482667244628	8.06763879345243	7.53883624522784	8.35648944088636	7.78558841766665	7.1261338778728	2.53700700836591	2.66299504853237	5.9098292983744	8.73433945720435	8.48159360275022	8.91107965883338	9.1688289566211	9.69394173246722
286378	Zinc finger protein 135	ZNF135		7694	7.39762616821585	7.12194902370319	7.38557301914997	2.62427491337821	7.24235829301177	5.98093041120395	6.54987262481931	7.56099519227884	6.52640464526002	7.73102251222217	4.95759506704267	3.27973222439538	7.43771382307743	7.0772790678523	3.70871285283908	7.63595156990113	7.62132214140044	7.37017324922883	7.83172364064458	7.54033958711007	7.0552726522738	0.60364324541809	2.57045524499440	7.49895400077086	6.83443684590302	8.4313674604165	7.78929647790155	8.0480659597201	7.64462445712274	7.48642823786247
526788	Tumor necrosis factor receptor superfamily, member 10a	TNFRSF10A		8797	7.06642219434335	7.8513912434266	7.20071492641206	4.41944288501164	7.3506048062577	7.68495887839534	7.220162550988	7.39762616821585	7.4046538563754	6.98461350428791	8.045480953805	6.62465492789856	8.47465738222726	7.09825550810226	7.25446311528613	6.20092187837988	8.07949811736077	6.47509219613186	7.26737645044568	7.71241522593401	4.69431380214827	4.10387207288934	7.14478907127801	6.5292711547339	8.31153205762023	image:526788	8.62557389471984	8.76732058905839	8.23771120766128	7.86816487658153
1690296	Mitogen-activated protein kinase 8	MAPK8		5599	6.95550902790785	6.98537216429175	6.56910901753821	6.17082228512888	6.09940923721013	5.64787757096176	5.76026201002758	4.07687917433434	5.61913901799547	6.27461169872366	6.57055131744697	6.74478701119464	5.92729770878806	5.12956018082243	6.64789100160752	6.29184825867187	5.89397405184437	5.94103831741823	6.13072328076922	1.62574028103719	5.95740515094784	6.18888050686787	5.53308276803183	4.68817283206023	6.06607147351965	7.31057384864319	7.44937977523438	6.81359490717291	7.1739291451861	6.35312532425046
116454	AFG3 ATPase family gene 3-like 1 (S. cerevisiae)	AFG3L1		172	12.9840646553883	13.0616385445795	13.1493101957274	13.2882108803749	12.8686342571980	10.1955405561313	8.88002252033165	9.88460171839643	10.4467645346467	10.0688336505004	11.041645052259	11.1204863172923	11.0969059074638	10.9195496337899	11.0861557027825	12.7164541164829	11.5023019812666	11.1518532275553	12.2208717219564	11.1543559305340	10.8139390375909	10.5652689878641	10.1350112262065	9.9713583930073	12.5290498275591	12.7468355065478	12.9407804642671	13.2703292992372	12.9109146131684	12.895750021644
505090	Mitochondrial ribosomal protein L27	MRPL27		51264	8.43026479191647	8.25160262894955	8.46525896019751	7.8412793931672	8.37522107693319	7.56837590111498	3.92979998487690	6.27427493297111	7.30961136948024	7.3964817650917	7.7426214708127	8.08040695443828	7.517576829652	8.46603947221745	6.28208726195188	8.3008329973076	8.0840004039618	7.50434236029436	6.69695762513628	7.6683104537604	7.05164889933991	6.54112701077906	7.42162239149444	6.94059154253285	6.31033609358606	8.65911500305318	8.01897632353744	8.61123411161948	9.4102126834037	8.13726596816781
142858	Tubulin, beta 2A	TUBB2A		7280	11.0665131076541	10.589914315935	10.6046781808826	10.6080378242093	10.6011967047735	7.21809983057096	6.93513632263504	6.94647186299031	9.01996239630508	7.65526735550428	8.93171867776874	10.1500010174129	9.15804306467663	8.71356092571447	10.3136364054357	10.3035527897409	9.73155436958553	9.57555191706254	10.1955405561313	8.82483524174122	9.1653086080776	9.4342698135464	9.2265216194097	8.70808072644302	9.64184288804628	10.8642699724891	10.5331057455649	10.6609573407043	10.3366942429369	10.0282090571206
344493	Acyl-CoA synthetase short-chain family member 2	ACSS2	ACAS2	55902	6.68052577458044	7.87059380512834	7.65067345543705	7.9373010871362	6.22408168258465	6.8298110319831	6.39722105850832	6.91138719952238	7.27882758714612	6.93786711615069	7.36885812028425	7.24709010740157	7.44646632794624	8.24568665619558	7.4292425863988	8.55188320572433	7.47154435249321	7.11317524159458	7.69871895102653	7.46614004441753	6.72708647313469	6.93987180376787	5.40641223756703	6.98741909547785	3.97479575337874	8.54732654511084	8.33264803157386	8.6539167136559	7.7557779207323	8.00682049613589
397767	Family with sequence similarity 19 (chemokine (C-C motif)-like), member A2	FAM19A2		338811	5.43521502453747	5.05833328038523	5.02345609637793	6.44567835970942	5.50021158445538	4.51108856603536	6.44977082871516	4.39298646528239	3.94314537015696	4.43184190893725	6.16270203549708	3.52986640307863	4.46984786134104	4.74319401183201	5.17923197908322	7.16787097143010	4.67188812541683	3.37657877533661	4.06991707560744	5.92023977381596	4.65396520995061	4.70997067419172	4.31402531124216	4.86946695069469	5.09052283658605	7.22674309574438	7.27329987436172	6.2868144882138	5.87738315831069	5.1679976482399
115249	A kinase (PRKA) anchor protein 1	AKAP1		8165	7.25408198482477	7.67289445937463	6.37986064493341	6.70994235474001	6.34527806710715	5.51457873701074	6.45037212207406	4.72362854553192	4.02406938599733	5.11560342137645	6.67569669835023	6.71940701780068	4.79682985391023	7.48339768098067	6.46208080104533	7.16605937195105	6.20253613180421	4.5621457968448	5.8354713106812	6.56122219576706	6.88279548226716	5.57998992106721	4.24715177223622	4.86946695069469	6.45037212207406	7.10716442454825	6.94806004487236	8.13413310794098	7.32358954710786	6.9040013632334
342570	Collagen, type VII, alpha 1	COL7A1		1294	9.6198491000676	9.40747752454868	9.5179630709518	9.66284083851716	8.85996343774732	9.19859355796048	8.00141282668807	9.05208683146785	9.49389244839533	8.59258548032826	8.009069930946	7.77493717617188	8.15037819269219	9.08069312000194	8.00682049613589	9.63279105811965	8.84919389752238	8.33786010638181	9.36887990622015	8.49494008946938	8.72721926871988	7.69705223285086	7.16236933774435	7.79649998743641	9.45515376025427	9.80980993604466	10.1536628929131	10.2918108167982	10.1376515075279	9.66800779570372
428069	YEATS domain containing 4	YEATS4		8089	6.69023783319006	6.78334361093638	7.00938307005231	7.22078453411325	6.8830779628558	6.00470049646692	7.94531144959678	6.21666851133942	6.44567835970942	5.53508216097954	4.4298135061301	6.2637740278126	4.53138146051631	3.52339322153605	6.27623618182767	6.48817878143375	6.86160693455373	5.49790235325214	8.37777969702362	6.77016957493311	6.52839575043531	5.82902520033416	4.16267813735416	5.77083824387808	7.46456429651073	7.5968148687673	6.90326332270181	7.56099519227884	7.53482712594305	7.3917845479275
489551	Stromal interaction molecule 1	STIM1		6786	6.68834637492554	7.57358183419013	7.81545811015473	7.64024865497559	6.6915384715627	6.11039806828698	6.99305867371655	6.36167890933601	6.32368901382452	6.35692696771057	5.30415634091634	6.7331410683802	6.74394494257842	7.64711568931731	6.42087671714811	6.59895212200101	7.52521698923552	6.49366825831336	6.8924088957787	6.83043698228184	6.2086202315523	4.39930199412923	6.34967609234058	5.66962514420085	1.96512889660361	8.7236763741199	7.27420577125487	7.99967654509984	7.9318083099793	8.35925088365509
42958	ubiquitin specific peptidase 11	USP11		8237	7.33340589966717	7.04529344817168	5.65839793257318	7.67009214670529	7.28089011387228	4.29313692862661	5.43264100314866	7.30582243211087	7.53017202413097	6.00219582714036	7.8588202502409	7.20813000049383	8.27292531209479	4.2567252468193	6.10792552536778	5.90693149421574	6.9416339878263	6.39042605682377	7.46367439292528	7.01345925619118	7.97093956864558	4.8606941221539	6.71593006946808	6.4147514924319	7.98230204392495	10.0654312392772	7.72510692119199	9.11000803644188	7.81545811015473	7.10891263667088
756029	Coiled-coil domain containing 80	CCDC80	URB	151887	8.43426347008119	6.83320756115138	7.9254483851442	7.62668570064082	7.6601150755937	6.81773051017522	7.17967009039929	7.30582243211087	7.62871119666061	7.36444880138007	6.76041298753401	7.36994487525402	5.4417898547588	6.51446887613318	7.8666343434988	7.99136379430453	7.96219701403912	4.93486655968689	1.76550453324092	7.44646632794624	6.32398822764291	7.85640097720754	7.51305851213178	9.0230833969118	8.38433922068692	8.1790524914074	8.23063596136243	8.25382691956769	8.30361964671236	8.43528407093233
178956	Adaptor-related protein complex 2, beta 1 subunit	AP2B1		163	6.86794786393477	7.11880442998625	2.94330712398906	7.49263054205367	7.56995637600305	6.86481616234548	5.67234611510569	6.69178922855896	1.39454843916715	6.14053514725225	7.11031699330287	6.48549179223163	5.64342240295577	6.9513577609679	4.93228129351125	5.98241095098766	6.84608879995207	7.56029147208846	7.53482712594305	6.94863152525355	6.68324738529501	5.21943078252788	6.30292807869665	6.84422406073804	6.83443684590302	8.2873700732414	8.62226649162554	6.5707370794066	7.66286191004755	7.12857127708257
177025	Exportin 6	XPO6		23214	2.89120227897099	3.23293635981877	7.4174797518248	2.66299504853237	3.04766096929836	7.71168722819278	7.12022425874317	7.32391727683614	7.45751673336446	7.71707031092499	7.68186498798964	7.9643197539575	8.0746874183751	7.95960781818473	5.37244577284044	6.62654353732668	4.56114629016235	7.43121660582328	2.50759394533284	7.30430785046086	8.16697065835697	7.82404253271081	7.53918255882758	7.42068800669519	6.75348462285526	7.91140028440176	8.01340377652365	7.55008488091715	8.38978585659296	7.29742550669058
592276	Keratin 7	KRT7		3855	13.3048198063707	13.1029037891685	13.2433583211553	12.9840646553883	13.2433583211553	11.4298224135811	9.74825085935216	10.5694094541220	10.9353254187048	11.4096899384934	11.291175367738	11.3616414994791	11.0271994024414	11.1786021381586	11.2340554702474	13.2072385958697	12.2997326883007	11.9363916726572	12.5172325328528	11.9566388960358	11.6636961635931	11.6555606281538	11.5525980525361	11.256528573378	12.5432119672612	13.5141398901106	13.4974954731313	13.7419037874054	13.5874208577192	13.4464555585472
21951	Microtubule-associated protein 1S	MAP1S	FCHO1||BPY2IP1	55201	5.45091106267658	7.66863868474946	7.05905449949849	6.30570369035324	7.8498206368456	5.64787757096176	5.42071951566359	5.38595793838822	2.69409732489128	5.73048110076928	6.09965575046887	6.21607660923734	5.94922702504474	4.84189272712074	6.40937415114802	5.90771785356128	6.73141119728018	6.1333347388561	7.50038412359644	5.99803795762582	5.72219146363524	5.2682976971827	3.69215418925699	5.32626819254916	6.50402959853174	7.32260419973808	6.61132280782639	7.26781518804851	7.12773766779924	7.19236273892337
377457	Suprabasin	SBSN	UNQ698	374897	7.27469971078981	6.97765371990954	7.25048222529431	2.67324868568925	7.16369123053701	6.39425821669127	5.33414596933882	5.45667932447184	5.97896454768541	6.01555496575948	6.54415549691066	6.66544701400965	5.76236984299014	6.2366352072292	5.97073936696466	7.44485461903593	6.42687910706397	2.69334755993983	6.47452127144163	6.6271100280942	6.17952679760084	6.40739134321966	6.47452127144163	6.00159062431806	6.50402959853174	7.31431907768753	7.8876684172207	8.02412515856116	7.86387671620694	7.56099519227884
282342	Glucose-6-phosphate dehydrogenase	G6PD		2539	9.08244493608714	8.9425095408236	8.87146483447787	8.29710128246581	9.37144581507714	7.63807693125991	6.213519554113	7.09300763583755	7.70458415819741	1.60263262718311	8.07764577016982	7.8412793931672	6.4427860565469	6.71975747917666	6.58508911619426	7.76200886606998	7.37838900965236	8.04971439962333	7.64462445712274	7.13918918420713	6.34762753529595	7.30541126694681	7.6395629264545	7.91098729492438	8.07276768887453	8.37777969702362	9.1298025740461	8.19953587835181	9.1842858564815	8.4565196406636
742125	Lysyl oxidase-like 1	LOXL1		4016	10.0343964447214	10.1311909553242	10.1955405561313	9.9662243764828	10.1984229083668	8.28091650798382	6.5292711547339	7.82919394433945	6.58299776472988	8.17458816795873	7.19267942460237	8.45434127079195	8.34606344310853	4.69472153768301	8.08782377618154	8.94088274230239	8.60572763905199	8.19953587835181	10.2071425306070	8.79954174392818	7.62056783692815	8.66906579777302	4.20482493225253	8.68505460897962	9.0778781829089	8.60572763905199	9.82187727565128	9.9084918965885	10.6609573407043	9.70533926402187
344600	GCN1 general control of amino-acid synthesis 1-like 1 (yeast)	GCN1L1		10985	8.93630220826653	8.47032461182583	8.781876092229	7.80429749367533	8.23676351757674	6.90228904979663	5.81553874720817	6.78281290857858	5.59017248407353	6.29700330423048	4.98798351587943	7.39698338272627	6.83886791629669	7.58448683551209	6.91224756210467	7.68495887839534	7.1068411911347	6.3421295372592	8.0197575922286	7.1505549369148	7.19896125750861	6.96962085657231	4.81801580391744	6.53080979720045	7.28857029056062	7.92208702897648	7.85908888183924	9.2943235888167	8.17238755015848	8.28369433492667
365646	Actinin, alpha 1	ACTN1		87	9.22338688159843	9.3492526614075	9.39073746378404	9.12137323471585	8.61629444791575	6.9246735124787	6.15013127689682	5.49629759659383	6.80807054825108	5.65700179876482	6.16382734903472	8.90543094541109	6.99706366381856	7.75012563684184	8.12327661246133	7.91358251804473	7.9129206644381	7.69181031621823	8.88301897627142	8.42816428726832	4.06281467789434	7.41559842949619	8.12491269190322	7.34545437491197	9.83699776409182	8.54732654511084	9.66391175972846	9.52216039561705	9.68798250441807	9.3731225173828
545646	Insulin-like growth factor binding protein 6	IGFBP6		3489	7.95263625090212	9.53929603776855	9.75068836510336	9.38018097776041	9.11000803644188	9.12815612366198	7.51085954252715	6.8943333179531	8.4694140398746	8.3640670370523	7.41538510791823	8.86481640716828	8.30873942715005	7.68856316350041	8.6209972577028	8.01897632353744	8.8770820824583	8.3471083867262	7.27882758714612	8.0298133202131	8.48336370852394	8.46225097076624	8.76555737300681	8.34093159396927	8.96062424128576	8.7104661269499	10.4801557251742	9.85185852380467	9.94976399448824	9.68574664337144
755015	Cytochrome P450, family 2, subfamily S, polypeptide 1	CYP2S1		29785	9.26368692500524	8.3260525893554	9.00292874790825	9.25259556378288	8.60461415964554	7.9298048528976	7.62962683492537	7.10399736016775	4.84864274719418	7.28777286190157	8.28041956261729	7.53817996683784	6.91861098129754	8.64014155104467	8.10799420001398	8.57698788305879	8.1361709152364	8.62226649162554	8.74452651212944	7.7948225644163	7.87149524756121	8.55509145378033	7.48712783545946	6.41203542129806	7.53883624522784	9.57555191706254	8.50548885633454	9.26894052350316	9.81681846274583	8.58527768131773
431990	Patatin-like phospholipase domain containing 6	PNPLA6	NTE	10908	8.98352936769846	8.08156004023142	8.57348963351487	8.8032409100554	8.58602584429378	7.13622734582836	6.18551844737144	4.32531968881724	7.7433978136695	4.11689928124408	6.87554373175579	3.87744917105981	7.0085720511319	6.41121973260372	5.41819955722521	7.81650735689143	6.74825995012392	7.0772790678523	8.48159360275022	7.27093492635779	7.77864193343049	6.54194279072922	5.98701354055915	6.74025213988051	8.62400948009366	9.0901092049689	8.30155863449376	9.13125067483095	9.63279105811965	8.65012843134919
42443	Small nuclear ribonucleoprotein polypeptide B''	SNRPB2		6629	7.89152753242273	7.14710298287249	6.48466868522051	5.89430280684022	6.87554373175579	7.56837590111498	4.82213715760932	6.63066180594778	5.59262166940187	6.43482653575311	5.8919297915219	8.2559058523522	6.17918582949231	5.81903956409728	3.68111473228442	5.92281771546524	5.09052283658605	6.41350448144466	5.88512755358975	5.29372016473943	4.21487240749629	5.91739360841372	6.99573602829448	5.79357861683705	6.15187557508287	7.80099604328796	7.21021341212297	7.9657694923966	8.7530942481084	6.74293594227138
772941	Eukaryotic translation initiation factor 4 gamma, 3	EIF4G3		8672	10.0654312392772	8.78814475796387	8.51678778604777	9.51576839697717	8.14986506992073	7.53048930995867	2.23236688411345	6.80728225962905	7.80099604328796	7.94360592438004	5.43429171437253	4.1977027154329	3.40928350882905	7.28976318233069	7.29315322984447	8.24644243926793	7.50813864151304	8.02039203967971	8.54578873586609	7.97374633495863	7.81076278293274	7.3369949457937	7.72786112350028	5.3873591594719	8.22479417606548	9.06393682756275	8.27199169315313	8.81857215409589	9.2573258398341	8.5640483309681
742112	Sema domain, immunoglobulin domain (Ig), transmembrane domain (TM) and short cytoplasmic domain, (semaphorin) 4B	SEMA4B		10509	7.67656202892529	7.73145196124575	6.93901376374039	7.65732941802483	6.47952447157069	5.18691910888675	4.59850014333656	4.27057625238879	6.30992024263402	4.91930538067483	6.15536242109212	6.81391652630265	6.96166975532698	5.60013639270668	6.80807054825108	7.7406404812294	6.34338744049922	6.17200017240798	7.30328322618953	5.94890316129418	3.75344950165187	5.9479836424132	3.84272826481256	7.90295920729027	6.46410962028866	7.33263748118866	7.24235829301177	8.04283997813307	7.43712283882142	7.43771382307743
289244	Protein tyrosine phosphatase type IVA, member 1	PTP4A1		7803	6.53325308424615	7.48642823786247	7.50247111353987	5.45941216329034	7.38927088763227	6.1621602470254	5.42071951566359	5.45667932447184	5.89162606503492	5.42856000675568	6.18888050686787	6.18127808746786	6.4164688549992	6.25346424696458	6.58095524044549	7.10432255848477	4.8940817259161	4.35860947455633	6.14644268122547	5.7205003576858	6.60109820598002	6.4294846076793	6.37800559913979	6.77880440876358	6.24151212228085	7.90015224638042	8.07001153843202	7.36195029584998	7.58378320977548	7.71168722819278
413478	Tubulin, alpha 4b (pseudogene)	TUBA4B	TUBA1	80086	8.05955303775045	7.99365876675777	7.5491559003518	8.30277273742587	8.21628106242313	5.61688380140194	6.35860669275765	5.19975464555132	6.73067037070565	6.59149867565387	8.60202125169202	6.29335203166259	5.81069364714865	6.17109558269202	6.21150591290638	9.69026128527536	7.94578227270845	7.52623073234972	8.08865935951505	7.56577646818803	6.63813514455001	4.53299698611654	7.42162239149444	7.70745340146754	6.91382675686492	10.2900335926262	10.1955405561313	8.55940481903535	8.61824972915653	8.99719614354205
245242	Carboxypeptidase B2 (plasma)	CPB2		1361	6.75830049913785	6.76655050409902	7.31139801206113	6.93200164884744	5.48502831078622	6.52140600504814	4.5404120583414	5.24418316135888	6.01555496575948	5.85715345944471	5.69807404074843	5.41876372326561	6.58095524044549	2.74766612941369	5.57106855764618	7.01856396336467	6.93329800667576	5.54311749716008	6.637084766964	6.35134072104024	5.99275803506341	5.82902520033416	5.77393207975182	5.26107550352623	5.87689457006695	8.53022228577071	6.11624639628279	7.53558788198619	7.65491423606892	6.8612187591941
490505	Spastic paraplegia 7 (pure and complicated autosomal recessive)	SPG7		6687	7.5046820792601	7.35471750420405	7.60649020914565	7.69550924282551	7.13103102961799	6.25460453706987	4.23020289173676	6.23601600900964	6.63066180594778	5.53508216097954	6.13037913345999	7.39913099646244	6.56620858199055	6.45775879764227	6.82488726139615	7.88291289104996	7.0556520041048	6.40260113834956	7.57033284842965	6.03150858222363	6.52839575043531	5.57998992106721	6.28660644960566	2.9036454502366	8.23603732201963	8.86263226979844	8.31282692643789	8.49646012784295	8.04341060405542	6.78814857910807
1753917	Mitogen-activated protein kinase kinase 5	MAP2K5		5607	6.97325232692681	7.14943843359503	7.328364184891	6.4291312297292	6.05997330887242	5.58189560877353	5.73048110076928	6.06262855795586	2.84681303943681	3.65932485193538	6.37818975318565	7.44646632794624	5.9846913709063	5.66000537326937	5.1799248330002	5.54432866886262	6.26726376305086	6.14661201402168	2.28426156603772	3.81363184121537	6.12730055865619	5.89228034310688	3.08585596824463	5.86870418896438	6.51335715657546	7.19459791049813	6.73067037070565	7.34199151598915	6.93700424982433	6.55041559711789
756284	Duffy blood group, chemokine receptor	DARC	FY	2532	7.0163601301635	8.5103196290531	8.74061630634894	7.9318083099793	8.10853425766228	4.10074549672939	1.01324739718931	6.7934529874918	8.35820118822592	7.99811684414784	8.05452970556847	8.44117663213556	7.8498206368456	9.12545559949642	8.01817728513948	8.08279580406081	8.15433442638265	3.56203563374096	8.8564872377671	7.48371292253093	8.10412935638415	8.52495817458078	2.62995784829843	3.11211547315512	8.32047740339102	8.39023726684221	9.20970598789047	8.13052083434744	8.790956086895	8.446318794603
365494	Polycystic kidney disease 1 (autosomal dominant)	PKD1		5310	4.77351566708877	6.02647529176707	6.14735307435063	5.0911507997202	4.49018420551395	5.18691910888675	4.8409722799188	4.61759532823898	4.48210589358988	3.09480263540592	4.30831137769137	4.62929943502317	3.48137027557516	4.04373404746197	4.25808294274203	5.91360221014872	4.96775522969522	4.83853575600542	4.23738606371327	4.06482801882573	4.86379420381107	3.55361714352419	4.10003018360893	3.30755764440176	5.3063965974484	6.68519123314183	6.23248589761642	6.44819342974666	7.13196348479082	5.22277839823852
756450	P21 protein (Cdc42/Rac)-activated kinase 4	PAK4		10298	6.98822500884071	8.42172917023662	7.1934073001144	6.7413897550064	6.0722235294201	5.36467049836116	5.35926999987509	5.07833865214105	6.08367287432012	5.98194619947161	5.8276900115872	6.28002409720307	6.45639886702979	4.96828400667591	5.83728420808052	5.90193614997022	6.92529696547897	6.4637553453272	6.39113629810778	6.59050912062906	5.99275803506341	6.92577647698393	4.53694997633484	6.23153062853411	4.68581332368734	6.47578344530586	8.09313311777405	7.20311084129373	7.82342035195081	7.31282007074095
118592	Interferon-induced protein with tetratricopeptide repeats 3	IFIT3		3437	5.37342740792817	5.66759283184402	4.16950897453909	5.95181181754249	6.34279596180328	5.18691910888675	5.22483574210902	5.76362209949991	2.94897484989555	6.08954953985237	6.81581776273957	7.5443977606269	7.29315322984447	8.1391604805036	6.5458357077506	5.7213233347204	5.67823797419299	5.38183724814807	5.88512755358975	4.92377879185763	5.91025751765471	5.76715777137801	5.68389273928598	5.9598488241576	6.47466681517222	4.25459721218048	4.02235025334222	3.99930859053141	3.58273724884762	4.83810685596626
504673	Docking protein 1, 62kDa (downstream of tyrosine kinase 1)	DOK1		1796	7.29385437171383	3.93301827881412	5.60732001209294	7.71707031092499	6.7374705988388	6.20966774267292	6.59419985964159	5.91958938255588	5.78675763379576	4.1223293488762	4.05524810809554	7.53558788198619	7.12703553501674	5.52050629487102	7.36506297291439	7.6112246842259	5.6572322822065	7.01926857899548	6.86199500549796	8.15037819269219	6.39113629810778	3.08897403257932	6.97632882852277	5.86870418896438	6.59050912062906	7.72728523776545	8.26437920161405	8.39617804113817	9.19357784709357	7.92870139320789
510677	Lymphotoxin beta receptor (TNFR superfamily, member 3)	LTBR		4055	8.17996143477692	6.70556469622362	8.60572763905199	8.17122734185567	7.33792120342106	5.78035246378205	5.42071951566359	3.93055882331952	6.68921665197468	6.14385462176176	7.14886976415936	7.38755902810929	5.64602909578836	7.53952878931597	7.17489805627856	8.13580935818832	6.72998228080526	6.37543541955807	7.12448666845126	6.23009615775959	6.64399337624556	6.18888050686787	3.20056901422016	6.4193716760626	5.65942308900522	7.72900069305959	7.64373451431843	8.0462746017374	7.68927294854194	8.69567612469986
743114	HSPA (heat shock 70kDa) binding protein, cytoplasmic cochaperone 1	HSPBP1		23640	9.74618192948242	9.4350600455548	9.70533926402187	9.2823899863969	9.28377817807898	7.57402412075592	7.90738491550293	9.27883394480437	9.40382265087014	8.5507197574255	9.20673412557313	8.76982335740658	9.17641057848788	2.35060466639403	9.07467207168697	9.12424455640278	9.21457737648221	7.11732105658515	5.76260280547593	7.36971646512262	9.05002098870901	9.5560351237026	2.62995784829843	9.1567834149923	9.36810130366486	9.19546057468356	9.17921599227602	9.57345192016781	10.3466937029082	10.3435613354294
376607	Minichromosome maintenance complex component 5	MCM5		4174	8.56018295134697	8.01069726034381	8.9381028107235	8.63339384624224	8.330666516504	6.52527696527136	3.10451847167700	6.59806171947775	6.38138359512453	6.44726426467947	5.81932379058599	5.79380906319866	6.41567973510711	6.82488726139615	6.93556716711519	7.9475910280345	6.98317762621248	6.97391148123471	8.18901403482976	7.03618965690279	7.28799833354179	7.25908040775578	5.9405280779428	6.89158732569848	7.66108623188786	8.80894536823269	8.61247408673903	8.75910044739703	9.29262443795284	8.30593961328575
28425	ELOVL family member 5, elongation of long chain fatty acids (FEN1/Elo2, SUR4/Elo3-like, yeast)	ELOVL5		60481	7.19001607788061	7.33468521693312	7.45751673336446	7.49465573947327	7.8973498668053	4.89186059364315	4.51278096104318	5.7099715463893	5.53464517667892	6.32824174421556	6.02032524226679	7.15152656300403	6.17918582949231	6.07437302211634	6.05282527736276	4.03544294905806	7.44155051291965	6.21955576916691	5.38786736592306	5.86769495073976	5.79509436079173	5.5141054017233	6.1175896788174	5.53730442336949	5.086428857157	7.12635593434903	7.72944531910184	7.37565062381034	8.95308802846054	7.7180793445447
666128	Complement factor D (adipsin)	CFD	DF	1675	7.01178739253686	7.50123866663374	8.21676565464073	7.59948882465668	6.99171234630947	7.87975461496447	6.59419985964159	7.22415244966366	7.21111333885326	7.3964817650917	7.42480405386562	7.58523524516962	7.62962683492537	6.51178454930828	7.48138279443539	7.50813864151304	7.45550215513711	7.32424493213262	7.88089002607282	7.21741832482312	7.16582514113365	3.76031360105018	6.68438044956115	6.70280722025112	7.29837308919791	4.37663262263837	7.70855582086389	3.25726728483099	2.79565295394440	2.76168251062615
452214	solute carrier family 9, member 10	SLC9A10		285335	9.12815612366198	8.51108018166282	8.7847743399162	8.8264456092414	7.92159213168193	6.57122148498653	5.43647435429601	6.43966416327213	4.01380851707642	6.50170292174412	7.09112874191434	7.59652227901159	5.40703859741293	7.30866048695692	5.85165021788784	7.98061577915838	5.69389492675143	4.87328445752721	6.08103672195601	6.94863152525355	6.28889804319448	6.70322318777295	6.66663537211722	5.80187204229207	7.79202790816912	7.8876684172207	8.39404943478105	8.17996143477692	8.71169068560767	8.60202125169202
612581	Pyruvate kinase, muscle	PKM2		5315	13.2573417347899	13.1640720980581	13.0616385445795	13.2433583211553	13.4631456512606	11.4636271355883	9.14860502362336	10.9376970351551	11.1866862501962	11.0665131076541	12.255873952431	12.5432119672612	12.1481731915282	12.6781566817960	12.5290498275591	13.2433583211553	12.6643482997752	12.2208717219564	12.6643482997752	12.1678444822880	11.5463846927751	12.0639439011325	11.9868147613882	11.3489315278646	11.7158635570770	13.2882108803749	13.2703292992372	13.3418682900062	13.1169739828243	13.1493101957274
713676	Vinculin	VCL		7414	8.67487771122003	6.27461169872366	7.81798798520162	8.8872891926181	7.82374966257854	7.13622734582836	6.61489105476045	7.20651967919743	7.08637241838123	6.46267776313681	9.40090946453882	7.46186121425634	6.81391652630265	6.47164846422708	5.34221985595787	8.23398020687753	6.4545348706233	5.27294597606233	8.81088869305145	7.61542907897823	7.36383118077057	6.11374628652222	4.191902548815	6.72931311822042	6.9040013632334	8.68180039706065	7.89152753242273	8.03528754836582	8.48942016007375	8.96690426687838
740545	Eukaryotic translation initiation factor 3, subunit C-like	EIF3CL	EIF3S8	728689	12.7840928513721	12.6917144963397	12.6035855138371	12.2997326883007	12.0347245701458	9.98190164502144	9.3385179187649	9.84420421184156	9.84758256693146	10.3653178588624	11.3133779586912	11.2616677526354	11.2209483130282	11.256528573378	11.041645052259	12.1758842108379	11.5967161937988	10.9743543601511	11.4421186408925	11.2043804522864	10.9195496337899	11.0560262116816	10.7130427365867	9.52216039561705	12.3957164162852	13.2072385958697	12.9246436700915	12.7649603330107	12.9407804642671	13.0155379535506
754767	Niemann-Pick disease, type C1	NPC1	NPC1	4864	8.57753807597065	8.4576112215078	9.18568929241868	7.39698338272627	7.80283108379359	7.80653208386955	3.12394359038742	7.76790272380217	3.40928350882905	7.86353795166913	7.40724582753422	7.15304825670877	2.45376135706848	5.13544953703313	5.98495287825561	8.24644243926793	8.18588559419355	8.790956086895	8.36223189819343	8.21207883153033	7.71168722819278	5.13028772717039	2.78621916335862	7.65067345543705	5.69783899665413	9.44111152061182	9.10517469486301	7.01404484294108	8.31709872002835	8.64014155104467
255904	Thyroid adenoma associated	THADA	THADA	63892	7.3565392551654	7.27733614447282	7.34148926600887	7.04246131140297	6.87398875352636	6.11039806828698	5.50221496914246	5.76362209949991	6.42645718260743	6.05148989992512	4.01564441146132	6.78633870295391	6.78903130196579	7.01899194425784	5.13354869926529	7.87543325557972	6.97765371990954	6.39042605682377	6.49979846573813	5.69434400056874	6.39113629810778	4.8529343960476	5.96301329433685	6.57122148498653	7.15018077593264	7.39126289829809	7.30430785046086	7.62595778530249	7.36994487525402	7.63702977961855
1117212	Versican	VCAN	CSPG2	1462	7.50935509343966	7.38486269643254	7.59948882465668	7.67188644630151	6.73638608849709	5.44363890957937	5.44853455744682	6.01781340305934	6.08367287432012	5.77238766168595	6.2887352711265	5.06752149815126	6.25869602339147	7.24235829301177	6.5179010697369	7.54296299965643	6.36862774236374	6.1333347388561	7.60649020914565	6.8758603621927	4.99556824096298	5.08574337974852	6.4147514924319	6.88279548226716	5.40210754367601	7.19766275113552	7.23352684718621	7.13622734582836	7.88689535388636	8.56106421575538
156386	Flotillin 2	FLOT2	FLOT2	2319	7.57682694215167	7.59976904559954	8.66448509070334	7.84281059876218	7.72944531910184	7.05651870736914	6.11241113199884	6.04566843507158	5.30927486816011	5.63596235770948	7.8103816815571	5.28418716977095	7.52985466850859	7.1971358031037	5.52955534294506	8.12754006679073	7.44964849306235	7.3432894632829	7.73469300860324	6.94863152525355	7.04654991836019	4.85794163691282	7.48712783545946	7.074158742057	6.60716501010596	8.01542413922832	8.15697597154286	8.66906579777302	8.96532790310861	7.92371354919817
257445	Ubiquitin carboxyl-terminal esterase L3 (ubiquitin thiolesterase)	UCHL3		7347	8.84919389752238	8.87431144098874	9.57243320076334	8.54212861389324	7.75608508957757	7.05651870736914	7.34614858797052	6.95941976040403	7.1308141708273	6.61489105476045	6.88705514912811	6.7374705988388	5.93359093895002	3.89073758638898	7.19896125750861	8.10929137112038	5.37651008963696	4.24464985564366	8.66553168023767	6.8758603621927	7.35969118757167	6.45184583626952	7.16941704082628	6.33880223695124	9.7698346077755	9.30645299374792	9.3618062820821	9.01833467181016	8.02761638245471	8.78814475796387
745019	EH-domain containing 1	EHD1		10938	6.49957634661575	4.73815641028745	6.39490140343403	6.14706722897122	5.92351441863001	4.77009930279021	4.15894517082661	5.07833865214105	4.97299450458789	4.84738646009972	5.66511099863696	6.09214041703298	4.9304940737012	5.94922702504474	5.71705273551445	6.32111892013393	6.03049114025195	5.67672146634499	6.7752831326467	4.14525856865973	5.76260280547593	5.57998992106721	5.96301329433685	4.95493322797573	6.11855098257062	7.44083356291362	6.04396171643689	6.63901458985638	7.11258566106568	6.56730292407806
306047	CDP-diacylglycerol--inositol 3-phosphatidyltransferase (phosphatidylinositol synthase)	CDIPT		10423	2.96423922606215	7.33853485232514	7.45841323269604	9.00090064527197	8.67541431840613	8.39576032474202	7.39571701464631	8.46433513433846	7.01375207927718	7.24977640318426	8.46807093903397	8.57808805913835	8.55002571424316	7.34399118191478	9.97692590168022	8.92924698315876	8.62350387625945	6.11804526875298	8.84749023439926	6.08743766369258	8.22360813325774	6.30606446622487	1.12903776403166	7.74823239893717	8.19323228744769	8.99206881641833	8.65185559542977	8.34982921109693	9.93968424118447	8.85258692875084
487446	RNA binding motif protein 28	RBM28		55131	7.53223423025571	7.85202245084453	7.1934073001144	7.33375532212165	6.7651339513982	5.68187443736673	6.15795351435876	2.72974291499628	6.63066180594778	5.98194619947161	6.24859266020452	6.50855376682468	5.94922702504474	6.2366352072292	5.92966854210853	8.8032409100554	4.50373769554502	6.1333347388561	7.472310192254	5.6572322822065	5.89628411333721	6.13929261806332	6.4147514924319	5.86870418896438	6.47466681517222	8.10853425766228	7.49765769581733	7.54185966244403	8.37777969702362	7.4534359200518
506501	Histidyl-tRNA synthetase 2, mitochondrial (putative)	HARS2	HARSL	23438	7.27254552208623	6.84897447008799	6.06607147351965	4.28671858658114	6.40842218983046	6.64721999933793	6.68232426727621	6.36167890933601	2.66362565613467	6.87269582050235	5.83799332573101	6.89895376484841	5.94922702504474	6.8372083459841	6.52732258770684	7.32916817159981	6.97765371990954	5.32164272350064	1.86611607535252	6.44428759019937	4.01525694982595	2.29301466362122	5.47017180618257	6.72931311822042	6.6713645945276	7.7426214708127	6.91195054783987	6.96868850417244	7.56454796549397	7.82224498299538
742139	Nicalin homolog (zebrafish)	NCLN		56926	6.93724064420142	6.70363903539481	6.39490140343403	5.83362320981715	6.58181244247003	4.77009930279021	4.43913389490023	4.91437566996766	5.20337898137922	4.33229267479687	4.97492278552768	3.88566008061062	4.46984786134104	5.10373266763283	5.11164744277874	5.1910279704593	4.91649894260542	5.2570750876061	6.45639886702979	5.32164272350064	4.65396520995061	4.8092695265916	5.13002178503038	4.21272723856291	5.65374077870657	6.18888050686787	6.3421295372592	6.54287452869271	6.15124138282649	6.65233655432663
150443	Asparagine-linked glycosylation 2, alpha-1,3-mannosyltransferase homolog (S. cerevisiae)	ALG2		85365	5.74927329827351	7.23570403833748	7.39320728308383	7.16172647042291	7.17120562370536	6.99706366381856	6.5619271535175	7.03299618701246	6.81953177008126	7.03891773074395	6.91999897471354	7.74894383656535	6.96166975532698	4.90669883225777	7.10838616210033	6.74684890782077	7.22724456396926	6.91527278781298	5.44230654803531	7.01345925619118	7.06745988983523	7.64645617521783	7.43712283882142	7.42068800669519	7.45103720507388	5.79066688589854	4.69258239805943	4.15894517082661	2.23236688411345	5.1412370084343
375721	Peptidylprolyl isomerase E (cyclophilin E)	PPIE		10450	6.17200017240798	7.40793137275	7.3432894632829	7.31774675753126	5.89079914367554	7.49376480145764	5.45965209423515	5.52442045943548	6.20310325023664	5.94127980996392	6.21255086991934	7.78558841766665	6.59080565580885	3.15763474844343	6.45081151084432	7.7414305313512	6.21533109032924	6.16986587078587	7.07998091080163	2.52439342970194	6.27843063739558	5.82902520033416	6.28660644960566	5.14311192325797	6.79047408739127	8.05836264260124	8.1162913028946	8.47586558047844	8.19953587835181	7.03989425111461
126761	Prosaposin	PSAP		5660	10.5610035030737	10.8010639341241	10.0489304807246	11.1759842109528	10.6080378242093	9.34196852874826	8.324271497442	8.91694041197384	9.00769638423427	8.74452651212944	9.7997987333372	10.1054205824749	9.84758256693146	10.9329498971830	9.64184288804628	10.0036003965803	10.8390261853116	9.13668204675491	10.4171696155328	9.97441099890199	10.0036003965803	9.96853051688767	9.49792873547655	8.41184300377129	10.219287229825	11.3133779586912	10.3906368218553	11.2209483130282	11.0969059074638	11.0376040947677
52727	Solute carrier family 25 (mitochondrial carrier; oxoglutarate carrier), member 11	SLC25A11		8402	7.57402412075592	5.23278520961109	7.24297794034128	6.9416339878263	7.74894383656535	6.0850252953621	5.43501083362784	6.78281290857858	6.63066180594778	6.44726426467947	5.92858977223648	7.6209585844815	6.1248794095177	7.55713453670874	6.93556716711519	7.64809972964024	7.57647190899534	4.74401117614833	6.82957904040073	7.42986618051301	6.83550559018497	6.79662802113329	5.55225784078515	7.09941031923071	6.79047408739127	8.36025589694376	8.3760462038381	7.84687084787275	7.4292425863988	7.81885820399567
210702	thyroid hormone receptor, beta (erythroblastic leukemia viral (v-erb-a) oncogene homolog 2, avian)	THRB		7068	8.3791041716501	4.16614973180232	8.02039203967971	7.98700535271752	8.27144535314183	5.61066278204513	3.22094704586801	4.3399535681678	7.10936948668304	3.64166308820081	7.05818460826799	7.75722898177648	6.99367364525784	7.70421763570744	5.71705273551445	8.69482674505133	6.25869602339147	8.99985606171492	8.4613210387303	6.80568510620379	4.29962769260665	4.3856167030948	6.89007346634371	7.00973243331165	6.95806001716392	7.71420040556525	9.1567834149923	8.58819233341105	6.62866125281541	8.10679139358689
249136	Dynamin 1-like	DNM1L		10059	8.06763879345243	9.0404653603237	3.07273402936283	8.9381028107235	8.80372461485265	7.46226355955072	6.72708647313469	7.2441152522865	7.06745988983523	2.44384581636218	8.05368818156295	7.28552439909489	7.03781677485477	8.2869147687734	8.75605822860896	8.31625453243523	8.42763192072862	6.69899735590043	8.75535073393471	7.96517621580223	6.36298291583364	7.54185966244403	7.21021341212297	7.38104285088684	8.00682049613589	9.04340999836914	9.02841149017236	9.02148243983715	9.8531502603432	8.79780286959761
253768	Tubulin, beta	TUBB		203068	8.25033500134118	7.84599405261436	8.42062531978773	8.38829152942415	7.56577646818803	6.30314129331667	6.11241113199884	5.58889629509684	6.71716762274933	5.98194619947161	5.66448385301751	6.62339511674097	5.6682791162929	6.63548566619234	6.66876969260804	6.04948257465375	7.90534006396494	7.49765769581733	7.56876464440274	7.27093492635779	7.06745988983523	6.93987180376787	2.98154921852332	6.60475964368937	7.51806795708488	9.17344449492906	7.66553876364107	8.26437920161405	8.38048658092127	8.14526864722715
754479	interferon-induced protein 44-like	IFI44L		10964	7.59860555487814	6.01909802867576	7.67522045027567	7.7205643213191	6.51890210437092	7.02624397065659	6.61013565387048	7.20651967919743	4.43131616335876	6.76066816045218	5.49619644977259	7.61375048100734	6.78903130196579	7.26010041512502	6.82622826404157	7.00624910456329	7.03404426239444	4.6059661090907	5.68294015223124	7.16824001759988	6.81287734682368	5.54475661771319	5.3501069455535	4.73498909549198	7.18803528625607	7.32067003919634	7.26368350837353	8.1790524914074	7.77074981670722	7.65067345543705
435649	Gamma-glutamyltransferase 1	GGT1		2678	10.1350112262065	9.87717874232482	10.0169593739384	10.2833369282526	9.83168245102453	7.98277386628536	6.99126009145377	6.4164688549992	8.16533366534646	7.97093956864558	8.27920965837632	8.26134727569534	8.72961667009716	8.85414901590837	8.47943659639528	9.95927784394742	6.71559366394931	8.12814429301649	9.5381689828389	8.34813117335975	8.523418517463	7.7518207823156	8.25801121078875	8.12900467860297	10.2644303698564	9.71445846985787	10.7087053440115	10.5156542372308	10.1434474513542	10.3269000954637
485898	Single immunoglobulin and toll-interleukin 1 receptor (TIR) domain	SIGIRR		59307	5.37039717240984	3.83846514588347	4.68859337187967	5.63352438649053	7.73547697583186	9.0967387947806	5.64946266164418	9.44737877956594	8.90696741032133	3.44289101799044	3.20415260602977	8.92530745972645	8.24303497792792	9.21109657486473	8.4473159951267	7.14178913483883	6.97047954788368	6.99050218846822	8.6907665488525	8.66770760012282	9.24515862972523	9.05772380722813	7.08406544250153	8.97482264656432	8.68692673366549	7.69705223285086	8.78971310659806	8.7775179045579	8.93321857694885	9.75835325417797
129076	Testis expressed 264	TEX264		51368	7.45993467522649	8.81088869305145	7.82500283433977	8.70618480163784	8.20323850836869	6.72228140427795	5.68795144606532	2.97657681157172	6.27568899795439	3.6987916886604	6.87292809059584	7.23062716483063	6.29564137107932	6.87033564843133	4.93441870898572	7.62516241218102	7.71707031092499	5.95502283239212	7.92677902071104	6.52507596137686	6.87484320942297	6.32368901382452	7.15189748585795	6.53080979720045	7.81250525734993	8.35532544580665	8.66553168023767	8.45502470857718	8.35735225057454	8.36139810136054
586942	Lon peptidase 1, mitochondrial	LONP1	PRSS15	9361	8.00760065664579	9.47686246708285	8.30155863449376	8.23452498275024	9.11128559918317	9.11875495128438	8.58352174971776	8.41097720956937	8.66770760012282	7.45617048397473	9.07467207168697	8.56811785103193	8.02946625299516	8.13653238169657	8.191387314537	9.33697140227938	8.7622755132338	6.77657212483842	4.13781477362512	8.19461900663708	9.5335305213646	5.03548331917512	8.98544029577185	8.74384657159664	8.8460562963637	9.78687882138665	9.9639545031181	9.65627491065748	9.97441099890199	9.89232751284338
166193	B-cell receptor-associated protein 31	BCAP31		10134	10.2131309796305	9.27465168351411	7.62595778530249	9.87217787449622	9.54450916412772	5.87975655337012	7.23991222629317	7.92159213168193	8.12953071431038	9.23942651064154	8.37986129594925	8.37155093639117	4.31730269431713	7.01318112964623	8.50061834539727	9.28481431046199	4.7143107374867	8.49270988591133	8.80894536823269	8.3791041716501	8.2905019349794	8.20194743318454	7.92327802117115	9.67263528471354	8.74534084776692	9.47082209961686	8.99206881641833	9.37144581507714	10.1025557797656	10.1148942811066
307025	RAN binding protein 10	RANBP10		57610	7.70385102007729	7.22531255000804	8.21983472908448	7.5491559003518	7.60229422653547	5.84338123877376	5.38756748033363	6.21666851133942	6.27568899795439	6.22109745239458	3.21703311021717	7.35329983810941	6.27871204193223	6.48673180914905	6.66876969260804	3.65932485193538	6.67463165065956	6.21955576916691	6.79197617714634	6.83043698228184	6.68324738529501	6.18888050686787	3.72935141361954	6.62231332652486	7.43539440970765	8.42260463757129	7.46821054417537	7.98138889611721	8.54212861389324	7.94844308235262
309697	Aldehyde dehydrogenase 1 family, member A1	ALDH1A1		216	12.8838332138728	12.895750021644	13.2703292992372	13.3418682900062	12.8554924572340	11.0169209139663	9.55696292548669	10.8305697392401	10.8344627646950	10.9482020494472	12.2208717219564	12.6643482997752	12.4750028276158	12.5553964076438	12.2997326883007	13.3242691171337	11.9674636257221	11.5687088315637	12.5290498275591	11.9868147613882	11.6707596219174	11.3820705919485	11.8428664160588	11.4485367137447	11.9868147613882	13.5499570042595	13.4631456512606	12.968872692609	13.4296988834693	13.1640720980581
768644	POM (POM121 homolog, rat) and ZP3 fusion	POMZP3		22932	9.65751428594296	8.59881837144111	8.20323850836869	9.52885512735042	8.9613833856483	7.60984078695418	6.00237036798001	6.57871627154577	5.56469218071249	6.27363494990498	9.9541825609229	7.84357276018264	7.71352355472245	8.29978880579977	8.3672049515253	2.88011705153472	8.18244979043998	7.7534491842877	9.132645411248	8.65494671466136	7.92677902071104	7.50521136851011	8.47798778735176	7.78558841766665	7.8001107550654	9.5690490782368	9.22338688159843	8.60202125169202	9.79776573326125	9.01574572583718
755207	Family with sequence similarity 127, member A	FAM127A	CXX1	8933	11.6315719536551	11.3616414994791	11.5967161937988	11.3965086524715	11.2107721976313	9.94528841148154	8.9613833856483	10.2806613309124	9.71445846985787	10.1931838342465	9.6923578732977	10.8568412140326	10.5719252432956	10.8139390375909	10.5483990052456	11.1759842109528	10.6688578273338	10.1249852644672	10.7087053440115	10.3871035188629	10.7903621854251	10.3035527897409	10.8776491384916	9.9956473800299	11.3424618473792	12.0541994857217	11.6707596219174	11.6555606281538	11.7983268712171	11.5388504445384
73196	Cerebral cavernous malformation 2	CCM2		83605	7.83585203729424	7.26440919381079	7.84475273432858	7.55998067399032	7.35811031662607	5.2292149206666	6.84384355012806	6.53848806809087	7.22924063230544	6.41838338910066	4.89147610053259	6.57774264150543	7.20578505391228	6.08678289291649	7.41286725970432	2.90187506606091	7.46456429651073	7.38439906390783	7.71241522593401	6.88578073110171	6.60109820598002	7.44830561215305	7.11935125166019	5.69602111420376	6.43994618348588	7.72376461593066	7.57470345417652	7.97374633495863	8.0298133202131	8.39659563662416
273725	Dynactin 2 (p50)	DCTN2		10540	9.39470335492422	8.32369877487348	8.4186707171074	8.64771521244909	8.70050570223897	7.46226355955072	5.92824484153664	2.89590846480624	7.26737645044568	7.16369123053701	7.90939677418943	8.14593988255354	8.16873597805615	8.24303497792792	7.71862868045423	8.52174963348544	8.1150433208206	7.66762831022282	5.7177566693636	5.74763214086243	7.46645404535285	7.93430299162136	8.51768346447556	7.1211052648604	7.82727886887052	8.77467349115757	8.7530942481084	9.97692590168022	8.84245930433151	8.57602482441034
278926	Leucine rich repeat containing 16A	LRRC16A	LRRC16	55604	5.81014573057165	6.32722716072055	5.39404475261738	5.69830904655556	5.58189560877353	4.6410228050845	4.32304050425049	3.90935689493073	4.6884439836142	4.33229267479687	5.630838029632	4.88835792397385	3.91064918143418	4.37457180532262	5.11164744277874	6.52417518944968	5.16197981817735	4.83853575600542	5.14720492494223	4.4365940072588	5.24759888083541	5.1808244166048	5.43561066109849	4.95493322797573	5.48541383380691	6.5771704124653	6.35332259316086	6.24050303601591	6.47466681517222	5.81745932765687
23876	Immunoglobulin mu binding protein 2	IGHMBP2		3508	4.37663262263837	5.42967157525483	6.02675104250727	6.17598372997431	6.37904078289471	4.77009930279021	6.73923927064332	4.39298646528239	4.78964383158731	4.63724621925795	5.11534002668336	4.86845375271703	4.9304940737012	4.90603431204937	4.84290963192573	4.97136165042632	5.42856000675568	5.79334813365962	5.74463524095171	3.19675991618987	4.72974979758666	5.55061115349939	5.43561066109849	5.56166256286243	5.05792114008919	6.17621450231072	6.44069231791163	6.60109820598002	6.41675608023762	6.14288710085604
139354	CXXC finger 5	CXXC5		51523	6.92282425332347	5.92824484153664	7.93540277129667	7.5872739785518	7.25803641431389	7.05651870736914	5.04840064874079	6.14147243575175	6.41121973260372	6.91721702387227	6.74921202727414	6.35644277652711	5.52675079895169	6.66390618792005	7.09574978274963	6.08299837687886	7.06322730041887	6.51266496304992	7.01178739253686	6.57452263325593	5.6682791162929	6.85283170384962	5.9044255513463	6.39068402985173	7.5134386482816	8.82438863369226	7.78321086944999	7.43828890309822	7.3800927648538	7.50366379862661
382459	Lysosomal protein transmembrane 4 beta	LAPTM4B		55353	9.51161183590658	8.8770820824583	8.98606704225313	9.02966060956733	9.4275278405092	8.40271272360819	6.38175635668657	7.38967966492674	7.55441010650364	8.71912740531919	8.66967377399207	8.48510713416071	7.75385934565856	5.14149652607829	8.5280107232968	9.66595060936893	9.20970598789047	8.1173328324604	7.39762616821585	7.61882328148493	7.74501910577089	8.697850582103	7.8596961667131	7.58342689421294	8.06391421643178	9.33621589538775	10.1613000885811	9.40090946453882	9.58267210508333	8.95608256426236
703573	NOP2 nucleolar protein homolog (yeast)	NOP2	NOL1	4839	7.05392880206778	6.82679504294053	7.7557779207323	7.33375532212165	6.80398781904574	6.54060174160559	5.26696855591716	5.42323561214602	6.68921665197468	5.73048110076928	7.00771321407105	6.36260166494204	6.24404767883378	5.29008740059453	5.61172521405483	7.6663698663669	6.34338744049922	6.08475793951199	6.35562973869873	6.3927382425663	6.52839575043531	5.57998992106721	7.82610775962734	3.51869050071671	7.1401739946535	7.7403373853844	7.70200993809423	8.05146785113905	7.89152753242273	8.01587686496182
417424	Transient receptor potential cation channel, subfamily V, member 6	TRPV6		55503	5.3680914325617	8.20439462694013	9.01833467181016	8.42370745715504	5.71724258200915	7.28125997271936	5.30807875929519	7.15092900088398	6.39518403814435	8.159481201968	8.14189545351552	6.18671981391554	6.56620858199055	4.08326050381297	4.65276239480806	8.33513930153972	7.42448377810611	7.64540998790998	7.94932151009447	6.81550611799145	7.7827877975276	7.38139413726327	7.7849088524992	5.63537614148449	8.40786623038366	8.637876489977	7.8308192902571	8.83172962766495	9.16301051502722	8.3734089602287
531991	Pentatricopeptide repeat domain 1	PTCD1		26024	7.43950090819898	6.33928512421075	5.27771997161435	6.98098841872558	8.31625453243523	5.32866811102723	4.5733355980562	6.43966416327213	6.83835373842334	6.99515083452174	4.55616890866819	6.82590117876972	6.32398822764291	7.67867400957654	6.71689563221098	5.87897283750212	6.6868800113817	6.67246719169533	6.87484320942297	7.92586894324884	6.68324738529501	2.7946626285231	7.91745205596879	7.13848373355787	7.51806795708488	7.20504757898424	8.46225097076624	8.06229083409913	7.39126289829809	7.85640097720754
632190	NADH dehydrogenase (ubiquinone) 1 alpha subcomplex, 10, 42kDa	NDUFA10		4705	3.05560095487170	7.14526155192302	7.69917267725533	4.69514017318328	7.69917267725533	6.72228140427795	6.05959868533459	7.54625866068843	7.00624910456329	7.48642823786247	5.53040263284228	2.79565295394440	6.98461350428791	1.47446890290961	6.23976777100949	5.95463714424142	5.58156362983088	7.64540998790998	7.1655846712315	6.71173808130234	5.40059575364957	6.85283170384962	7.29385437171383	6.70280722025112	7.35151901516078	7.02320674136042	7.77414548116562	7.31311178594294	7.57241586702267	7.4727272084916
380144	Basic helix-loop-helix family, member e41	BHLHE41	BHLHB3	79365	5.26226734219544	6.55041559711789	5.87527070947727	8.4017655007808	3.13650707266332	5.09255075929272	3.25726728483099	3.18273000757375	5.50852342948565	5.58750646863	5.96252998771786	6.24344735964154	5.76236984299014	3.30946426549374	6.07282966440989	6.43243776908704	5.42856000675568	5.06821772749372	2.73856263161659	2.94330712398906	5.92709569585683	5.9948081238757	4.64813591823383	6.07665664158331	6.3234467476542	6.49044598559648	6.64214722794176	6.1129837986423	6.29162943450707	6.98577926145097
112641	Actinin, alpha 4	ACTN4		81	11.9474342939542	11.5388504445384	12.0155190376133	12.0541994857217	11.8428664160588	9.15923058912919	8.02448400037201	9.0838323627687	8.86757765306003	10.3502662877163	10.5294933398598	10.6205207568315	10.219287229825	10.5935809955532	10.7803619872404	11.3133779586912	10.1984229083668	9.14860502362336	10.9482020494472	10.1646730406592	9.61128358983222	9.14713354209254	10.0746155891767	9.9059268482517	10.9994662148032	11.8886738265169	11.9264571181595	10.7648613052263	12.0954361134941	11.9674636257221
2238523	Zinc finger protein 215	ZNF215		7762	3.06886499419577	6.01947223185605	5.25571345498673	6.91085047498153	6.2558714822259	4.36810359223119	4.49084123175216	3.83704742527987	4.36546420030639	4.80274129897164	5.19361955234839	5.44617219518907	4.67084669873333	5.4103652050676	4.79622201150255	5.49581986838684	4.79145142344223	4.83853575600542	5.57451832201698	4.84573656637628	5.24759888083541	4.8092695265916	5.06614847247639	4.04035631581933	5.12533989758547	6.01731621926631	5.83972483777164	5.5884990334475	6.27427493297111	6.88405166652015
742132	ISG15 ubiquitin-like modifier	ISG15	G1P2	9636	10.1500010174129	10.2011071692698	9.7720384253677	8.53822120022321	9.5560351237026	8.85511404096009	8.32771935479744	8.90619938240738	8.579018195093	9.59299405515784	9.83980279092055	11.256528573378	11.4886447512907	10.7602011513067	10.8690040216145	8.7920180204515	9.0128613238743	8.3273907732577	8.99206881641833	8.6286879839453	10.4962236850421	9.63769711926618	9.97692590168022	9.54636918026008	11.0969059074638	6.82407617824079	5.62390463553444	5.92749969343645	7.03580432580407	6.11020543031123
738325	Fumarate hydratase	FH		2271	7.28822376994967	3.41079427603680	3.95726076860129	7.0003816628715	7.02362347873656	6.05640654987583	5.33414596933882	4.65897430561909	6.0510268261563	5.98194619947161	6.00380359947396	4.34699334553882	5.9846913709063	6.04589769932053	5.91614912401571	6.93954648374578	6.33108162336998	6.18720327595266	7.47734510402273	5.99803795762582	5.99275803506341	6.36802496710257	3.33330596824764	5.18876879384105	7.49936226760482	7.25908040775578	6.74884015462875	7.43415642711717	7.61851543282683	6.2529213765978
759954	Josephin domain containing 2	JOSD2	SBBI54	126119	5.77381734877949	7.17355917975798	3.19006719742922	7.25408198482477	7.68495887839534	4.27812594113166	5.82651268696421	4.04117115937543	6.25869602339147	6.69106687294477	6.84422406073804	5.45901002736841	7.23539427255607	7.3376064483943	6.23976777100949	7.00624910456329	7.39913099646244	6.99515083452174	8.20709075728938	6.78567718143688	6.91617492390771	0.9193581873805	5.68648335108465	6.16735938875576	2.18459667986799	7.24297794034128	7.64904670692504	7.11732105658515	7.8885796187918	7.97300238620361
1143086	ATP-binding cassette, sub-family D (ALD), member 1	ABCD1		215	8.16042363945037	8.03356607988123	8.88442208228025	8.14395667256153	8.526926118993	6.68207786188819	5.94569051847266	5.65315709402482	6.63066180594778	6.22109745239458	3.49283991928337	8.74774756591113	7.074158742057	6.33896904518825	7.36383118077057	7.96384717107362	7.53292372543211	7.97055556459545	8.52610957218947	6.55821482764797	7.06745988983523	6.60850995214219	8.11698857964658	6.21213556434809	7.7361416802321	7.66489335656221	8.2905019349794	9.12010448542363	8.79954174392818	8.7025850552014
159616	Mannose receptor, C type 2	MRC2		9902	7.8805370345675	7.36506297291439	7.46401847391179	7.24737237665076	6.89134631097623	4.89186059364315	4.646116162794	5.76362209949991	6.36559957898865	3.82292372466609	5.43892131197956	5.94319638393115	6.34136511900304	6.84780180979061	5.63252937290258	6.91695730145295	6.56218106658715	6.80507955511364	7.4118993041362	5.87571047497812	7.0552726522738	5.57998992106721	5.88110117918128	6.57452263325593	7.31282007074095	7.78929647790155	8.27920965837632	8.12451149396433	8.67755375679219	7.77733195096507
131839	Folate receptor 1 (adult)	FOLR1		2348	7.0148895061973	6.90960906521245	7.29837308919791	7.09244053205055	5.81245151359665	5.68061145205356	5.06502749367714	5.45667932447184	5.20337898137922	3.65055008143343	7.28891672796084	6.77141048539528	7.38620535174331	7.36649998073171	6.8298110319831	8.99057430779227	6.61431543430713	5.86835762991375	6.7651339513982	5.166585795476	6.42777827005767	7.07893538572726	6.18584522280739	7.74602455060984	7.51806795708488	7.8953545881377	8.43026479191647	8.26017111258268	8.31899528361483	7.20504757898424
486257	ATP synthase, H+ transporting, mitochondrial F1 complex, gamma polypeptide 1	ATP5C1		509	9.54875387403436	8.73208016605772	8.8135994225118	8.67905979044045	8.74006826040246	7.5172842908601	6.18508712847458	4.02570028132398	6.83835373842334	8.47749740799374	7.39404176688189	6.94722577716313	8.2841156073403	6.72096113551327	7.43121660582328	8.488766568988	8.35692091023131	6.92104057757495	5.86608515728730	8.97764811639566	8.0344503502564	8.026625297953	7.49376480145764	8.28041956261729	7.6878304165838	9.09520271553057	8.61884999228748	9.28377817807898	8.7927296793196	8.8770820824583
725418	Solute carrier family 3 (activators of dibasic and neutral amino acid transport), member 2	SLC3A2		6520	11.1625217192129	11.1759842109528	11.0220801831411	11.5525980525361	10.5294933398598	9.76496731855195	9.59299405515784	7.7542693904528	9.6795017784635	9.79462563616487	9.80733157850494	10.0966498602408	3.98697035142005	9.814764294568	9.8044531804135	11.1441394375298	10.0036003965803	9.61308726566167	10.9537092866292	8.8564872377671	10.1179347434768	10.3871035188629	9.9084918965885	8.61884999228748	10.4137923350571	11.7421266499649	11.3965086524715	11.3077244010262	11.3270482957174	11.2393694175509
190133	Microtubule associated tumor suppressor 1	MTUS1		57509	9.44863619398332	8.8373627423593	9.11128559918317	8.82321622072877	8.62975486381506	3.52986640307863	7.20704753740889	6.72560155159136	5.82178730002543	7.01926857899548	8.14560430392812	8.15735848896626	8.4613210387303	8.40223918993364	8.35735225057454	8.62005953133443	6.45398686699128	7.55348846459069	8.08865935951505	7.20761134117493	7.18320090746482	7.16652962630138	7.1883442367331	7.47154435249321	8.08337473803872	8.9425095408236	9.9084918965885	9.6265253435697	9.02594353493805	8.92724908384058
246764	Paired immunoglobin-like type 2 receptor beta	PILRB		29990	9.1644807579061	8.62005953133443	8.80372461485265	9.05886686654674	8.84070690656139	7.86439730763476	6.48881943778957	7.54625866068843	7.69449184247169	7.18179517533315	7.0270850461266	5.88803301509638	4.73172718185942	7.52664764863915	7.5421703622498	8.54264830019946	7.7534491842877	8.0439810043686	8.00538630684106	8.25033500134118	7.65424196041007	-0.987680271875256	7.25219552203675	6.91771914721115	8.25643132767533	8.8032409100554	8.8564872377671	9.5090076146604	9.68372697293407	7.42901072438132
745003	Zinc finger protein 76 (expressed in testis)	ZNF76		7629	8.73807385587136	7.82466912747429	8.20005194688386	7.1300814307306	8.39659563662416	5.48360916764294	3.2947952156911	6.63066180594778	7.10936948668304	7.26987098766786	6.84852806225474	7.898184908631	6.35589244112605	8.04718305083495	7.57611678844731	6.65191478767416	6.74958380408941	7.25170531218783	7.38824622312768	7.1505549369148	7.19896125750861	5.61066278204513	7.56454796549397	6.6928509569696	7.60229422653547	7.99023166400197	8.49588515754605	7.62996741336364	9.03693407718351	8.34982921109693
289580	Prenylcysteine oxidase 1	PCYOX1		51449	7.9026118613088	7.43580692250819	5.8341746877009	5.85445180838387	7.07806439447292	6.11039806828698	9.54450916412772	6.89895376484841	6.52640464526002	3.02456880687821	5.15129758833518	7.82374966257854	6.66852183062303	6.87033564843133	7.82342035195081	7.61542907897823	6.36862774236374	7.1653441612409	5.77208359224655	5.83902115691234	6.94751131792031	6.27843063739558	6.15013127689682	6.29815481741598	5.09638156409665	7.37631582877623	7.52364160182014	8.87573593916595	8.3438150465042	8.16697065835697
530545	Vaccinia related kinase 1	VRK1		7443	10.3289254927812	9.7359556632018	10.219287229825	9.87460432938266	10.2833369282526	6.92893209133813	3.31108837705509	8.63053955971815	8.44117663213556	9.2943235888167	6.04361448956328	9.61770929106673	10.4137923350571	10.0254420162343	8.85258692875084	8.90543094541109	9.27211807878893	9.87717874232482	7.96219701403912	9.54636918026008	10.4360374889624	9.2943235888167	8.87431144098874	9.3618062820821	9.70533926402187	9.14355541878202	10.5971861112639	10.8344627646950	10.8390261853116	10.3749468594446
703411	Dyskeratosis congenita 1, dyskerin	DKC1		1736	5.33660542242268	6.78814857910807	7.41315463360683	8.10929137112038	7.24297794034128	6.57122148498653	5.61913901799547	4.05026196860734	6.27568899795439	4.8407484492432	7.51782241426736	7.14239000916772	6.92893209133813	6.77016957493311	6.53584748773596	7.9081045052716	7.0054985930007	6.47303753069311	6.35562973869873	6.24151212228085	6.45528923908479	5.12706117405779	6.1621602470254	5.80050328238669	7.34148926600887	7.86043869390768	7.70600993410364	8.12451149396433	8.55294417097605	8.62975486381506
74664	Fused in sarcoma	FUS		2521	8.13413310794098	5.16031823866431	8.56018295134697	8.9586782265505	8.35411000393262	7.54875156527267	5.53683738061989	6.9842619707143	4.72905793303419	6.6042365128857	7.85805252593382	7.92907004058551	7.53625250365412	7.57647190899534	8.5840255278623	8.4260995780056	7.84715777347561	8.11002259869952	2.39366578626318	7.84357276018264	7.43295782203543	6.16270203549708	8.02376799269304	7.94990435432444	8.14895553727396	9.12283160829685	8.27551980212076	8.33348211749196	8.58452913015272	8.44363427088222
740032	Nuclear receptor subfamily 2, group F, member 6	NR2F6		2063	6.5217922396959	6.94921594134893	7.71352355472245	6.63813514455001	7.7157265578459	7.32876623425123	4.47174003004253	5.76362209949991	5.93784309771723	6.29700330423048	7.99061256502431	4.40335618140238	5.6682791162929	7.28125997271936	6.29645159884729	6.78140267000157	7.19766275113552	6.69318818467725	7.26084481693438	6.16091782733456	2.63971208283338	5.82902520033416	6.33229862409624	4.99556824096298	6.00470049646692	7.76749252899368	8.00141282668807	7.6383682320116	9.12137323471585	7.24516635535358
39593	Somatostatin	SST		6750	5.52976659442588	5.78446919466422	6.68993473854114	7.55279839662788	3.54571818354308	5.71851791960694	1.09172125563471	6.2537194511332	5.56469218071249	2.77746632688238	3.26992797027286	6.86277936626092	6.71768135725805	6.11520271313137	6.97286812029233	4.4616239815367	6.00285350582849	5.7292038201424	6.60394577660011	6.60278083600017	6.07521374271083	5.1808244166048	6.18584522280739	5.66962514420085	6.16634712097349	5.54234573195469	7.11659697417071	8.07165922530069	7.36607109040609	7.12194902370319
324066	Tyrosine 3-monooxygenase/tryptophan 5-monooxygenase activation protein, eta polypeptide	YWHAH		7533	8.90091647355118	8.5196238127606	9.09341969564517	9.0404653603237	8.99655857798588	7.08928821793207	6.24421809338386	7.51972494752338	3.11850219334984	7.43682663007393	8.0257896038938	8.66077006863608	8.59399095378295	8.35648944088636	6.57416511593168	8.37563369937545	8.0840004039618	7.74894383656535	8.19664488238052	8.84825257812533	7.32916817159981	6.75797920921273	7.74644115982057	7.72254184377802	7.27882758714612	9.11433325126062	8.88058188366125	8.89413618367214	9.2292382266131	9.88460171839643
50794	Zinc finger protein 133	ZNF133		7692	7.74894383656535	5.12564233995204	7.21775911793858	8.20485618841873	7.44879851662903	4.89186059364315	4.59850014333656	5.76362209949991	5.80453460721062	6.00254488770584	6.05301576052293	6.4545348706233	5.30073599610069	7.28976318233069	6.02587984057045	6.86521604947682	6.34338744049922	6.31712176698961	5.18556392439436	5.67672146634499	6.23391875364908	5.1808244166048	3.16118610962688	5.79269887864987	5.87859769762663	6.88475478358575	7.47953342507267	7.01899194425784	7.4534359200518	7.39535611440643
768241	DNA (cytosine-5-)-methyltransferase 1	DNMT1		1786	8.34338153675205	8.01542413922832	8.73557607979844	8.55460214739362	8.49813805156045	6.8511795273534	5.03315288043109	6.1782923156003	5.93784309771723	5.68371244231743	6.31186095717418	5.53018406485527	6.76544410509861	6.48673180914905	2.21269738360695	8.62557389471984	7.42448377810611	7.04339870659988	8.13264823770011	7.11101178573505	6.62801794150608	6.52527696527136	6.61071603902114	7.20504757898424	7.20599580224709	9.1644807579061	8.69618771673938	8.90814452607438	9.05609824334067	8.23906869911203
366254	Golgi glycoprotein 1	GLG1		2734	10.3104812167342	9.3385179187649	9.6540795445284	10.6249594854232	10.1729688963961	7.61769830778996	5.29347164883813	7.58793864927318	3.82385897950633	5.61098089319995	7.95914642822178	8.0480659597201	8.5351046067045	8.86183052110883	7.95914642822178	8.5898071232106	7.3800927648538	6.50402959853174	9.15741337731304	7.62962683492537	8.41651542150455	6.73609778299079	1.67050476770984	7.328364184891	9.2292382266131	9.22078210471439	9.72529343877447	9.93129943594242	9.94528841148154	10.4730520693860
470035	Prokineticin 1	PROK1		84432	6.77016957493311	5.41149757975406	6.69695762513628	7.05969083172704	6.96228397169918	5.6155171975591	2.68317941311693	5.86229404674146	2.05147398181095	6.2583549250657	5.33751972170576	6.09214041703298	2.50759394533284	5.94922702504474	1.9540387187161	5.53125855720914	6.56218106658715	5.80921517872182	6.16535163554342	2.23236688411345	6.45528923908479	5.9948081238757	5.91874852947874	6.29815481741598	6.28822099511246	6.45273231369535	6.57303473055147	6.58324978217326	7.77369634986919	6.74716004206172
60297	Cell division cycle 73, Paf1/RNA polymerase II complex component, homolog (S. cerevisiae)	CDC73	HRPT2	79577	10.8568412140326	11.4421186408925	11.1866862501962	11.5763735240006	11.7342663207514	9.27623574924406	7.94156327992191	9.3574027267523	8.87276327763574	9.72327304830377	9.93761075924379	9.99338443301037	10.3935404701393	8.36223189819343	9.76781480387148	9.85572062346814	10.2677394944104	9.89728662553203	10.2788577513213	9.5947282803366	10.0145892342148	6.7199926066317	9.98777522832616	9.87717874232482	10.0966498602408	11.2665669556621	11.5023019812666	11.2941682931699	11.7052342599228	11.4886447512907
684879	galactosidase, alpha	GLA		2717	6.4151435182029	6.73859234542431	6.87898524997758	7.9298048528976	7.50813864151304	6.5855804929714	6.26149868030596	6.72560155159136	6.64113853442871	7.48138279443539	7.49263054205367	7.27882758714612	6.89158732569848	7.38402958118002	6.85221282861479	7.8711066161277	6.93454430781356	7.23991222629317	5.38715080852491	5.74071583167931	6.78030283045828	6.54415549691066	6.90994993772027	6.25002791159197	7.76129616307625	7.83730187539081	7.94578227270845	8.33460736556614	8.69669912742829	7.7534491842877
166268	SR-related CTD-associated factor 1	SCAF1	SR-A1	58506	7.63358996830457	7.62730426415563	7.89343325677422	7.52554955219619	8.09275601208931	6.54060174160559	5.59311923624277	6.39879387764385	6.65770037369515	6.76907139071463	4.6872503138812	7.4046538563754	6.74394494257842	7.7414305313512	5.33414596933882	5.93252612501345	7.17967009039929	7.29677364620144	4.4285721973272	6.80568510620379	6.93298694031134	6.66876969260804	6.47452127144163	6.76139795425953	7.87891630120433	7.38439906390783	7.70600993410364	7.70600993410364	8.13098496104905	8.6539167136559
232956	Cytokine induced apoptosis inhibitor 1	CIAPIN1		57019	7.83585203729424	3.46267258673028	7.37881307121597	8.55835235039	7.1673530364961	5.9001797195254	8.330666516504	5.81343528847377	5.89162606503492	6.2583549250657	4.47107733276226	5.674686619928	6.40172177998778	7.60272311623063	7.29315322984447	7.52203207800264	7.12081179260642	2.53042362350501	6.70936987735795	6.16270203549708	6.12730055865619	6.01909802867576	5.73587586734678	6.4976376281829	4.25008849501896	7.37714517030525	8.12327661246133	7.79127794875887	6.66147121907391	8.05955303775045
132576	Granulin	GRN		2896	10.785414081313	9.83066333023878	10.1148942811066	10.6121884222069	10.3574813674063	7.43712283882142	6.92649755673067	5.68037977734584	7.66066650813368	7.90015224638042	8.89255117428211	9.10316813571345	9.28822430392266	9.75450114070333	9.11128559918317	10.1376515075279	8.22760452012304	9.2573258398341	9.7608979774584	8.637876489977	8.62350387625945	6.0639837814485	7.41150428389864	8.01897632353744	10.0714475861602	9.69878218463102	10.9687235246798	10.2425295737906	9.74825085935216	11.0169209139663
251814	Transmembrane protein 9	TMEM9		252839	7.45643324484273	7.34804849230209	5.57651783265258	6.61367781394868	9.33545999264688	6.1621602470254	5.77759574876301	6.14147243575175	5.09001189159748	6.35692696771057	4.51674727548052	6.12989303317271	5.81069364714865	5.87713888487220	5.99856079614888	7.05651870736914	6.56218106658715	7.18902647177877	7.10807428872509	7.09300763583755	6.31311092466597	6.25129783164456	6.7417061214877	6.8090631159389	6.76327835214356	7.57826543268206	8.32500507289544	7.70855582086389	7.62168560672668	8.08672630005468
366233	Diacylglycerol kinase, theta 110kDa	DGKQ		1609	5.04927163175036	4.54780519526963	5.16779921471843	5.31517823067247	4.06560939345858	3.08585596824463	2.98037822909277	3.70071274376401	3.94314537015696	4.80274129897164	4.83289001416474	4.65276239480806	4.67084669873333	5.29959936554072	4.25808294274203	5.56261679418779	4.44867516745788	4.39640209709362	3.89535477989367	5.53683738061989	3.73513909822939	4.31256706915095	4.59270681658262	4.47684718585426	4.60139468868005	4.54357027629507	5.77238766168595	5.6762583908223	6.80538236243016	6.018042028946
243852	3'-phosphoadenosine 5'-phosphosulfate synthase 1	PAPSS1		9061	6.36362730446693	4.36623698923673	6.83789894318116	2.41782634984849	7.58760635219044	5.27809946834073	5.16318787856285	5.45667932447184	5.27716142976437	3.19884472878562	5.90193614997022	6.40771012540854	5.10586707884167	6.26422492496779	6.46598763412849	5.3690312938517	6.26726376305086	6.28020988380856	5.96525454484838	6.3788989794673	2.45376135706848	4.39930199412923	5.96301329433685	6.04016987733862	6.24000494793852	7.10134217910811	7.01839511253353	6.66353986465726	6.69106687294477	7.08436732594496
505242	NOP16 nucleolar protein homolog (yeast)	NOP16	HSPC111	51491	8.77951773750758	7.61478857338715	7.65231607314967	6.66213562720248	8.59502994152795	6.79143491152907	5.79634231685989	3.6691559717228	6.36770033399074	6.22109745239458	5.01802406427885	6.79623022729639	7.29315322984447	7.39404176688189	6.40937415114802	8.18761818621903	9.31031326157382	7.36160562414173	7.34495220592965	6.21797778434975	6.44022814858067	2.23236688411345	3.41906413038361	7.8128366625393	7.64373451431843	8.32119243534826	8.40068572761047	9.00292874790825	9.87217787449622	8.87946294004095
565809	Transmembrane protein 97	TMEM97	MAC30	27346	7.38402958118002	7.06939826930391	7.1556154878792	9.65751428594296	9.81234141134942	6.08743766369258	6.81065074062834	6.84966737629708	8.28496279663972	7.79515474161382	7.88291289104996	8.23343522521436	8.01587686496182	8.34424842603185	5.48766198141865	7.82018977006271	7.99136379430453	7.67522045027567	1.47446890290961	7.38689019113074	8.4565196406636	7.1248713954625	8.4181793626498	7.8876684172207	7.82143796308957	10.1984229083668	10.2232762478173	9.25259556378288	9.47250431998606	7.90606238717939
625952	serpin peptidase inhibitor, clade E (nexin, plasminogen activator inhibitor type 1), member 2	SERPINE2		5270	11.8363722168367	10.9881686864810	10.3104812167342	11.7492652018978	11.7158635570770	9.93129943594242	8.78590418700477	8.16697065835697	8.76610311770145	8.00293644542785	9.41634148258421	10.5369457741281	10.1613000885811	11.0560262116816	9.47082209961686	10.9797335506404	9.7997987333372	9.97692590168022	10.5652689878641	8.91224880585365	10.0219599615899	9.82187727565128	8.8872891926181	9.8949248829099	10.4283421160427	10.5780417075792	11.4967709662528	11.3008470470116	11.3424618473792	11.4168252621941
647257	Synaptotagmin binding, cytoplasmic RNA interacting protein	SYNCRIP		10492	11.3270482957174	10.9329498971830	11.2209483130282	10.4962236850421	8.95034202521687	2.17524159881808	8.15120942500366	9.42592533889976	9.66595060936893	10.2833369282526	7.9874621812374	2.85909045493701	9.6774840592567	9.7359556632018	2.70865872839022	10.6609573407043	10.219287229825	9.88705132803928	10.7130427365867	10.1861347204224	9.87460432938266	8.99482476914572	9.26894052350316	2.85909045493701	10.2968234741752	11.0709568692103	11.3691805966426	10.7307034816599	11.2456781389742	10.4962236850421
324031	Tubulin, beta 3	TUBB3		10381	11.1812153234539	9.98777522832616	9.0144396486154	10.8690040216145	11.0818728032524	8.70515651368272	3.36577757293373	3.05973805768042	8.579018195093	9.15027683617962	9.55065194941662	9.33147893895597	8.95164110202649	9.4571402859059	8.81470140204779	10.1089277216032	10.0938467245778	9.42411742660798	9.95672662579774	9.7242835972155	9.56514340826604	9.13125067483095	7.84047458779372	9.1769887681366	10.0912709764000	11.2281737778245	11.1260642560686	11.4967709662528	11.4967709662528	11.0220801831411
564547	glutathione S-transferase theta 2	GSTT2		2953	10.3749468594446	10.3559337453371	9.65751428594296	11.0169209139663	10.1434474513542	9.4350600455548	8.37948278346689	7.62444411028705	9.25259556378288	9.4799684503588	9.3120887469288	9.12137323471585	9.40653286257493	10.1148942811066	9.36810130366486	10.6011967047735	9.8023847178193	9.56682540285082	10.3328707090157	9.4496857579763	9.75068836510336	9.74003903744897	10.4428998778628	10.4801557251742	9.4275278405092	10.7182474098316	11.4701720576268	10.8568412140326	11.4096899384934	10.7288579026440
1712992	Zinc finger protein 217	ZNF217		7764	5.09154719675685	6.41858881269068	5.90578875033757	3.55255820836703	5.66926946624517	5.58189560877353	5.97435395736355	3.73441122491069	3.62019662079413	5.14868026510846	6.87083397179567	7.24160443948108	6.89158732569848	7.67867400957654	6.68834637492554	6.32906084782311	2.21269738360695	6.06024264576871	6.5155813302446	2.92656473778975	6.23391875364908	4.52990098862459	6.31897948623727	5.9598488241576	2.25117496566392	7.09300763583755	7.23062716483063	9.03101827838309	7.91920287356965	6.57416511593168
153128	Plakophilin 3	PKP3		11187	9.50300252003191	9.92879825672233	8.99338355960928	9.57985841280803	9.92576118075577	7.52428344570127	3.36577757293373	7.98138889611721	8.08727514247608	8.40068572761047	8.24111301246098	9.93129943594242	9.18298743094684	10.0626161028574	9.10316813571345	8.83556090539252	9.22426389409545	9.93129943594242	9.94252798948066	8.7829306577698	9.06615989633545	8.31044055891663	6.59675991689408	8.09512148122371	10.3248718506961	10.4906720572184	10.3104812167342	10.3871035188629	10.2071425306070	10.3712896568857
248955	Cytochrome P450, family 24, subfamily A, polypeptide 1	CYP24A1		1591	11.041645052259	10.3590273310740	9.39377581230364	10.8776491384916	10.3397996530285	7.35969118757167	6.76715777137801	7.45550215513711	7.38069147895376	7.22263351616434	5.51695916432348	8.64669539782951	8.90307906349965	7.86941687387254	8.73495790099955	11.0613672376406	9.4651502846035	8.92652148330453	9.63529919511764	9.01574572583718	8.60883035820755	8.01340377652365	4.00490614939877	8.76501142178897	9.43262093538937	10.7270099596321	9.77667119786733	10.3749468594446	11.2665669556621	10.5694094541220
432360	Polymerase (DNA directed), mu	POLM		27434	7.10399736016775	6.54507431819151	5.39966326062799	6.05301576052293	3.16955971595083	5.9001797195254	4.88094120727214	5.52442045943548	3.82025976529633	5.53508216097954	4.90669883225777	5.87934787985641	4.50978803063373	5.63737578082936	5.15544368590825	5.31517823067247	3.47581037538588	5.19929634166475	6.11596419405479	5.38550284904482	5.5694230233177	5.2682976971827	5.25865965136243	3.94866294156079	6.18284690248851	6.31364424377028	6.70084835947188	7.28188338118861	6.54029188409288	6.4654759962215
447261	Kinase D-interacting substrate, 220kDa	KIDINS220		57498	7.6561632573136	7.19865216386527	6.02675104250727	7.20678363244498	9.35828998468485	6.61113163283827	6.64655643167957	6.14147243575175	6.75542638304191	6.06945826529133	6.55375565192923	7.22699385164507	4.9680196424115	8.7519533062777	6.58620718931927	5.24038377626314	7.37348643209821	7.06572203059514	7.99061256502431	4.66207116123008	7.21163728621096	6.90877766685836	3.71650475266754	6.17109558269202	8.82438863369226	7.74501910577089	8.85511404096009	8.92924698315876	7.63669562479391	7.46429141102426
469386	Solute carrier family 35, member C1	SLC35C1		55343	4.56421993071072	5.5694230233177	5.66365335150656	7.11258566106568	5.16494287747805	3.96707665258488	5.48642772867458	3.83704742527987	4.97299450458789	2.65784981440172	6.21470306282542	5.95410168380838	6.5507105044948	6.82488726139615	2.94169174010276	6.74025213988051	6.58095524044549	5.90071665474292	6.58266270502621	5.22420046547844	5.497245503329	4.59270681658262	5.49273510772519	5.4531299501219	6.6713645945276	7.10914107976047	6.85249178003204	7.85805252593382	7.4534359200518	7.0877402688397
503132	Nuclear transport factor 2-like export factor 2	NXT2		55916	7.05392880206778	6.96025457043212	3.96143870420837	2.84760609201374	3.16955971595083	5.31789627432373	6.80398781904574	6.72560155159136	6.83835373842334	6.9574435402596	6.36362730446693	3.15539468737493	6.89158732569848	7.3376064483943	3.11211547315512	6.80428094941616	7.19113497859725	6.7382812820718	2.28426156603772	6.60278083600017	6.68324738529501	6.56620858199055	7.16941704082628	5.00046360814478	6.76327835214356	7.04246131140297	6.77795523930608	6.68942413100531	7.4738280848127	7.34520331227
124644	ATP synthase, H+ transporting, mitochondrial F1 complex, beta polypeptide	ATP5B		506	11.3965086524715	10.5252216284833	10.8010639341241	11.7342663207514	11.9674636257221	9.8783878057503	6.6984259856021	8.47465738222726	9.32003405054097	9.92879825672233	9.01996239630508	10.7348831634042	10.8390261853116	11.1313889931381	10.4928510637767	11.4886447512907	10.785414081313	10.6160926587928	11.3553841849615	10.8515354104187	10.0995604209136	9.73485687590637	10.2628260331520	10.535027037474	10.1671355688768	11.9754615653042	11.615206845217	11.5832435700618	11.5388504445384	11.4824793060633
531576	Sorting and assembly machinery component 50 homolog (S. cerevisiae)	SAMM50	CGI-51	25813	8.97764811639566	8.40525916449467	7.00938307005231	8.49441762799	8.74985928624524	8.13264823770011	7.21530075155431	7.35776870995516	6.63921521660545	8.14032254416778	7.74894383656535	8.32820671993874	8.43528407093233	8.57078111481261	6.5643841986278	7.33937477541203	8.0891863331404	4.27609023732681	8.46564926899055	8.1563204942757	8.6390752846817	8.22760452012304	6.271127595264	8.67266137419417	7.9410523668901	9.13830718532896	8.91107965883338	8.7847743399162	9.36322521920623	8.51678778604777
593882	thioredoxin reductase 1	TXNRD1		7296	9.71176718219514	8.49144257178456	5.7177566693636	11.1385134430610	10.4211634907906	10.0197777562048	8.5196238127606	3.32297093250445	8.6508387328019	9.39470335492422	10.2474979517184	10.9537092866292	10.7424208405482	11.4352483981986	8.94088274230239	10.8010639341241	10.5000014458980	10.8690040216145	10.5252216284833	10.0369797236055	9.77942215861847	9.10378396079095	10.4283421160427	10.1825731311837	8.9381028107235	10.7704971461794	11.5160799436545	10.8426955145067	11.2734599154709	10.1955405561313

## Sheet: Legend
Table S2: Gene expression data for 300 influenza virus regulated genes identified in our experiments. Values are log2 normalized gene expression intensities (see Material and Methods).
