# Supplementary material for: Gene Expression Signature-Based Screening Identifies New Broadly Effective Influenza A Antivirals
Source: PLoS One. 2010 Oct 4;5(10):e13169. doi: 10.1371/journal.pone.0013169 (PMC2949399; doi:10.1371/journal.pone.0013169)
Supplement: Table S5 — Comparison between the 300 regulated genes in our experiment and identified factors required for influenza replication in published human RNAi screens. Genes belonging to the concise signature used to query connectivity map in our study are highlighted in grey. Negative regulators of influenza replication (antiviral) are genes whose depletion enhance viral infection. Positive regulators (proviral) knock-out decrease viral infection. Antiviral factors were identified in Shapira et al and Brass et al studies. (0.03 MB XLS) [file pone.0013169.s014.xls]

## Sheet: Overlap with published screens
				Karlas et al. 2010		Konig et al 2010		Shapira et al 2009				Brass et al 2009
Symbol	GeneID	Expression after infection	Signature_Connectivity	Primary hit (A549/WSN)	Confirmed hit (A549/WSN or A/Hamboug/04/2009)	A549/WSN-Ren	Confirmation (A549/WSN)	Y2H (H1)	H2	Expression Cluster (HBEC/PR8)	siRNA (HBEC/PR8)	U20S/PR8
ETV3	2117	up	Y
ABTB2	25841	up	Y
SLC2A2	6514	up	Y									proviral
PPFIBP1	8496	up	Y
ICAM1	3383	up	Y							6	proviral
MEF2D	4209	up	Y
HYAL4	23553	up	Y
LPAR1	1902	up	Y
OAS1	4938	up	Y							2	proviral
CFD	1675	up	Y
ALG2	85365	up	Y
ISG15	9636	up	Y	proviral	proviral					2	IFN pos reg
OASL	8638	up								2	proviral
IRF7	3665	up								2
IFITM1	8519	up								2		antiviral (not found in the primary screen)
IFIT3	3437	up								2
FOSB	2354	down	Y
KPNA6	23633	down	Y
HSPG2	3339	down	Y							11
CAPN1	823	down	Y
PPP1R14D	54866	down	Y	proviral	proviral	proviral	proviral
PNPLA6	10908	down	Y
DNMT1	1786	down	Y
NOP16	51491	down	Y
CLASP2	23122	down
MAN2C1	4123	down
BTBD11	121551	down
ACTB	60	down
DECR2	26063	down
GEMIN4	50628	down								10
VPREB3	29802	down
HELB	92797	down
SUSD1	64420	down
RRP7A	27341	down
TGIF1	7050	down
MRPL48	51642	down
NCK1	4690	down
AURKB	9212	down
RPN2	6185	down
IFNG	3458	down
SCUBE2	57758	down
MAP4	4134	down
PLCE1	51196	down
MGAT1	4245	down
NUCB1	4924	down								10
CDC20	991	down
CPSF1	29894	down
BID	637	down									antiviral
MLPH	79083	down
CTSD	1509	down
TUBA1A	7846	down								10
PSMC4	5704	down
PGD	5226	down								10	proviral	proviral
PREX2	80243	down
TUBA3D	113457	down
PCNA	5111	down
SNX17	9784	down
TPD52L1	7164	down
CLK2	1196	down								11
GBA	2629	down
BLOC1S1	2647	down
FZR1	51343	down
NISCH	11188	down								10
AIFM1	9131	down
SCRN1	9805	down								10
SLC22A3	6581	down
SLC7A7	9056	down
AGGF1	55109	down
FSTL3	10272	down
XAB2	56949	down		proviral	proviral
SMARCA1	6594	down
STRA13	201254	down
CXXC1	30827	down
FPGS	2356	down
HSP90AB3P	3327	down
EBP	10682	down
PMEPA1	56937	down								10
PPP2R5A	5525	down
ILK	3611	down
LAMB2	3913	down
E2F2	1870	down
ACTB	60	down
GTF3C1	2975	down
TLN1	7094	down
TRIM28	10155	down				proviral	proviral					proviral
NRD1	4898	down
SLC24A6	80024	down
DHX9	1660	down
SEPHS1	22929	down
TWF2	11344	down
TKT	7086	down
GAA	2548	down
DNASE2	1777	down
PTPN3	5774	down
TRAF6	7189	down							1	6	IFN pos reg
GATA1	2623	down
FADS1	3992	down
C1QTNF2	114898	down
DDB2	1643	down
MTOR	2475	down
LHB	3972	down
FLNB	2317	down
PDIA4	9601	down
CLU	1191	down								7	proviral
CBY1	25776	down
CDCA8	55143	down
ZCCHC9	84240	down
CANT1	124583	down				proviral	proviral
CD36	948	down
SOX2	6657	down
ALDH3A1	218	down
CARS	833	down
SFPQ	6421	down
MCM7	4176	down
PMS2L3	5387	down
LMNA	4000	down									proviral
SCAMP4	113178	down
TCF4	6925	down								4
PCNX	22990	down
KLF6	1316	down								5	proviral
SARS2	54938	down
ALDOA	226	down
SLC37A2	219855	down
JAG2	3714	down								10	antiviral
CD63	967	down
PTPRF	5792	down
POLR1B	84172	down
CDH19	28513	down
RHBDF2	79651	down
INSIG1	3638	down								3
C1QTNF6	114904	down
FDPS	2224	down
CYFIP1	23191	down
PTRF	284119	down
CASP3	836	down							1		antiviral
GPM6B	2824	down
EXOC3	11336	down
L3MBTL2	83746	down
IL13RA1	3597	down
NDUFS4	4724	down
PKN2	5586	down
NTF4	4909	down
NT5C	30833	down
ELOVL1	64834	down
UBA1	7317	down
SACS	26278	down								10
RUSC1	23623	down
G6PD	2539	down				proviral	proviral
POMT1	10585	down
TACC3	10460	down
TUBGCP6	85378	down
ABCC2	1244	down
PFKL	5211	down
PLXNB2	23654	down								11	antiviral
CENPF	1063	down								10
VAMP5	10791	down
KRT8	3856	down
ASPH	444	down
NPIPL3	23117	down
CBX1	10951	down
IGFBP4	3487	down
CSTF3	1479	down
STON1	11037	down
THAP11	57215	down
MEN1	4221	down								10
XRN2	22803	down
SIDT1	54847	down
MMP14	4323	down
TUBA1C	84790	down
VPS29	51699	down
CDK4	1019	down				proviral				10	antiviral
SPR	6697	down
APOBEC3C	27350	down
ZNF135	7694	down
TNFRSF10A	8797	down
MAPK8	5599	down									IFN pos reg
AFG3L1	172	down
MRPL27	51264	down
TUBB2A	7280	down
ACSS2	55902	down
FAM19A2	338811	down
AKAP1	8165	down
COL7A1	1294	down
YEATS4	8089	down
STIM1	6786	down
USP11	8237	down
CCDC80	151887	down
AP2B1	163	down								11	IFN neg reg
XPO6	23214	down
KRT7	3855	down
MAP1S	55201	down
SBSN	374897	down
G6PD	2539	down				proviral	proviral
LOXL1	4016	down
GCN1L1	10985	down
ACTN1	87	down
IGFBP6	3489	down								1	proviral
CYP2S1	29785	down
SNRPB2	6629	down
EIF4G3	8672	down
SEMA4B	10509	down
PTP4A1	7803	down								8
TUBA4B	80086	down
CPB2	1361	down
SPG7	6687	down								10
MAP2K5	5607	down				proviral	proviral
DARC	2532	down
PKD1	5310	down				proviral	proviral
PAK4	10298	down
DOK1	1796	down
LTBR	4055	down
HSPBP1	23640	down
MCM5	4174	down
ELOVL5	60481	down
SLC9A10	285335	down
PKM2	5315	down
VCL	7414	down
EIF3CL	728689	down
NPC1	4864	down
THADA	63892	down
VCAN	1462	down								10
FLOT2	2319	down
UCHL3	7347	down
EHD1	10938	down
CDIPT	10423	down
RBM28	55131	down								11
HARS2	23438	down								11
NCLN	56926	down
PPIE	10450	down
PSAP	5660	down		proviral
SLC25A11	8402	down
THRB	7068	down
DNM1L	10059	down
TUBB	203068	down				proviral	proviral
IFI44L	10964	down								2
GGT1	2678	down
SIGIRR	59307	down
TEX264	51368	down
LONP1	9361	down		proviral	proviral
BCAP31	10134	down
RANBP10	57610	down
ALDH1A1	216	down
POMZP3	22932	down
FAM127A	8933	down
CCM2	83605	down
DCTN2	10540	down
LRRC16A	55604	down
IGHMBP2	3508	down
CXXC5	51523	down
LAPTM4B	55353	down
NOP2	4839	down
TRPV6	55503	down
PTCD1	26024	down
NDUFA10	4705	down
BHLHE41	79365	down
ACTN4	81	down
ZNF215	7762	down
FH	2271	down
JOSD2	126119	down
ABCD1	215	down										proviral
MRC2	9902	down
FOLR1	2348	down
ATP5C1	509	down
SLC3A2	6520	down
MTUS1	57509	down
PILRB	29990	down
ZNF76	7629	down
PCYOX1	51449	down									proviral
VRK1	7443	down
DKC1	1736	down
FUS	2521	down										proviral
NR2F6	2063	down
SST	6750	down
YWHAH	7533	down
ZNF133	7692	down
GLG1	2734	down
PROK1	84432	down
CDC73	79577	down
GLA	2717	down
SCAF1	58506	down
CIAPIN1	57019	down
GRN	2896	down
TMEM9	252839	down
DGKQ	1609	down									IFN pos reg
PAPSS1	9061	down
TMEM97	27346	down
SERPINE2	5270	down
SYNCRIP	10492	down
TUBB3	10381	down				proviral	proviral
GSTT2	2953	down
ZNF217	7764	down								7	proviral
PKP3	11187	down
CYP24A1	1591	down
POLM	27434	down
KIDINS220	57498	down
SLC35C1	55343	down
NXT2	55916	down
ATP5B	506	down
SAMM50	25813	down										proviral
TXNRD1	7296	down

## Sheet: Legend
Legend. Comparison between the 300 regulated genes in our experiment and identified factors required for influenza replication in published human RNAi screens. Genes belonging to the concise signature used to query connectivity map in our study are highlighted in grey. Negative regulators of influenza replication (antiviral) are genes whose depletion enhance viral infection. Positive regulators (…
